# Supplementary material for: Polymerase-tagged respiratory syncytial virus reveals a dynamic rearrangement of the ribonucleocapsid complex during infection
Source: PubMed Central journal article supplement (PMC7575074; doi:10.1371/journal.ppat.1008987), 2020-10-08
Supplement: ppat.1008987.s010.pdf [file ppat.1008987.s010.pdf]

**Figure 3B**

| <b>Graph Title</b> | N-L PLA        |
|--------------------|----------------|
| <b>Comparison</b>  | <b>P Value</b> |
| 1 hpi vs. 6 hpi    | <0.0001        |
| 1 hpi vs. 8 hpi    | >0.9999        |
| 1 hpi vs. 12 hpi   | >0.9999        |
| 1 hpi vs. 18 hpi   | >0.9999        |
| 1 hpi vs. 24 hpi   | 0.0063         |
| 6 hpi vs. 8 hpi    | <0.0001        |
| 6 hpi vs. 12 hpi   | <0.0001        |
| 6 hpi vs. 18 hpi   | <0.0001        |
| 6 hpi vs. 24 hpi   | <0.0001        |
| 8 hpi vs. 12 hpi   | >0.9999        |
| 8 hpi vs. 18 hpi   | >0.9999        |
| 8 hpi vs. 24 hpi   | 0.0316         |
| 12 hpi vs. 18 hpi  | >0.9999        |
| 12 hpi vs. 24 hpi  | 0.0154         |
| 18 hpi vs. 24 hpi  | 0.0267         |
|                    |                |
| <b>Graph Title</b> | P-L PLA        |
| <b>Comparison</b>  | <b>P Value</b> |
| 1 hpi vs. 6 hpi    | >0.9999        |
| 1 hpi vs. 8 hpi    | <0.0001        |
| 1 hpi vs. 12 hpi   | 0.9262         |
| 1 hpi vs. 18 hpi   | <0.0001        |
| 1 hpi vs. 24 hpi   | <0.0001        |
| 6 hpi vs. 8 hpi    | <0.0001        |
| 6 hpi vs. 12 hpi   | 0.4174         |
| 6 hpi vs. 18 hpi   | <0.0001        |
| 6 hpi vs. 24 hpi   | <0.0001        |
| 8 hpi vs. 12 hpi   | <0.0001        |
| 8 hpi vs. 18 hpi   | >0.9999        |
| 8 hpi vs. 24 hpi   | >0.9999        |
| 12 hpi vs. 18 hpi  | <0.0001        |
| 12 hpi vs. 24 hpi  | 0.0006         |
| 18 hpi vs. 24 hpi  | >0.9999        |

| <b>Graph Title</b> | M2-1-L PLA     |
|--------------------|----------------|
| <b>Comparison</b>  | <b>P Value</b> |
| 1 hpi vs. 6 hpi    | 0.2487         |
| 1 hpi vs. 8 hpi    | <0.0001        |
| 1 hpi vs. 12 hpi   | 0.0647         |
| 1 hpi vs. 18 hpi   | <0.0001        |
| 1 hpi vs. 24 hpi   | <0.0001        |
| 6 hpi vs. 8 hpi    | <0.0001        |
| 6 hpi vs. 12 hpi   | >0.9999        |
| 6 hpi vs. 18 hpi   | 0.0002         |
| 6 hpi vs. 24 hpi   | <0.0001        |
| 8 hpi vs. 12 hpi   | <0.0001        |
| 8 hpi vs. 18 hpi   | >0.9999        |
| 8 hpi vs. 24 hpi   | >0.9999        |
| 12 hpi vs. 18 hpi  | 0.0013         |
| 12 hpi vs. 24 hpi  | <0.0001        |

| 18 hpi vs. 24 hpi | >0.9999               |
|-------------------|-----------------------|
| <b>Figure 3C</b>  |                       |
| Graph Title       | N-L Centroid Distance |
| Comparison        | P Value               |
| 6 hpi vs 8 hpi    | 0.0026                |

| <b>Figure 4B</b>                                        |                                |
|---------------------------------------------------------|--------------------------------|
| Graph Title                                             | RSV genome-L PLA (# of Puncta) |
| Comparison                                              | P Value                        |
| 6 hpi :RSV genome-L vs. 6 hpi :No Primary Control       | 0.0018                         |
| 6 hpi :RSV genome-L vs. 6 hpi :No V5 Control            | 0.0023                         |
| 6 hpi :RSV genome-L vs. 6 hpi :Scrambled Control        | 0.0059                         |
| 6 hpi :RSV genome-L vs. 6 hpi :Biotin Control           | 0.0143                         |
| 6 hpi :RSV genome-L vs. 6 hpi :No FISH Control          | <0.0001                        |
| 6 hpi :RSV genome-L vs. 6 hpi :Mock Control             | 0.0189                         |
| 6 hpi :RSV genome-L vs. 8 hpi :RSV genome-L             | >0.9999                        |
| 6 hpi :RSV genome-L vs. 8 hpi :No Primary Control       | 0.0017                         |
| 6 hpi :RSV genome-L vs. 8 hpi :No V5 Control            | 0.0059                         |
| 6 hpi :RSV genome-L vs. 8 hpi :Scrambled Control        | 0.0004                         |
| 6 hpi :RSV genome-L vs. 8 hpi :Biotin Control           | 0.0322                         |
| 6 hpi :RSV genome-L vs. 8 hpi :No FISH Control          | 0.0032                         |
| 6 hpi :RSV genome-L vs. 8 hpi :Mock Control             | 0.0004                         |
| 6 hpi :No Primary Control vs. 6 hpi :No V5 Control      | >0.9999                        |
| 6 hpi :No Primary Control vs. 6 hpi :Scrambled Control  | >0.9999                        |
| 6 hpi :No Primary Control vs. 6 hpi :Biotin Control     | >0.9999                        |
| 6 hpi :No Primary Control vs. 6 hpi :No FISH Control    | >0.9999                        |
| 6 hpi :No Primary Control vs. 6 hpi :Mock Control       | >0.9999                        |
| 6 hpi :No Primary Control vs. 8 hpi :RSV genome-L       | 0.0047                         |
| 6 hpi :No Primary Control vs. 8 hpi :No Primary Control | >0.9999                        |
| 6 hpi :No Primary Control vs. 8 hpi :No V5 Control      | >0.9999                        |
| 6 hpi :No Primary Control vs. 8 hpi :Scrambled Control  | >0.9999                        |
| 6 hpi :No Primary Control vs. 8 hpi :Biotin Control     | >0.9999                        |
| 6 hpi :No Primary Control vs. 8 hpi :No FISH Control    | >0.9999                        |
| 6 hpi :No Primary Control vs. 8 hpi :Mock Control       | >0.9999                        |
| 6 hpi :No V5 Control vs. 6 hpi :Scrambled Control       | >0.9999                        |
| 6 hpi :No V5 Control vs. 6 hpi :Biotin Control          | >0.9999                        |
| 6 hpi :No V5 Control vs. 6 hpi :No FISH Control         | >0.9999                        |
| 6 hpi :No V5 Control vs. 6 hpi :Mock Control            | >0.9999                        |
| 6 hpi :No V5 Control vs. 8 hpi :RSV genome-L            | 0.0059                         |
| 6 hpi :No V5 Control vs. 8 hpi :No Primary Control      | >0.9999                        |
| 6 hpi :No V5 Control vs. 8 hpi :No V5 Control           | >0.9999                        |
| 6 hpi :No V5 Control vs. 8 hpi :Scrambled Control       | >0.9999                        |
| 6 hpi :No V5 Control vs. 8 hpi :Biotin Control          | >0.9999                        |
| 6 hpi :No V5 Control vs. 8 hpi :No FISH Control         | >0.9999                        |
| 6 hpi :No V5 Control vs. 8 hpi :Mock Control            | >0.9999                        |
| 6 hpi :Scrambled Control vs. 6 hpi :Biotin Control      | >0.9999                        |
| 6 hpi :Scrambled Control vs. 6 hpi :No FISH Control     | >0.9999                        |
| 6 hpi :Scrambled Control vs. 6 hpi :Mock Control        | >0.9999                        |
| 6 hpi :Scrambled Control vs. 8 hpi :RSV genome-L        | 0.0143                         |
| 6 hpi :Scrambled Control vs. 8 hpi :No Primary Control  | >0.9999                        |
| 6 hpi :Scrambled Control vs. 8 hpi :No V5 Control       | >0.9999                        |

|                                                        |                                   |
|--------------------------------------------------------|-----------------------------------|
| 6 hpi :Scrambled Control vs. 8 hpi :Scrambled Control  | >0.9999                           |
| 6 hpi :Scrambled Control vs. 8 hpi :Biotin Control     | >0.9999                           |
| 6 hpi :Scrambled Control vs. 8 hpi :No FISH Control    | >0.9999                           |
| 6 hpi :Scrambled Control vs. 8 hpi :Mock Control       | >0.9999                           |
| 6 hpi :Biotin Control vs. 6 hpi :Mock Control          | >0.9999                           |
| 6 hpi :Biotin Control vs. 8 hpi :RSV genome-L          | 0.0322                            |
| 6 hpi :Biotin Control vs. 8 hpi :No Primary Control    | >0.9999                           |
| 6 hpi :Biotin Control vs. 8 hpi :No V5 Control         | >0.9999                           |
| 6 hpi :Biotin Control vs. 8 hpi :Scrambled Control     | >0.9999                           |
| 6 hpi :Biotin Control vs. 8 hpi :Biotin Control        | >0.9999                           |
| 6 hpi :Biotin Control vs. 8 hpi :No FISH Control       | >0.9999                           |
| 6 hpi :Biotin Control vs. 8 hpi :Mock Control          | >0.9999                           |
| 6 hpi :No FISH Control vs. 6 hpi :Mock Control         | 0.9992                            |
| 6 hpi :No FISH Control vs. 8 hpi :RSV genome-L         | <0.0001                           |
| 6 hpi :No FISH Control vs. 8 hpi :No Primary Control   | >0.9999                           |
| 6 hpi :No FISH Control vs. 8 hpi :No V5 Control        | >0.9999                           |
| 6 hpi :No FISH Control vs. 8 hpi :Scrambled Control    | >0.9999                           |
| 6 hpi :No FISH Control vs. 8 hpi :Biotin Control       | 0.9966                            |
| 6 hpi :No FISH Control vs. 8 hpi :No FISH Control      | >0.9999                           |
| 6 hpi :No FISH Control vs. 8 hpi :Mock Control         | >0.9999                           |
| 6 hpi :Mock Control vs. 8 hpi :RSV genome-L            | 0.0416                            |
| 6 hpi :Mock Control vs. 8 hpi :No Primary Control      | >0.9999                           |
| 6 hpi :Mock Control vs. 8 hpi :No V5 Control           | >0.9999                           |
| 6 hpi :Mock Control vs. 8 hpi :Scrambled Control       | >0.9999                           |
| 6 hpi :Mock Control vs. 8 hpi :Biotin Control          | >0.9999                           |
| 6 hpi :Mock Control vs. 8 hpi :No FISH Control         | >0.9999                           |
| 6 hpi :Mock Control vs. 8 hpi :Mock Control            | >0.9999                           |
| 8 hpi :RSV genome-L vs. 8 hpi :No Primary Control      | 0.0044                            |
| 8 hpi :RSV genome-L vs. 8 hpi :No V5 Control           | 0.0143                            |
| 8 hpi :RSV genome-L vs. 8 hpi :Scrambled Control       | 0.0012                            |
| 8 hpi :RSV genome-L vs. 8 hpi :Biotin Control          | 0.0676                            |
| 8 hpi :RSV genome-L vs. 8 hpi :No FISH Control         | 0.008                             |
| 8 hpi :RSV genome-L vs. 8 hpi :Mock Control            | 0.0012                            |
| 8 hpi :No Primary Control vs. 8 hpi :No V5 Control     | >0.9999                           |
| 8 hpi :No Primary Control vs. 8 hpi :Scrambled Control | >0.9999                           |
| 8 hpi :No Primary Control vs. 8 hpi :Biotin Control    | >0.9999                           |
| 8 hpi :No Primary Control vs. 8 hpi :No FISH Control   | >0.9999                           |
| 8 hpi :No Primary Control vs. 8 hpi :Mock Control      | >0.9999                           |
| 8 hpi :No V5 Control vs. 8 hpi :Biotin Control         | >0.9999                           |
| 8 hpi :No V5 Control vs. 8 hpi :No FISH Control        | >0.9999                           |
| 8 hpi :No V5 Control vs. 8 hpi :Mock Control           | >0.9999                           |
| 8 hpi :Scrambled Control vs. 8 hpi :Biotin Control     | >0.9999                           |
| 8 hpi :Scrambled Control vs. 8 hpi :No FISH Control    | >0.9999                           |
| 8 hpi :Scrambled Control vs. 8 hpi :Mock Control       | >0.9999                           |
| 8 hpi :Biotin Control vs. 8 hpi :No FISH Control       | >0.9999                           |
| 8 hpi :Biotin Control vs. 8 hpi :Mock Control          | >0.9999                           |
| 8 hpi :No FISH Control vs. 8 hpi :Mock Control         | >0.9999                           |
|                                                        |                                   |
| <b>Graph Title</b>                                     | RSV genome-L PLA (Normalized PLA) |
| <b>Comparison</b>                                      | <b>P Value</b>                    |
| 6 hpi                                                  |                                   |
| RSV genome-L vs. No Primary Control                    | 0.0003                            |
| RSV genome-L vs. No V5 Control                         | <0.0001                           |
| RSV genome-L vs. Scrambled Control                     | <0.0001                           |

|                                                         |                                     |
|---------------------------------------------------------|-------------------------------------|
| RSV genome-L vs. Biotin Control                         | <0.0001                             |
| RSV genome-L vs. No FISH Control                        | <0.0001                             |
| No Primary Control vs. No V5 Control                    | 0.895                               |
| No Primary Control vs. Scrambled Control                | 0.9837                              |
| No Primary Control vs. Biotin Control                   | 0.9998                              |
| No Primary Control vs. No FISH Control                  | 0.8005                              |
| No V5 Control vs. Scrambled Control                     | 0.9989                              |
| No V5 Control vs. Biotin Control                        | 0.9676                              |
| No V5 Control vs. No FISH Control                       | >0.9999                             |
| Scrambled Control vs. Biotin Control                    | 0.9985                              |
| Scrambled Control vs. No FISH Control                   | 0.9912                              |
| Biotin Control vs. No FISH Control                      | 0.9148                              |
| 8 hpi                                                   | <0.0001                             |
| RSV genome-L vs. No Primary Control                     | <0.0001                             |
| RSV genome-L vs. No V5 Control                          | <0.0001                             |
| RSV genome-L vs. Scrambled Control                      | 0.0006                              |
| RSV genome-L vs. Biotin Control                         | <0.0001                             |
| RSV genome-L vs. No FISH Control                        | 0.9994                              |
| No Primary Control vs. No V5 Control                    | 0.9997                              |
| No Primary Control vs. Scrambled Control                | 0.9945                              |
| No Primary Control vs. Biotin Control                   | >0.9999                             |
| No Primary Control vs. No FISH Control                  | >0.9999                             |
| No V5 Control vs. Scrambled Control                     | 0.9518                              |
| No V5 Control vs. Biotin Control                        | 0.9977                              |
| No V5 Control vs. No FISH Control                       | 0.9605                              |
| Scrambled Control vs. Biotin Control                    | 0.9985                              |
| Scrambled Control vs. No FISH Control                   | 0.9982                              |
| Biotin Control vs. No FISH Control                      |                                     |
|                                                         |                                     |
| <b>Graph Title</b>                                      | <b>NS1 mRNA-L PLA (# of Puncta)</b> |
| <b>Comparison</b>                                       | <b>P Value</b>                      |
| 6 hpi :NS1 mRNA-L vs. 6 hpi :No Primary Control         | <0.0001                             |
| 6 hpi :NS1 mRNA-L vs. 6 hpi :No V5 Control              | <0.0001                             |
| 6 hpi :NS1 mRNA-L vs. 6 hpi :Scrambled Control          | <0.0001                             |
| 6 hpi :NS1 mRNA-L vs. 6 hpi :Biotin Control             | <0.0001                             |
| 6 hpi :NS1 mRNA-L vs. 6 hpi :No FISH Control            | <0.0001                             |
| 6 hpi :NS1 mRNA-L vs. 6 hpi :Mock Control               | <0.0001                             |
| 6 hpi :NS1 mRNA-L vs. 8 hpi :NS1 mRNA-L                 | <0.0001                             |
| 6 hpi :NS1 mRNA-L vs. 8 hpi :No Primary Control         | <0.0001                             |
| 6 hpi :NS1 mRNA-L vs. 8 hpi :No V5 Control              | <0.0001                             |
| 6 hpi :NS1 mRNA-L vs. 8 hpi :Scrambled Control          | <0.0001                             |
| 6 hpi :NS1 mRNA-L vs. 8 hpi :Biotin Control             | <0.0001                             |
| 6 hpi :NS1 mRNA-L vs. 8 hpi :No FISH Control            | <0.0001                             |
| 6 hpi :NS1 mRNA-L vs. 8 hpi :Mock Control               | <0.0001                             |
| 6 hpi :No Primary Control vs. 6 hpi :No V5 Control      | >0.9999                             |
| 6 hpi :No Primary Control vs. 6 hpi :Scrambled Control  | >0.9999                             |
| 6 hpi :No Primary Control vs. 6 hpi :Biotin Control     | >0.9999                             |
| 6 hpi :No Primary Control vs. 6 hpi :No FISH Control    | >0.9999                             |
| 6 hpi :No Primary Control vs. 6 hpi :Mock Control       | 0.1407                              |
| 6 hpi :No Primary Control vs. 8 hpi :NS1 mRNA-L         | <0.0001                             |
| 6 hpi :No Primary Control vs. 8 hpi :No Primary Control | >0.9999                             |
| 6 hpi :No Primary Control vs. 8 hpi :No V5 Control      | >0.9999                             |
| 6 hpi :No Primary Control vs. 8 hpi :Scrambled Control  | >0.9999                             |
| 6 hpi :No Primary Control vs. 8 hpi :Biotin Control     | 0.9996                              |

|                                                        |         |
|--------------------------------------------------------|---------|
| 6 hpi :No Primary Control vs. 8 hpi :No FISH Control   | >0.9999 |
| 6 hpi :No Primary Control vs. 8 hpi :Mock Control      | 0.0011  |
| 6 hpi :No V5 Control vs. 6 hpi :Scrambled Control      | >0.9999 |
| 6 hpi :No V5 Control vs. 6 hpi :Biotin Control         | >0.9999 |
| 6 hpi :No V5 Control vs. 6 hpi :No FISH Control        | 0.9993  |
| 6 hpi :No V5 Control vs. 6 hpi :Mock Control           | 0.46    |
| 6 hpi :No V5 Control vs. 8 hpi :NS1 mRNA-L             | <0.0001 |
| 6 hpi :No V5 Control vs. 8 hpi :No Primary Control     | >0.9999 |
| 6 hpi :No V5 Control vs. 8 hpi :No V5 Control          | >0.9999 |
| 6 hpi :No V5 Control vs. 8 hpi :Scrambled Control      | >0.9999 |
| 6 hpi :No V5 Control vs. 8 hpi :Biotin Control         | >0.9999 |
| 6 hpi :No V5 Control vs. 8 hpi :No FISH Control        | >0.9999 |
| 6 hpi :No V5 Control vs. 8 hpi :Mock Control           | 0.0099  |
| 6 hpi :Scrambled Control vs. 6 hpi :Biotin Control     | >0.9999 |
| 6 hpi :Scrambled Control vs. 6 hpi :No FISH Control    | >0.9999 |
| 6 hpi :Scrambled Control vs. 6 hpi :Mock Control       | 0.1679  |
| 6 hpi :Scrambled Control vs. 8 hpi :NS1 mRNA-L         | <0.0001 |
| 6 hpi :Scrambled Control vs. 8 hpi :No Primary Control | >0.9999 |
| 6 hpi :Scrambled Control vs. 8 hpi :No V5 Control      | >0.9999 |
| 6 hpi :Scrambled Control vs. 8 hpi :Scrambled Control  | >0.9999 |
| 6 hpi :Scrambled Control vs. 8 hpi :Biotin Control     | 0.9998  |
| 6 hpi :Scrambled Control vs. 8 hpi :No FISH Control    | >0.9999 |
| 6 hpi :Scrambled Control vs. 8 hpi :Mock Control       | 0.0014  |
| 6 hpi :Biotin Control vs. 6 hpi :No FISH Control       | >0.9999 |
| 6 hpi :Biotin Control vs. 6 hpi :Mock Control          | 0.2722  |
| 6 hpi :Biotin Control vs. 8 hpi :NS1 mRNA-L            | <0.0001 |
| 6 hpi :Biotin Control vs. 8 hpi :No Primary Control    | >0.9999 |
| 6 hpi :Biotin Control vs. 8 hpi :No V5 Control         | >0.9999 |
| 6 hpi :Biotin Control vs. 8 hpi :Scrambled Control     | >0.9999 |
| 6 hpi :Biotin Control vs. 8 hpi :Biotin Control        | >0.9999 |
| 6 hpi :Biotin Control vs. 8 hpi :No FISH Control       | >0.9999 |
| 6 hpi :Biotin Control vs. 8 hpi :Mock Control          | 0.0034  |
| 6 hpi :No FISH Control vs. 6 hpi :Mock Control         | 0.0014  |
| 6 hpi :No FISH Control vs. 8 hpi :NS1 mRNA-L           | <0.0001 |
| 6 hpi :No FISH Control vs. 8 hpi :No Primary Control   | >0.9999 |
| 6 hpi :No FISH Control vs. 8 hpi :No V5 Control        | 0.9998  |
| 6 hpi :No FISH Control vs. 8 hpi :Scrambled Control    | >0.9999 |
| 6 hpi :No FISH Control vs. 8 hpi :Biotin Control       | 0.5664  |
| 6 hpi :No FISH Control vs. 8 hpi :No FISH Control      | >0.9999 |
| 6 hpi :No FISH Control vs. 8 hpi :Mock Control         | <0.0001 |
| 6 hpi :Mock Control vs. 8 hpi :NS1 mRNA-L              | 0.2336  |
| 6 hpi :Mock Control vs. 8 hpi :No Primary Control      | 0.2722  |
| 6 hpi :Mock Control vs. 8 hpi :No V5 Control           | 0.3602  |
| 6 hpi :Mock Control vs. 8 hpi :Scrambled Control       | 0.0334  |
| 6 hpi :Mock Control vs. 8 hpi :Biotin Control          | 0.9973  |
| 6 hpi :Mock Control vs. 8 hpi :No FISH Control         | 0.117   |
| 6 hpi :Mock Control vs. 8 hpi :Mock Control            | >0.9999 |
| 8 hpi :NS1 mRNA-L vs. 8 hpi :No Primary Control        | <0.0001 |
| 8 hpi :NS1 mRNA-L vs. 8 hpi :No V5 Control             | <0.0001 |
| 8 hpi :NS1 mRNA-L vs. 8 hpi :Scrambled Control         | <0.0001 |
| 8 hpi :NS1 mRNA-L vs. 8 hpi :Biotin Control            | 0.0002  |
| 8 hpi :NS1 mRNA-L vs. 8 hpi :No FISH Control           | <0.0001 |
| 8 hpi :NS1 mRNA-L vs. 8 hpi :Mock Control              | 0.9866  |
| 8 hpi :No Primary Control vs. 8 hpi :No V5 Control     | >0.9999 |

|                                                        |                                 |
|--------------------------------------------------------|---------------------------------|
| 8 hpi :No Primary Control vs. 8 hpi :Scrambled Control | >0.9999                         |
| 8 hpi :No Primary Control vs. 8 hpi :Biotin Control    | >0.9999                         |
| 8 hpi :No Primary Control vs. 8 hpi :No FISH Control   | >0.9999                         |
| 8 hpi :No Primary Control vs. 8 hpi :Mock Control      | 0.0034                          |
| 8 hpi :No V5 Control vs. 8 hpi :Scrambled Control      | >0.9999                         |
| 8 hpi :No V5 Control vs. 8 hpi :Biotin Control         | >0.9999                         |
| 8 hpi :No V5 Control vs. 8 hpi :No FISH Control        | >0.9999                         |
| 8 hpi :No V5 Control vs. 8 hpi :Mock Control           | 0.0058                          |
| 8 hpi :Scrambled Control vs. 8 hpi :Biotin Control     | 0.979                           |
| 8 hpi :Scrambled Control vs. 8 hpi :No FISH Control    | >0.9999                         |
| 8 hpi :Scrambled Control vs. 8 hpi :Mock Control       | 0.0001                          |
| 8 hpi :Biotin Control vs. 8 hpi :No FISH Control       | 0.9993                          |
| 8 hpi :Biotin Control vs. 8 hpi :Mock Control          | 0.3602                          |
| 8 hpi :No FISH Control vs. 8 hpi :Mock Control         | 0.0008                          |
|                                                        |                                 |
| <b>Graph Title</b>                                     | NS1 mRNA-L PLA (Normalized PLA) |
| <b>Comparison</b>                                      | <b>P Value</b>                  |
| 6 hpi                                                  |                                 |
| NS1 mRNA-L vs. No Primary Control                      | <0.0001                         |
| NS1 mRNA-L vs. No V5 Control                           | <0.0001                         |
| NS1 mRNA-L vs. Scrambled Control                       | <0.0001                         |
| NS1 mRNA-L vs. Biotin Control                          | <0.0001                         |
| NS1 mRNA-L vs. No FISH Control                         | <0.0001                         |
| No Primary Control vs. No V5 Control                   | 0.7602                          |
| No Primary Control vs. Scrambled Control               | >0.9999                         |
| No Primary Control vs. Biotin Control                  | 0.9952                          |
| No Primary Control vs. No FISH Control                 | 0.9557                          |
| No V5 Control vs. Scrambled Control                    | 0.7358                          |
| No V5 Control vs. Biotin Control                       | 0.9638                          |
| No V5 Control vs. No FISH Control                      | 0.2367                          |
| Scrambled Control vs. Biotin Control                   | 0.9932                          |
| Scrambled Control vs. No FISH Control                  | 0.9641                          |
| Biotin Control vs. No FISH Control                     | 0.7368                          |
| 8 hpi                                                  | 0.2007                          |
| NS1 mRNA-L vs. No Primary Control                      | 0.5055                          |
| NS1 mRNA-L vs. No V5 Control                           | 0.0006                          |
| NS1 mRNA-L vs. Scrambled Control                       | 0.0362                          |
| NS1 mRNA-L vs. Biotin Control                          | 0.0054                          |
| NS1 mRNA-L vs. No FISH Control                         | 0.9942                          |
| No Primary Control vs. No V5 Control                   | 0.447                           |
| No Primary Control vs. Scrambled Control               | 0.9839                          |
| No Primary Control vs. Biotin Control                  | 0.8028                          |
| No Primary Control vs. No FISH Control                 | 0.1658                          |
| No V5 Control vs. Scrambled Control                    | 0.823                           |
| No V5 Control vs. Biotin Control                       | 0.4574                          |
| No V5 Control vs. No FISH Control                      | 0.8612                          |
| Scrambled Control vs. Biotin Control                   | 0.9934                          |
| Scrambled Control vs. No FISH Control                  | 0.992                           |
| Biotin Control vs. No FISH Control                     |                                 |

| <b>Figure 6B</b>                       |                              |
|----------------------------------------|------------------------------|
| <b>Graph Title</b>                     | <b>N-L PLA (# of Puncta)</b> |
| <b>Comparison</b>                      | <b>P Value</b>               |
| Row 1:N-L vs. Row 1:No Primary Control | >0.9999                      |

|                                                       |         |
|-------------------------------------------------------|---------|
| Row 1:N-L vs. Row 1:Mock Control                      | 0.0057  |
| Row 1:N-L vs. Row 2:N-L                               | 0.315   |
| Row 1:N-L vs. Row 2:No Primary Control                | 0.0019  |
| Row 1:N-L vs. Row 2:Mock Control                      | 0.0225  |
| Row 1:N-L vs. Row 3:N-L                               | <0.0001 |
| Row 1:N-L vs. Row 3:No Primary Control                | 0.3491  |
| Row 1:N-L vs. Row 3:Mock Control                      | 0.385   |
| Row 1:N-L vs. Row 4:N-L                               | 0.0865  |
| Row 1:N-L vs. Row 4:No Primary Control                | 0.6207  |
| Row 1:N-L vs. Row 4:Mock Control                      | 0.0002  |
| Row 1:No Primary Control vs. Row 1:Mock Control       | 0.0187  |
| Row 1:No Primary Control vs. Row 2:N-L                | 0.5405  |
| Row 1:No Primary Control vs. Row 2:No Primary Control | 0.007   |
| Row 1:No Primary Control vs. Row 2:Mock Control       | 0.0633  |
| Row 1:No Primary Control vs. Row 3:N-L                | <0.0001 |
| Row 1:No Primary Control vs. Row 3:No Primary Control | 0.5807  |
| Row 1:No Primary Control vs. Row 3:Mock Control       | 0.6207  |
| Row 1:No Primary Control vs. Row 4:N-L                | 0.1987  |
| Row 1:No Primary Control vs. Row 4:No Primary Control | 0.8325  |
| Row 1:No Primary Control vs. Row 4:Mock Control       | 0.0008  |
| Row 1:Mock Control vs. Row 2:N-L                      | 0.966   |
| Row 1:Mock Control vs. Row 2:No Primary Control       | >0.9999 |
| Row 1:Mock Control vs. Row 2:Mock Control             | >0.9999 |
| Row 1:Mock Control vs. Row 3:N-L                      | <0.0001 |
| Row 1:Mock Control vs. Row 3:No Primary Control       | 0.9549  |
| Row 1:Mock Control vs. Row 3:Mock Control             | 0.9414  |
| Row 1:Mock Control vs. Row 4:N-L                      | 0.9996  |
| Row 1:Mock Control vs. Row 4:No Primary Control       | 0.8023  |
| Row 1:Mock Control vs. Row 4:Mock Control             | 0.9996  |
| Row 2:N-L vs. Row 2:No Primary Control                | 0.8846  |
| Row 2:N-L vs. Row 2:Mock Control                      | 0.9977  |
| Row 2:N-L vs. Row 3:N-L                               | <0.0001 |
| Row 2:N-L vs. Row 3:No Primary Control                | >0.9999 |
| Row 2:N-L vs. Row 3:Mock Control                      | >0.9999 |
| Row 2:N-L vs. Row 4:N-L                               | >0.9999 |
| Row 2:N-L vs. Row 4:No Primary Control                | >0.9999 |
| Row 2:N-L vs. Row 4:Mock Control                      | 0.5405  |
| Row 2:No Primary Control vs. Row 2:Mock Control       | >0.9999 |
| Row 2:No Primary Control vs. Row 3:N-L                | <0.0001 |
| Row 2:No Primary Control vs. Row 3:No Primary Control | 0.8599  |
| Row 2:No Primary Control vs. Row 3:Mock Control       | 0.8325  |
| Row 2:No Primary Control vs. Row 4:N-L                | 0.9942  |
| Row 2:No Primary Control vs. Row 4:No Primary Control | 0.6207  |
| Row 2:No Primary Control vs. Row 4:Mock Control       | >0.9999 |
| Row 2:Mock Control vs. Row 3:N-L                      | <0.0001 |
| Row 2:Mock Control vs. Row 3:No Primary Control       | 0.9963  |
| Row 2:Mock Control vs. Row 3:Mock Control             | 0.9942  |
| Row 2:Mock Control vs. Row 4:N-L                      | >0.9999 |
| Row 2:Mock Control vs. Row 4:No Primary Control       | 0.9549  |
| Row 2:Mock Control vs. Row 4:Mock Control             | 0.9873  |
| Row 3:N-L vs. Row 3:No Primary Control                | <0.0001 |
| Row 3:N-L vs. Row 3:Mock Control                      | <0.0001 |
| Row 3:N-L vs. Row 4:N-L                               | <0.0001 |
| Row 3:N-L vs. Row 4:No Primary Control                | <0.0001 |

|                                                       |         |
|-------------------------------------------------------|---------|
| Row 3:N-L vs. Row 4:Mock Control                      | 0.0001  |
| Row 3:No Primary Control vs. Row 3:Mock Control       | >0.9999 |
| Row 3:No Primary Control vs. Row 4:N-L                | >0.9999 |
| Row 3:No Primary Control vs. Row 4:No Primary Control | >0.9999 |
| Row 3:No Primary Control vs. Row 4:Mock Control       | 0.5004  |
| Row 3:Mock Control vs. Row 4:N-L                      | >0.9999 |
| Row 3:Mock Control vs. Row 4:No Primary Control       | >0.9999 |
| Row 3:Mock Control vs. Row 4:Mock Control             | 0.4609  |
| Row 4:N-L vs. Row 4:No Primary Control                | 0.9977  |
| Row 4:N-L vs. Row 4:Mock Control                      | 0.8846  |
| Row 4:No Primary Control vs. Row 4:Mock Control       | 0.2527  |

| <b>Graph Title</b>                                    | <b>N-L PLA (Normalized PLA)</b> |
|-------------------------------------------------------|---------------------------------|
| <b>Comparison</b>                                     | <b>P Value</b>                  |
| Row 1:N-L vs. Row 1:No Primary Control                | 0.6865                          |
| Row 1:N-L vs. Row 2:N-L                               | 0.0744                          |
| Row 1:N-L vs. Row 2:No Primary Control                | 0.0281                          |
| Row 1:N-L vs. Row 3:N-L                               | 0.0003                          |
| Row 1:N-L vs. Row 3:No Primary Control                | 0.7546                          |
| Row 1:N-L vs. Row 4:N-L                               | 0.9679                          |
| Row 1:N-L vs. Row 4:No Primary Control                | >0.9999                         |
| Row 1:No Primary Control vs. Row 2:N-L                | 0.0002                          |
| Row 1:No Primary Control vs. Row 2:No Primary Control | <0.0001                         |
| Row 1:No Primary Control vs. Row 3:N-L                | <0.0001                         |
| Row 1:No Primary Control vs. Row 3:No Primary Control | >0.9999                         |
| Row 1:No Primary Control vs. Row 4:N-L                | 0.1212                          |
| Row 1:No Primary Control vs. Row 4:No Primary Control | 0.6052                          |
| Row 2:N-L vs. Row 2:No Primary Control                | >0.9999                         |
| Row 2:N-L vs. Row 3:N-L                               | 0.756                           |
| Row 2:N-L vs. Row 3:No Primary Control                | 0.0003                          |
| Row 2:N-L vs. Row 4:N-L                               | 0.5693                          |
| Row 2:N-L vs. Row 4:No Primary Control                | 0.1025                          |
| Row 2:No Primary Control vs. Row 3:N-L                | 0.928                           |
| Row 2:No Primary Control vs. Row 3:No Primary Control | <0.0001                         |
| Row 2:No Primary Control vs. Row 4:N-L                | 0.341                           |
| Row 2:No Primary Control vs. Row 4:No Primary Control | 0.0406                          |
| Row 3:N-L vs. Row 3:No Primary Control                | <0.0001                         |
| Row 3:N-L vs. Row 4:N-L                               | 0.0144                          |
| Row 3:N-L vs. Row 4:No Primary Control                | 0.0005                          |
| Row 3:No Primary Control vs. Row 4:N-L                | 0.1502                          |
| Row 3:No Primary Control vs. Row 4:No Primary Control | 0.6768                          |
| Row 4:N-L vs. Row 4:No Primary Control                | 0.9844                          |

| <b>Figure 6C</b>   |                              |
|--------------------|------------------------------|
| <b>Graph Title</b> | <b>N-L Centroid Distance</b> |
| <b>Comparison</b>  | <b>P Value</b>               |
| 6 hpi vs 8 hpi     | <0.0001                      |

| <b>Figure 7B</b>                 |                                       |
|----------------------------------|---------------------------------------|
| <b>Graph Title</b>               | <b>RSV genome-L PLA (# of Puncta)</b> |
| <b>Comparison</b>                | <b>P Value</b>                        |
| M2-2-Myc mRNA                    |                                       |
| RSVg-L vs. No Primary Control    | <0.0001                               |
| RSVg-L vs. Mock Infected Control | 0.7904                                |



|                                              |                                   |
|----------------------------------------------|-----------------------------------|
| No Primary Control vs. Mock Infected Control | <0.0001                           |
| M2-1-HA mRNA                                 |                                   |
| RSVg-L vs. No Primary Control                | <0.0001                           |
| RSVg-L vs. Mock Infected Control             | <0.0001                           |
| No Primary Control vs. Mock Infected Control | <0.0001                           |
|                                              |                                   |
| <b>Graph Title</b>                           | RSV genome-L PLA (Normalized PLA) |
| <b>Comparison</b>                            | <b>P Value</b>                    |
| M2-2 Myc RNA RSVg-L vs. No Primary Control   | 0.1579                            |
| M2-1 HA RNA RSVg-L vs. No Primary Control    | <0.0001                           |
|                                              |                                   |
| <b>Graph Title</b>                           | NS1 mRNA-L PLA (# of Puncta)      |
| <b>Comparison</b>                            | <b>P Value</b>                    |
| M2-2-Myc mRNA                                |                                   |
| NS1-L vs. No Primary Control                 | <0.0001                           |
| NS1-L vs. Mock Infected Control              | 0.8752                            |
| No Primary Control vs. Mock Infected Control | <0.0001                           |
| M2-1-HA mRNA                                 |                                   |
| NS1-L vs. No Primary Control                 | <0.0001                           |
| NS1-L vs. Mock Infected Control              | <0.0001                           |
| No Primary Control vs. Mock Infected Control | 0.006                             |
|                                              |                                   |
| <b>Graph Title</b>                           | NS1 mRNA-L PLA (Normalized PLA)   |
| <b>Comparison</b>                            | <b>P Value</b>                    |
| M2-2 Myc NS1-L vs. No Primary Control        | 0.758                             |
| M2-1 HA NS1-L vs. No Primary Control         | <0.0001                           |

| <b>Figure S3B</b>                    |                |
|--------------------------------------|----------------|
| <b>Graph Title</b>                   | N-L PLA        |
| <b>Comparison</b>                    | <b>P Value</b> |
| 1 hpi                                |                |
| RSV-FI(2)-L vs. Mock Infected        | 0.9993         |
| RSV-FI(2)-L vs. No Primary Control   | 0.7023         |
| Mock Infected vs. No Primary Control | 0.6806         |
| 6 hpi                                |                |
| RSV-FI(2)-L vs. Mock Infected        | 0.025          |
| RSV-FI(2)-L vs. No Primary Control   | 0.0032         |
| Mock Infected vs. No Primary Control | 0.7856         |
| 8 hpi                                |                |
| RSV-FI(2)-L vs. Mock Infected        | 0.516          |
| RSV-FI(2)-L vs. No Primary Control   | 0.4486         |
| Mock Infected vs. No Primary Control | 0.9921         |
| 12 hpi                               |                |
| RSV-FI(2)-L vs. Mock Infected        | <0.0001        |
| RSV-FI(2)-L vs. No Primary Control   | <0.0001        |
| Mock Infected vs. No Primary Control | 0.1555         |
| 18 hpi                               |                |
| RSV-FI(2)-L vs. Mock Infected        | <0.0001        |
| RSV-FI(2)-L vs. No Primary Control   | <0.0001        |
| Mock Infected vs. No Primary Control | 0.8688         |
| 24 hpi                               |                |
| RSV-FI(2)-L vs. Mock Infected        | <0.0001        |
| RSV-FI(2)-L vs. No Primary Control   | <0.0001        |
| Mock Infected vs. No Primary Control | 0.5926         |

| Graph Title        | N-L PLA # of Puncta |
|--------------------|---------------------|
| Comparison         | P Value             |
| RSV-FI(2)-L        |                     |
| 1 hpi vs. 6 hpi    | 0.0012              |
| 1 hpi vs. 8 hpi    | 0.9966              |
| 1 hpi vs. 12 hpi   | <0.0001             |
| 1 hpi vs. 18 hpi   | <0.0001             |
| 1 hpi vs. 24 hpi   | <0.0001             |
| 6 hpi vs. 8 hpi    | 0.0075              |
| 6 hpi vs. 12 hpi   | 0.5506              |
| 6 hpi vs. 18 hpi   | 0.322               |
| 6 hpi vs. 24 hpi   | <0.0001             |
| 8 hpi vs. 12 hpi   | <0.0001             |
| 8 hpi vs. 18 hpi   | <0.0001             |
| 8 hpi vs. 24 hpi   | <0.0001             |
| 12 hpi vs. 18 hpi  | 0.9991              |
| 12 hpi vs. 24 hpi  | <0.0001             |
| 18 hpi vs. 24 hpi  | <0.0001             |
| Mock Infected      |                     |
| 1 hpi vs. 6 hpi    | 0.7413              |
| 1 hpi vs. 8 hpi    | 0.9926              |
| 1 hpi vs. 12 hpi   | 0.9976              |
| 1 hpi vs. 18 hpi   | 0.9966              |
| 1 hpi vs. 24 hpi   | 0.9998              |
| 6 hpi vs. 8 hpi    | 0.3721              |
| 6 hpi vs. 12 hpi   | 0.4477              |
| 6 hpi vs. 18 hpi   | 0.9492              |
| 6 hpi vs. 24 hpi   | 0.8751              |
| 8 hpi vs. 12 hpi   | >0.9999             |
| 8 hpi vs. 18 hpi   | 0.8959              |
| 8 hpi vs. 24 hpi   | 0.9606              |
| 12 hpi vs. 18 hpi  | 0.9357              |
| 12 hpi vs. 24 hpi  | 0.9802              |
| 18 hpi vs. 24 hpi  | >0.9999             |
| No Primary Control |                     |
| 1 hpi vs. 6 hpi    | >0.9999             |
| 1 hpi vs. 8 hpi    | 0.6518              |
| 1 hpi vs. 12 hpi   | 0.9936              |
| 1 hpi vs. 18 hpi   | 0.957               |
| 1 hpi vs. 24 hpi   | 0.9987              |
| 6 hpi vs. 8 hpi    | 0.7279              |
| 6 hpi vs. 12 hpi   | 0.9842              |
| 6 hpi vs. 18 hpi   | 0.978               |
| 6 hpi vs. 24 hpi   | 0.9953              |
| 8 hpi vs. 12 hpi   | 0.3035              |
| 8 hpi vs. 18 hpi   | 0.9848              |
| 8 hpi vs. 24 hpi   | 0.3929              |
| 12 hpi vs. 18 hpi  | 0.7202              |
| 12 hpi vs. 24 hpi  | >0.9999             |
| 18 hpi vs. 24 hpi  | 0.8095              |
|                    |                     |
| Graph Title        | P-L PLA             |
| Comparison         | P Value             |

|                                      |                            |
|--------------------------------------|----------------------------|
| 1 hpi                                |                            |
| RSV-FI(2)-L vs. Mock Infected        | 0.0704                     |
| RSV-FI(2)-L vs. No Primary Control   | 0.0959                     |
| Mock Infected vs. No Primary Control | 0.9901                     |
| 6 hpi                                |                            |
| RSV-FI(2)-L vs. Mock Infected        | 0.0151                     |
| RSV-FI(2)-L vs. No Primary Control   | 0.0157                     |
| Mock Infected vs. No Primary Control | 0.9999                     |
| 8 hpi                                |                            |
| RSV-FI(2)-L vs. Mock Infected        | 0.9082                     |
| RSV-FI(2)-L vs. No Primary Control   | 0.9383                     |
| Mock Infected vs. No Primary Control | 0.9969                     |
| 12 hpi                               |                            |
| RSV-FI(2)-L vs. Mock Infected        | 0.0005                     |
| RSV-FI(2)-L vs. No Primary Control   | 0.0002                     |
| Mock Infected vs. No Primary Control | 0.952                      |
| 18 hpi                               |                            |
| RSV-FI(2)-L vs. Mock Infected        | <0.0001                    |
| RSV-FI(2)-L vs. No Primary Control   | <0.0001                    |
| Mock Infected vs. No Primary Control | 0.952                      |
| 24 hpi                               |                            |
| RSV-FI(2)-L vs. Mock Infected        | <0.0001                    |
| RSV-FI(2)-L vs. No Primary Control   | <0.0001                    |
| Mock Infected vs. No Primary Control | 0.7268                     |
|                                      |                            |
| <b>Graph Title</b>                   | <b>P-L PLA # of Puncta</b> |
| <b>Comparison</b>                    | <b>P Value</b>             |
| RSV-FI(2)-L                          |                            |
| 1 hpi vs. 6 hpi                      | 0.9991                     |
| 1 hpi vs. 8 hpi                      | 0.0292                     |
| 1 hpi vs. 12 hpi                     | 0.1323                     |
| 1 hpi vs. 18 hpi                     | <0.0001                    |
| 1 hpi vs. 24 hpi                     | <0.0001                    |
| 6 hpi vs. 8 hpi                      | 0.0088                     |
| 6 hpi vs. 12 hpi                     | 0.286                      |
| 6 hpi vs. 18 hpi                     | <0.0001                    |
| 6 hpi vs. 24 hpi                     | <0.0001                    |
| 8 hpi vs. 12 hpi                     | <0.0001                    |
| 8 hpi vs. 18 hpi                     | <0.0001                    |
| 8 hpi vs. 24 hpi                     | <0.0001                    |
| 12 hpi vs. 18 hpi                    | 0.0995                     |
| 12 hpi vs. 24 hpi                    | <0.0001                    |
| 18 hpi vs. 24 hpi                    | <0.0001                    |
| Mock Infected                        |                            |
| 1 hpi vs. 6 hpi                      | 0.9998                     |
| 1 hpi vs. 8 hpi                      | 0.8095                     |
| 1 hpi vs. 12 hpi                     | 0.9437                     |
| 1 hpi vs. 18 hpi                     | 0.9474                     |
| 1 hpi vs. 24 hpi                     | 0.9998                     |
| 6 hpi vs. 8 hpi                      | 0.9342                     |
| 6 hpi vs. 12 hpi                     | 0.855                      |
| 6 hpi vs. 18 hpi                     | 0.9912                     |
| 6 hpi vs. 24 hpi                     | >0.9999                    |
| 8 hpi vs. 12 hpi                     | 0.256                      |

|                    |         |
|--------------------|---------|
| 8 hpi vs. 18 hpi   | 0.9992  |
| 8 hpi vs. 24 hpi   | 0.9271  |
| 12 hpi vs. 18 hpi  | 0.4622  |
| 12 hpi vs. 24 hpi  | 0.8394  |
| 18 hpi vs. 24 hpi  | 0.9901  |
| No Primary Control |         |
| 1 hpi vs. 6 hpi    | 0.9984  |
| 1 hpi vs. 8 hpi    | 0.7837  |
| 1 hpi vs. 12 hpi   | 0.9969  |
| 1 hpi vs. 18 hpi   | 0.978   |
| 1 hpi vs. 24 hpi   | 0.9994  |
| 6 hpi vs. 8 hpi    | 0.9595  |
| 6 hpi vs. 12 hpi   | 0.9517  |
| 6 hpi vs. 18 hpi   | 0.9997  |
| 6 hpi vs. 24 hpi   | 0.9757  |
| 8 hpi vs. 12 hpi   | 0.4821  |
| 8 hpi vs. 18 hpi   | 0.9925  |
| 8 hpi vs. 24 hpi   | 0.5704  |
| 12 hpi vs. 18 hpi  | 0.8322  |
| 12 hpi vs. 24 hpi  | >0.9999 |
| 18 hpi vs. 24 hpi  | 0.8912  |

| Graph Title                          | M2-1-L PLA |
|--------------------------------------|------------|
| Comparison                           | P Value    |
| 1 hpi                                |            |
| RSV-FI(2)-L vs. Mock Infected        | 0.0329     |
| RSV-FI(2)-L vs. No Primary Control   | 0.0722     |
| Mock Infected vs. No Primary Control | 0.9468     |
| 6 hpi                                |            |
| RSV-FI(2)-L vs. Mock Infected        | 0.4135     |
| RSV-FI(2)-L vs. No Primary Control   | 0.064      |
| Mock Infected vs. No Primary Control | 0.6408     |
| 8 hpi                                |            |
| RSV-FI(2)-L vs. Mock Infected        | 0.208      |
| RSV-FI(2)-L vs. No Primary Control   | 0.5703     |
| Mock Infected vs. No Primary Control | 0.7811     |
| 12 hpi                               |            |
| RSV-FI(2)-L vs. Mock Infected        | <0.0001    |
| RSV-FI(2)-L vs. No Primary Control   | <0.0001    |
| Mock Infected vs. No Primary Control | 0.8591     |
| 18 hpi                               |            |
| RSV-FI(2)-L vs. Mock Infected        | <0.0001    |
| RSV-FI(2)-L vs. No Primary Control   | <0.0001    |
| Mock Infected vs. No Primary Control | 0.976      |
| 24 hpi                               |            |
| RSV-FI(2)-L vs. Mock Infected        | <0.0001    |
| RSV-FI(2)-L vs. No Primary Control   | <0.0001    |
| Mock Infected vs. No Primary Control | 0.1004     |

| Graph Title     | M2-1-L PLA # of Puncta |
|-----------------|------------------------|
| Comparison      | P Value                |
| RSV-FI(2)-L     |                        |
| 1 hpi vs. 6 hpi | >0.9999                |
| 1 hpi vs. 8 hpi | 0.1268                 |

|                               |              |
|-------------------------------|--------------|
| 1 hpi vs. 12 hpi              | 0.0002       |
| 1 hpi vs. 18 hpi              | 0.0038       |
| 1 hpi vs. 24 hpi              | <0.0001      |
| 6 hpi vs. 8 hpi               | 0.1429       |
| 6 hpi vs. 12 hpi              | <0.0001      |
| 6 hpi vs. 18 hpi              | 0.0025       |
| 6 hpi vs. 24 hpi              | <0.0001      |
| 8 hpi vs. 12 hpi              | <0.0001      |
| 8 hpi vs. 18 hpi              | <0.0001      |
| 8 hpi vs. 24 hpi              | <0.0001      |
| 12 hpi vs. 18 hpi             | 0.9683       |
| 12 hpi vs. 24 hpi             | <0.0001      |
| 18 hpi vs. 24 hpi             | <0.0001      |
| Mock Infected                 |              |
| 1 hpi vs. 6 hpi               | 0.8805       |
| 1 hpi vs. 8 hpi               | 0.5456       |
| 1 hpi vs. 12 hpi              | 0.9998       |
| 1 hpi vs. 18 hpi              | 0.9888       |
| 1 hpi vs. 24 hpi              | 0.73         |
| 6 hpi vs. 8 hpi               | 0.0729       |
| 6 hpi vs. 12 hpi              | 0.9595       |
| 6 hpi vs. 18 hpi              | 0.5264       |
| 6 hpi vs. 24 hpi              | 0.1425       |
| 8 hpi vs. 12 hpi              | 0.3728       |
| 8 hpi vs. 18 hpi              | 0.9006       |
| 8 hpi vs. 24 hpi              | 0.9997       |
| 12 hpi vs. 18 hpi             | 0.9464       |
| 12 hpi vs. 24 hpi             | 0.5556       |
| 18 hpi vs. 24 hpi             | 0.9732       |
| No Primary Control            |              |
| 1 hpi vs. 6 hpi               | >0.9999      |
| 1 hpi vs. 8 hpi               | 0.7804       |
| 1 hpi vs. 12 hpi              | 0.9968       |
| 1 hpi vs. 18 hpi              | 0.9775       |
| 1 hpi vs. 24 hpi              | 0.9994       |
| 6 hpi vs. 8 hpi               | 0.8348       |
| 6 hpi vs. 12 hpi              | 0.992        |
| 6 hpi vs. 18 hpi              | 0.9888       |
| 6 hpi vs. 24 hpi              | 0.9977       |
| 8 hpi vs. 12 hpi              | 0.4768       |
| 8 hpi vs. 18 hpi              | 0.9923       |
| 8 hpi vs. 24 hpi              | 0.5654       |
| 12 hpi vs. 18 hpi             | 0.8295       |
| 12 hpi vs. 24 hpi             | >0.9999      |
| 18 hpi vs. 24 hpi             | 0.8892       |
| <b>Figure S3C</b>             |              |
| <b>Graph Title</b>            | F vs Pan RSV |
| <b>Comparison</b>             | P Value      |
| Slope of F vs slope of PanRSV | 0.0694       |

| <b>Figure S4B</b>  |                       |
|--------------------|-----------------------|
| <b>Graph Title</b> | F-L PLA (# of Puncta) |
| <b>Comparison</b>  | P Value               |

|                                     |                                 |
|-------------------------------------|---------------------------------|
| 1 hpi                               |                                 |
| F-L vs. No Primary Control          | <0.0001                         |
| F-L vs. Mock Control                | <0.0001                         |
| No Primary Control vs. Mock Control | 0.0452                          |
| 6 hpi                               |                                 |
| F-L vs. No Primary Control          | 0.3583                          |
| F-L vs. Mock Control                | 0.1781                          |
| No Primary Control vs. Mock Control | 0.0052                          |
| 8 hpi                               |                                 |
| F-L vs. No Primary Control          | 0.6898                          |
| F-L vs. Mock Control                | 0.001                           |
| No Primary Control vs. Mock Control | <0.0001                         |
|                                     |                                 |
| <b>Graph Title</b>                  | <b>F-L PLA (Normalized PLA)</b> |
| <b>Comparison</b>                   | <b>P Value</b>                  |
| 1 hpi F-L- No Primary Control       | <0.0001                         |
| 6 F-L- No Primary Control           | 0.9634                          |
| 8 F-L- No Primary Control           | >0.9999                         |

| <b>Figure S6C</b>                                  |                                       |
|----------------------------------------------------|---------------------------------------|
| <b>Graph Title</b>                                 | <b>RSV genome-L PLA (# of Puncta)</b> |
| <b>Comparison</b>                                  | <b>P Value</b>                        |
| 6 hpi :RSV genome-L vs. 6 hpi :No Primary Control  | 0.0018                                |
| 6 hpi :RSV genome-L vs. 6 hpi :No V5 Control       | 0.0023                                |
| 6 hpi :RSV genome-L vs. 6 hpi :Scrambled Control   | 0.0059                                |
| 6 hpi :RSV genome-L vs. 6 hpi :Biotin Control      | 0.0143                                |
| 6 hpi :RSV genome-L vs. 6 hpi :No FISH Control     | <0.0001                               |
| 6 hpi :RSV genome-L vs. 6 hpi :Mock Control        | 0.0189                                |
| 6 hpi :RSV genome-L vs. 8 hpi :RSV genome-L        | >0.9999                               |
| 6 hpi :RSV genome-L vs. 8 hpi :No Primary Control  | 0.0017                                |
| 6 hpi :RSV genome-L vs. 8 hpi :No V5 Control       | 0.0059                                |
| 6 hpi :RSV genome-L vs. 8 hpi :Scrambled Control   | 0.0004                                |
| 6 hpi :RSV genome-L vs. 8 hpi :Biotin Control      | 0.0322                                |
| 6 hpi :RSV genome-L vs. 8 hpi :No FISH Control     | 0.0032                                |
| 6 hpi :RSV genome-L vs. 8 hpi :Mock Control        | 0.0004                                |
| 6 hpi :RSV genome-L vs. 12 hpi :RSV genome-L       | <0.0001                               |
| 6 hpi :RSV genome-L vs. 12 hpi :No Primary Control | 0.0032                                |
| 6 hpi :RSV genome-L vs. 12 hpi :No V5 Control      | 0.3795                                |
| 6 hpi :RSV genome-L vs. 12 hpi :Scrambled Control  | >0.9999                               |
| 6 hpi :RSV genome-L vs. 12 hpi :Biotin Control     | >0.9999                               |
| 6 hpi :RSV genome-L vs. 12 hpi :No FISH Control    | >0.9999                               |
| 6 hpi :RSV genome-L vs. 12 hpi :Mock Control       | >0.9999                               |
| 6 hpi :RSV genome-L vs. 18 hpi:RSV genome-L        | 0.3267                                |
| 6 hpi :RSV genome-L vs. 18 hpi:No Primary Control  | 0.0017                                |
| 6 hpi :RSV genome-L vs. 18 hpi:No V5 Control       | 0.0059                                |
| 6 hpi :RSV genome-L vs. 18 hpi:Scrambled Control   | >0.9999                               |
| 6 hpi :RSV genome-L vs. 18 hpi:Biotin Control      | >0.9999                               |
| 6 hpi :RSV genome-L vs. 18 hpi:No FISH Control     | 0.008                                 |
| 6 hpi :RSV genome-L vs. 18 hpi:Mock Control        | 0.0851                                |
| 6 hpi :RSV genome-L vs. 24 hpi :RSV genome-L       | <0.0001                               |
| 6 hpi :RSV genome-L vs. 24 hpi :No Primary Control | 0.0059                                |
| 6 hpi :RSV genome-L vs. 24 hpi :No V5 Control      | 0.7312                                |
| 6 hpi :RSV genome-L vs. 24 hpi :Scrambled Control  | >0.9999                               |
| 6 hpi :RSV genome-L vs. 24 hpi :Biotin Control     | >0.9999                               |

|                                                          |         |
|----------------------------------------------------------|---------|
| 6 hpi :RSV genome-L vs. 24 hpi :No FISH Control          | 0.1062  |
| 6 hpi :RSV genome-L vs. 24 hpi :Mock Control             | 0.1062  |
| 6 hpi :No Primary Control vs. 6 hpi :No V5 Control       | >0.9999 |
| 6 hpi :No Primary Control vs. 6 hpi :Scrambled Control   | >0.9999 |
| 6 hpi :No Primary Control vs. 6 hpi :Biotin Control      | >0.9999 |
| 6 hpi :No Primary Control vs. 6 hpi :No FISH Control     | >0.9999 |
| 6 hpi :No Primary Control vs. 6 hpi :Mock Control        | >0.9999 |
| 6 hpi :No Primary Control vs. 8 hpi :RSV genome-L        | 0.0047  |
| 6 hpi :No Primary Control vs. 8 hpi :No Primary Control  | >0.9999 |
| 6 hpi :No Primary Control vs. 8 hpi :No V5 Control       | >0.9999 |
| 6 hpi :No Primary Control vs. 8 hpi :Scrambled Control   | >0.9999 |
| 6 hpi :No Primary Control vs. 8 hpi :Biotin Control      | >0.9999 |
| 6 hpi :No Primary Control vs. 8 hpi :No FISH Control     | >0.9999 |
| 6 hpi :No Primary Control vs. 8 hpi :Mock Control        | >0.9999 |
| 6 hpi :No Primary Control vs. 12 hpi :RSV genome-L       | <0.0001 |
| 6 hpi :No Primary Control vs. 12 hpi :No Primary Control | >0.9999 |
| 6 hpi :No Primary Control vs. 12 hpi :No V5 Control      | 0.9998  |
| 6 hpi :No Primary Control vs. 12 hpi :Scrambled Control  | 0.0332  |
| 6 hpi :No Primary Control vs. 12 hpi :Biotin Control     | 0.0045  |
| 6 hpi :No Primary Control vs. 12 hpi :No FISH Control    | 0.0686  |
| 6 hpi :No Primary Control vs. 12 hpi :Mock Control       | 0.0063  |
| 6 hpi :No Primary Control vs. 18 hpi :RSV genome-L       | <0.0001 |
| 6 hpi :No Primary Control vs. 18 hpi :No Primary Control | >0.9999 |
| 6 hpi :No Primary Control vs. 18 hpi :No V5 Control      | >0.9999 |
| 6 hpi :No Primary Control vs. 18 hpi :Scrambled Control  | 0.2324  |
| 6 hpi :No Primary Control vs. 18 hpi :Biotin Control     | 0.3228  |
| 6 hpi :No Primary Control vs. 18 hpi :No FISH Control    | >0.9999 |
| 6 hpi :No Primary Control vs. 18 hpi :Mock Control       | >0.9999 |
| 6 hpi :No Primary Control vs. 24 hpi :RSV genome-L       | <0.0001 |
| 6 hpi :No Primary Control vs. 24 hpi :No Primary Control | >0.9999 |
| 6 hpi :No Primary Control vs. 24 hpi :No V5 Control      | 0.9863  |
| 6 hpi :No Primary Control vs. 24 hpi :Scrambled Control  | 0.3228  |
| 6 hpi :No Primary Control vs. 24 hpi :Biotin Control     | 0.0085  |
| 6 hpi :No Primary Control vs. 24 hpi :No FISH Control    | >0.9999 |
| 6 hpi :No Primary Control vs. 24 hpi :Mock Control       | >0.9999 |
| 6 hpi :No V5 Control vs. 6 hpi :Scrambled Control        | >0.9999 |
| 6 hpi :No V5 Control vs. 6 hpi :Biotin Control           | >0.9999 |
| 6 hpi :No V5 Control vs. 6 hpi :No FISH Control          | >0.9999 |
| 6 hpi :No V5 Control vs. 6 hpi :Mock Control             | >0.9999 |
| 6 hpi :No V5 Control vs. 8 hpi :RSV genome-L             | 0.0059  |
| 6 hpi :No V5 Control vs. 8 hpi :No Primary Control       | >0.9999 |
| 6 hpi :No V5 Control vs. 8 hpi :No V5 Control            | >0.9999 |
| 6 hpi :No V5 Control vs. 8 hpi :Scrambled Control        | >0.9999 |
| 6 hpi :No V5 Control vs. 8 hpi :Biotin Control           | >0.9999 |
| 6 hpi :No V5 Control vs. 8 hpi :No FISH Control          | >0.9999 |
| 6 hpi :No V5 Control vs. 8 hpi :Mock Control             | >0.9999 |
| 6 hpi :No V5 Control vs. 12 hpi :RSV genome-L            | <0.0001 |
| 6 hpi :No V5 Control vs. 12 hpi :No Primary Control      | >0.9999 |
| 6 hpi :No V5 Control vs. 12 hpi :No V5 Control           | >0.9999 |
| 6 hpi :No V5 Control vs. 12 hpi :Scrambled Control       | 0.0416  |
| 6 hpi :No V5 Control vs. 12 hpi :Biotin Control          | 0.0056  |
| 6 hpi :No V5 Control vs. 12 hpi :No FISH Control         | 0.0851  |
| 6 hpi :No V5 Control vs. 12 hpi :Mock Control            | 0.008   |
| 6 hpi :No V5 Control vs. 18 hpi :RSV genome-L            | <0.0001 |

|                                                         |         |
|---------------------------------------------------------|---------|
| 6 hpi :No V5 Control vs. 18 hpi:No Primary Control      | >0.9999 |
| 6 hpi :No V5 Control vs. 18 hpi:No V5 Control           | >0.9999 |
| 6 hpi :No V5 Control vs. 18 hpi:Scrambled Control       | 0.278   |
| 6 hpi :No V5 Control vs. 18 hpi:Biotin Control          | 0.3795  |
| 6 hpi :No V5 Control vs. 18 hpi:No FISH Control         | >0.9999 |
| 6 hpi :No V5 Control vs. 18 hpi:Mock Control            | >0.9999 |
| 6 hpi :No V5 Control vs. 24 hpi :RSV genome-L           | <0.0001 |
| 6 hpi :No V5 Control vs. 24 hpi :No Primary Control     | >0.9999 |
| 6 hpi :No V5 Control vs. 24 hpi :No V5 Control          | 0.9936  |
| 6 hpi :No V5 Control vs. 24 hpi :Scrambled Control      | 0.3795  |
| 6 hpi :No V5 Control vs. 24 hpi :Biotin Control         | 0.0107  |
| 6 hpi :No V5 Control vs. 24 hpi :No FISH Control        | >0.9999 |
| 6 hpi :No V5 Control vs. 24 hpi :Mock Control           | >0.9999 |
| 6 hpi :Scrambled Control vs. 6 hpi :Biotin Control      | >0.9999 |
| 6 hpi :Scrambled Control vs. 6 hpi :No FISH Control     | >0.9999 |
| 6 hpi :Scrambled Control vs. 6 hpi :Mock Control        | >0.9999 |
| 6 hpi :Scrambled Control vs. 8 hpi :RSV genome-L        | 0.0143  |
| 6 hpi :Scrambled Control vs. 8 hpi :No Primary Control  | >0.9999 |
| 6 hpi :Scrambled Control vs. 8 hpi :No V5 Control       | >0.9999 |
| 6 hpi :Scrambled Control vs. 8 hpi :Scrambled Control   | >0.9999 |
| 6 hpi :Scrambled Control vs. 8 hpi :Biotin Control      | >0.9999 |
| 6 hpi :Scrambled Control vs. 8 hpi :No FISH Control     | >0.9999 |
| 6 hpi :Scrambled Control vs. 8 hpi :Mock Control        | >0.9999 |
| 6 hpi :Scrambled Control vs. 12 hpi :RSV genome-L       | <0.0001 |
| 6 hpi :Scrambled Control vs. 12 hpi :No Primary Control | >0.9999 |
| 6 hpi :Scrambled Control vs. 12 hpi :No V5 Control      | >0.9999 |
| 6 hpi :Scrambled Control vs. 12 hpi :Scrambled Control  | 0.0851  |
| 6 hpi :Scrambled Control vs. 12 hpi :Biotin Control     | 0.0135  |
| 6 hpi :Scrambled Control vs. 12 hpi :No FISH Control    | 0.1609  |
| 6 hpi :Scrambled Control vs. 12 hpi :Mock Control       | 0.0189  |
| 6 hpi :Scrambled Control vs. 18 hpi:RSV genome-L        | <0.0001 |
| 6 hpi :Scrambled Control vs. 18 hpi:No Primary Control  | >0.9999 |
| 6 hpi :Scrambled Control vs. 18 hpi:No V5 Control       | >0.9999 |
| 6 hpi :Scrambled Control vs. 18 hpi:Scrambled Control   | 0.4359  |
| 6 hpi :Scrambled Control vs. 18 hpi:Biotin Control      | 0.5554  |
| 6 hpi :Scrambled Control vs. 18 hpi:No FISH Control     | >0.9999 |
| 6 hpi :Scrambled Control vs. 18 hpi:Mock Control        | >0.9999 |
| 6 hpi :Scrambled Control vs. 24 hpi :RSV genome-L       | <0.0001 |
| 6 hpi :Scrambled Control vs. 24 hpi :No Primary Control | >0.9999 |
| 6 hpi :Scrambled Control vs. 24 hpi :No V5 Control      | 0.9992  |
| 6 hpi :Scrambled Control vs. 24 hpi :Scrambled Control  | 0.5554  |
| 6 hpi :Scrambled Control vs. 24 hpi :Biotin Control     | 0.0247  |
| 6 hpi :Scrambled Control vs. 24 hpi :No FISH Control    | >0.9999 |
| 6 hpi :Scrambled Control vs. 24 hpi :Mock Control       | >0.9999 |
| 6 hpi :Biotin Control vs. 6 hpi :No FISH Control        | 0.9997  |
| 6 hpi :Biotin Control vs. 6 hpi :Mock Control           | >0.9999 |
| 6 hpi :Biotin Control vs. 8 hpi :RSV genome-L           | 0.0322  |
| 6 hpi :Biotin Control vs. 8 hpi :No Primary Control     | >0.9999 |
| 6 hpi :Biotin Control vs. 8 hpi :No V5 Control          | >0.9999 |
| 6 hpi :Biotin Control vs. 8 hpi :Scrambled Control      | >0.9999 |
| 6 hpi :Biotin Control vs. 8 hpi :Biotin Control         | >0.9999 |
| 6 hpi :Biotin Control vs. 8 hpi :No FISH Control        | >0.9999 |
| 6 hpi :Biotin Control vs. 8 hpi :Mock Control           | >0.9999 |
| 6 hpi :Biotin Control vs. 12 hpi :RSV genome-L          | <0.0001 |



|                                                       |         |
|-------------------------------------------------------|---------|
| 6 hpi :Biotin Control vs. 12 hpi :No Primary Control  | >0.9999 |
| 6 hpi :Biotin Control vs. 12 hpi :No V5 Control       | >0.9999 |
| 6 hpi :Biotin Control vs. 12 hpi :Scrambled Control   | 0.1609  |
| 6 hpi :Biotin Control vs. 12 hpi :Biotin Control      | 0.0304  |
| 6 hpi :Biotin Control vs. 12 hpi :No FISH Control     | 0.278   |
| 6 hpi :Biotin Control vs. 12 hpi :Mock Control        | 0.0416  |
| 6 hpi :Biotin Control vs. 18 hpi:RSV genome-L         | <0.0001 |
| 6 hpi :Biotin Control vs. 18 hpi:No Primary Control   | >0.9999 |
| 6 hpi :Biotin Control vs. 18 hpi:No V5 Control        | >0.9999 |
| 6 hpi :Biotin Control vs. 18 hpi:Scrambled Control    | 0.6159  |
| 6 hpi :Biotin Control vs. 18 hpi:Biotin Control       | 0.7312  |
| 6 hpi :Biotin Control vs. 18 hpi:No FISH Control      | >0.9999 |
| 6 hpi :Biotin Control vs. 18 hpi:Mock Control         | >0.9999 |
| 6 hpi :Biotin Control vs. 24 hpi :RSV genome-L        | <0.0001 |
| 6 hpi :Biotin Control vs. 24 hpi :No Primary Control  | >0.9999 |
| 6 hpi :Biotin Control vs. 24 hpi :No V5 Control       | >0.9999 |
| 6 hpi :Biotin Control vs. 24 hpi :Scrambled Control   | 0.7312  |
| 6 hpi :Biotin Control vs. 24 hpi :Biotin Control      | 0.0532  |
| 6 hpi :Biotin Control vs. 24 hpi :No FISH Control     | >0.9999 |
| 6 hpi :Biotin Control vs. 24 hpi :Mock Control        | >0.9999 |
| 6 hpi :No FISH Control vs. 6 hpi :Mock Control        | 0.9992  |
| 6 hpi :No FISH Control vs. 8 hpi :RSV genome-L        | <0.0001 |
| 6 hpi :No FISH Control vs. 8 hpi :No Primary Control  | >0.9999 |
| 6 hpi :No FISH Control vs. 8 hpi :No V5 Control       | >0.9999 |
| 6 hpi :No FISH Control vs. 8 hpi :Scrambled Control   | >0.9999 |
| 6 hpi :No FISH Control vs. 8 hpi :Biotin Control      | 0.9966  |
| 6 hpi :No FISH Control vs. 8 hpi :No FISH Control     | >0.9999 |
| 6 hpi :No FISH Control vs. 8 hpi :Mock Control        | >0.9999 |
| 6 hpi :No FISH Control vs. 12 hpi :RSV genome-L       | <0.0001 |
| 6 hpi :No FISH Control vs. 12 hpi :No Primary Control | >0.9999 |
| 6 hpi :No FISH Control vs. 12 hpi :No V5 Control      | 0.675   |
| 6 hpi :No FISH Control vs. 12 hpi :Scrambled Control  | 0.0002  |
| 6 hpi :No FISH Control vs. 12 hpi :Biotin Control     | <0.0001 |
| 6 hpi :No FISH Control vs. 12 hpi :No FISH Control    | 0.0006  |
| 6 hpi :No FISH Control vs. 12 hpi :Mock Control       | <0.0001 |
| 6 hpi :No FISH Control vs. 18 hpi:RSV genome-L        | <0.0001 |
| 6 hpi :No FISH Control vs. 18 hpi:No Primary Control  | >0.9999 |
| 6 hpi :No FISH Control vs. 18 hpi:No V5 Control       | >0.9999 |
| 6 hpi :No FISH Control vs. 18 hpi:Scrambled Control   | 0.0044  |
| 6 hpi :No FISH Control vs. 18 hpi:Biotin Control      | 0.008   |
| 6 hpi :No FISH Control vs. 18 hpi:No FISH Control     | >0.9999 |
| 6 hpi :No FISH Control vs. 18 hpi:Mock Control        | 0.9696  |
| 6 hpi :No FISH Control vs. 24 hpi :RSV genome-L       | <0.0001 |
| 6 hpi :No FISH Control vs. 24 hpi :No Primary Control | >0.9999 |
| 6 hpi :No FISH Control vs. 24 hpi :No V5 Control      | 0.3267  |
| 6 hpi :No FISH Control vs. 24 hpi :Scrambled Control  | 0.008   |
| 6 hpi :No FISH Control vs. 24 hpi :Biotin Control     | <0.0001 |
| 6 hpi :No FISH Control vs. 24 hpi :No FISH Control    | 0.9536  |
| 6 hpi :No FISH Control vs. 24 hpi :Mock Control       | 0.9536  |
| 6 hpi :Mock Control vs. 8 hpi :RSV genome-L           | 0.0416  |
| 6 hpi :Mock Control vs. 8 hpi :No Primary Control     | >0.9999 |
| 6 hpi :Mock Control vs. 8 hpi :No V5 Control          | >0.9999 |
| 6 hpi :Mock Control vs. 8 hpi :Scrambled Control      | >0.9999 |
| 6 hpi :Mock Control vs. 8 hpi :Biotin Control         | >0.9999 |

|                                                        |         |
|--------------------------------------------------------|---------|
| 6 hpi :Mock Control vs. 8 hpi :No FISH Control         | >0.9999 |
| 6 hpi :Mock Control vs. 8 hpi :Mock Control            | >0.9999 |
| 6 hpi :Mock Control vs. 12 hpi :RSV genome-L           | <0.0001 |
| 6 hpi :Mock Control vs. 12 hpi :No Primary Control     | >0.9999 |
| 6 hpi :Mock Control vs. 12 hpi :No V5 Control          | >0.9999 |
| 6 hpi :Mock Control vs. 12 hpi :Scrambled Control      | 0.1951  |
| 6 hpi :Mock Control vs. 12 hpi :Biotin Control         | 0.0393  |
| 6 hpi :Mock Control vs. 12 hpi :No FISH Control        | 0.3267  |
| 6 hpi :Mock Control vs. 12 hpi :Mock Control           | 0.0532  |
| 6 hpi :Mock Control vs. 18 hpi:RSV genome-L            | <0.0001 |
| 6 hpi :Mock Control vs. 18 hpi:No Primary Control      | >0.9999 |
| 6 hpi :Mock Control vs. 18 hpi:No V5 Control           | >0.9999 |
| 6 hpi :Mock Control vs. 18 hpi:Scrambled Control       | 0.675   |
| 6 hpi :Mock Control vs. 18 hpi:Biotin Control          | 0.7832  |
| 6 hpi :Mock Control vs. 18 hpi:No FISH Control         | >0.9999 |
| 6 hpi :Mock Control vs. 18 hpi:Mock Control            | >0.9999 |
| 6 hpi :Mock Control vs. 24 hpi :RSV genome-L           | <0.0001 |
| 6 hpi :Mock Control vs. 24 hpi :No Primary Control     | >0.9999 |
| 6 hpi :Mock Control vs. 24 hpi :No V5 Control          | >0.9999 |
| 6 hpi :Mock Control vs. 24 hpi :Scrambled Control      | 0.7832  |
| 6 hpi :Mock Control vs. 24 hpi :Biotin Control         | 0.0676  |
| 6 hpi :Mock Control vs. 24 hpi :No FISH Control        | >0.9999 |
| 6 hpi :Mock Control vs. 24 hpi :Mock Control           | >0.9999 |
| 8 hpi :RSV genome-L vs. 8 hpi :No Primary Control      | 0.0044  |
| 8 hpi :RSV genome-L vs. 8 hpi :No V5 Control           | 0.0143  |
| 8 hpi :RSV genome-L vs. 8 hpi :Scrambled Control       | 0.0012  |
| 8 hpi :RSV genome-L vs. 8 hpi :Biotin Control          | 0.0676  |
| 8 hpi :RSV genome-L vs. 8 hpi :No FISH Control         | 0.008   |
| 8 hpi :RSV genome-L vs. 8 hpi :Mock Control            | 0.0012  |
| 8 hpi :RSV genome-L vs. 12 hpi :RSV genome-L           | <0.0001 |
| 8 hpi :RSV genome-L vs. 12 hpi :No Primary Control     | 0.008   |
| 8 hpi :RSV genome-L vs. 12 hpi :No V5 Control          | 0.5554  |
| 8 hpi :RSV genome-L vs. 12 hpi :Scrambled Control      | >0.9999 |
| 8 hpi :RSV genome-L vs. 12 hpi :Biotin Control         | >0.9999 |
| 8 hpi :RSV genome-L vs. 12 hpi :No FISH Control        | >0.9999 |
| 8 hpi :RSV genome-L vs. 12 hpi :Mock Control           | >0.9999 |
| 8 hpi :RSV genome-L vs. 18 hpi:RSV genome-L            | 0.1951  |
| 8 hpi :RSV genome-L vs. 18 hpi:No Primary Control      | 0.0044  |
| 8 hpi :RSV genome-L vs. 18 hpi:No V5 Control           | 0.0143  |
| 8 hpi :RSV genome-L vs. 18 hpi:Scrambled Control       | >0.9999 |
| 8 hpi :RSV genome-L vs. 18 hpi:Biotin Control          | >0.9999 |
| 8 hpi :RSV genome-L vs. 18 hpi:No FISH Control         | 0.0189  |
| 8 hpi :RSV genome-L vs. 18 hpi:Mock Control            | 0.1609  |
| 8 hpi :RSV genome-L vs. 24 hpi :RSV genome-L           | <0.0001 |
| 8 hpi :RSV genome-L vs. 24 hpi :No Primary Control     | 0.0143  |
| 8 hpi :RSV genome-L vs. 24 hpi :No V5 Control          | 0.8705  |
| 8 hpi :RSV genome-L vs. 24 hpi :Scrambled Control      | >0.9999 |
| 8 hpi :RSV genome-L vs. 24 hpi :Biotin Control         | >0.9999 |
| 8 hpi :RSV genome-L vs. 24 hpi :No FISH Control        | 0.1951  |
| 8 hpi :RSV genome-L vs. 24 hpi :Mock Control           | 0.1951  |
| 8 hpi :No Primary Control vs. 8 hpi :No V5 Control     | >0.9999 |
| 8 hpi :No Primary Control vs. 8 hpi :Scrambled Control | >0.9999 |
| 8 hpi :No Primary Control vs. 8 hpi :Biotin Control    | >0.9999 |
| 8 hpi :No Primary Control vs. 8 hpi :No FISH Control   | >0.9999 |

|                                                          |         |
|----------------------------------------------------------|---------|
| 8 hpi :No Primary Control vs. 8 hpi :Mock Control        | >0.9999 |
| 8 hpi :No Primary Control vs. 12 hpi :RSV genome-L       | <0.0001 |
| 8 hpi :No Primary Control vs. 12 hpi :No Primary Control | >0.9999 |
| 8 hpi :No Primary Control vs. 12 hpi :No V5 Control      | 0.9999  |
| 8 hpi :No Primary Control vs. 12 hpi :Scrambled Control  | 0.0322  |
| 8 hpi :No Primary Control vs. 12 hpi :Biotin Control     | 0.0042  |
| 8 hpi :No Primary Control vs. 12 hpi :No FISH Control    | 0.0676  |
| 8 hpi :No Primary Control vs. 12 hpi :Mock Control       | 0.0059  |
| 8 hpi :No Primary Control vs. 18 hpi:RSV genome-L        | <0.0001 |
| 8 hpi :No Primary Control vs. 18 hpi:No Primary Control  | >0.9999 |
| 8 hpi :No Primary Control vs. 18 hpi:No V5 Control       | >0.9999 |
| 8 hpi :No Primary Control vs. 18 hpi:Scrambled Control   | 0.2341  |
| 8 hpi :No Primary Control vs. 18 hpi:Biotin Control      | 0.3267  |
| 8 hpi :No Primary Control vs. 18 hpi:No FISH Control     | >0.9999 |
| 8 hpi :No Primary Control vs. 18 hpi:Mock Control        | >0.9999 |
| 8 hpi :No Primary Control vs. 24 hpi :RSV genome-L       | <0.0001 |
| 8 hpi :No Primary Control vs. 24 hpi :No Primary Control | >0.9999 |
| 8 hpi :No Primary Control vs. 24 hpi :No V5 Control      | 0.9886  |
| 8 hpi :No Primary Control vs. 24 hpi :Scrambled Control  | 0.3267  |
| 8 hpi :No Primary Control vs. 24 hpi :Biotin Control     | 0.008   |
| 8 hpi :No Primary Control vs. 24 hpi :No FISH Control    | >0.9999 |
| 8 hpi :No Primary Control vs. 24 hpi :Mock Control       | >0.9999 |
| 8 hpi :No V5 Control vs. 8 hpi :Scrambled Control        | >0.9999 |
| 8 hpi :No V5 Control vs. 8 hpi :Biotin Control           | >0.9999 |
| 8 hpi :No V5 Control vs. 8 hpi :No FISH Control          | >0.9999 |
| 8 hpi :No V5 Control vs. 8 hpi :Mock Control             | >0.9999 |
| 8 hpi :No V5 Control vs. 12 hpi :RSV genome-L            | <0.0001 |
| 8 hpi :No V5 Control vs. 12 hpi :No Primary Control      | >0.9999 |
| 8 hpi :No V5 Control vs. 12 hpi :No V5 Control           | >0.9999 |
| 8 hpi :No V5 Control vs. 12 hpi :Scrambled Control       | 0.0851  |
| 8 hpi :No V5 Control vs. 12 hpi :Biotin Control          | 0.0135  |
| 8 hpi :No V5 Control vs. 12 hpi :No FISH Control         | 0.1609  |
| 8 hpi :No V5 Control vs. 12 hpi :Mock Control            | 0.0189  |
| 8 hpi :No V5 Control vs. 18 hpi:RSV genome-L             | <0.0001 |
| 8 hpi :No V5 Control vs. 18 hpi:No Primary Control       | >0.9999 |
| 8 hpi :No V5 Control vs. 18 hpi:No V5 Control            | >0.9999 |
| 8 hpi :No V5 Control vs. 18 hpi:Scrambled Control        | 0.4359  |
| 8 hpi :No V5 Control vs. 18 hpi:Biotin Control           | 0.5554  |
| 8 hpi :No V5 Control vs. 18 hpi:No FISH Control          | >0.9999 |
| 8 hpi :No V5 Control vs. 18 hpi:Mock Control             | >0.9999 |
| 8 hpi :No V5 Control vs. 24 hpi :RSV genome-L            | <0.0001 |
| 8 hpi :No V5 Control vs. 24 hpi :No Primary Control      | >0.9999 |
| 8 hpi :No V5 Control vs. 24 hpi :No V5 Control           | 0.9992  |
| 8 hpi :No V5 Control vs. 24 hpi :Scrambled Control       | 0.5554  |
| 8 hpi :No V5 Control vs. 24 hpi :Biotin Control          | 0.0247  |
| 8 hpi :No V5 Control vs. 24 hpi :No FISH Control         | >0.9999 |
| 8 hpi :No V5 Control vs. 24 hpi :Mock Control            | >0.9999 |
| 8 hpi :Scrambled Control vs. 8 hpi :Biotin Control       | >0.9999 |
| 8 hpi :Scrambled Control vs. 8 hpi :No FISH Control      | >0.9999 |
| 8 hpi :Scrambled Control vs. 8 hpi :Mock Control         | >0.9999 |
| 8 hpi :Scrambled Control vs. 12 hpi :RSV genome-L        | <0.0001 |
| 8 hpi :Scrambled Control vs. 12 hpi :No Primary Control  | >0.9999 |
| 8 hpi :Scrambled Control vs. 12 hpi :No V5 Control       | 0.9966  |
| 8 hpi :Scrambled Control vs. 12 hpi :Scrambled Control   | 0.0107  |

|                                                         |         |
|---------------------------------------------------------|---------|
| 8 hpi :Scrambled Control vs. 12 hpi :Biotin Control     | 0.0012  |
| 8 hpi :Scrambled Control vs. 12 hpi :No FISH Control    | 0.0247  |
| 8 hpi :Scrambled Control vs. 12 hpi :Mock Control       | 0.0017  |
| 8 hpi :Scrambled Control vs. 18 hpi:RSV genome-L        | <0.0001 |
| 8 hpi :Scrambled Control vs. 18 hpi:No Primary Control  | >0.9999 |
| 8 hpi :Scrambled Control vs. 18 hpi:No V5 Control       | >0.9999 |
| 8 hpi :Scrambled Control vs. 18 hpi:Scrambled Control   | 0.1062  |
| 8 hpi :Scrambled Control vs. 18 hpi:Biotin Control      | 0.1609  |
| 8 hpi :Scrambled Control vs. 18 hpi:No FISH Control     | >0.9999 |
| 8 hpi :Scrambled Control vs. 18 hpi:Mock Control        | >0.9999 |
| 8 hpi :Scrambled Control vs. 24 hpi :RSV genome-L       | <0.0001 |
| 8 hpi :Scrambled Control vs. 24 hpi :No Primary Control | >0.9999 |
| 8 hpi :Scrambled Control vs. 24 hpi :No V5 Control      | 0.9322  |
| 8 hpi :Scrambled Control vs. 24 hpi :Scrambled Control  | 0.1609  |
| 8 hpi :Scrambled Control vs. 24 hpi :Biotin Control     | 0.0023  |
| 8 hpi :Scrambled Control vs. 24 hpi :No FISH Control    | >0.9999 |
| 8 hpi :Scrambled Control vs. 24 hpi :Mock Control       | >0.9999 |
| 8 hpi :Biotin Control vs. 8 hpi :No FISH Control        | >0.9999 |
| 8 hpi :Biotin Control vs. 8 hpi :Mock Control           | >0.9999 |
| 8 hpi :Biotin Control vs. 12 hpi :RSV genome-L          | <0.0001 |
| 8 hpi :Biotin Control vs. 12 hpi :No Primary Control    | >0.9999 |
| 8 hpi :Biotin Control vs. 12 hpi :No V5 Control         | >0.9999 |
| 8 hpi :Biotin Control vs. 12 hpi :Scrambled Control     | 0.278   |
| 8 hpi :Biotin Control vs. 12 hpi :Biotin Control        | 0.0639  |
| 8 hpi :Biotin Control vs. 12 hpi :No FISH Control       | 0.4359  |
| 8 hpi :Biotin Control vs. 12 hpi :Mock Control          | 0.0851  |
| 8 hpi :Biotin Control vs. 18 hpi:RSV genome-L           | <0.0001 |
| 8 hpi :Biotin Control vs. 18 hpi:No Primary Control     | >0.9999 |
| 8 hpi :Biotin Control vs. 18 hpi:No V5 Control          | >0.9999 |
| 8 hpi :Biotin Control vs. 18 hpi:Scrambled Control      | 0.7832  |
| 8 hpi :Biotin Control vs. 18 hpi:Biotin Control         | 0.8705  |
| 8 hpi :Biotin Control vs. 18 hpi:No FISH Control        | >0.9999 |
| 8 hpi :Biotin Control vs. 18 hpi:Mock Control           | >0.9999 |
| 8 hpi :Biotin Control vs. 24 hpi :RSV genome-L          | <0.0001 |
| 8 hpi :Biotin Control vs. 24 hpi :No Primary Control    | >0.9999 |
| 8 hpi :Biotin Control vs. 24 hpi :No V5 Control         | >0.9999 |
| 8 hpi :Biotin Control vs. 24 hpi :Scrambled Control     | 0.8705  |
| 8 hpi :Biotin Control vs. 24 hpi :Biotin Control        | 0.1062  |
| 8 hpi :Biotin Control vs. 24 hpi :No FISH Control       | >0.9999 |
| 8 hpi :Biotin Control vs. 24 hpi :Mock Control          | >0.9999 |
| 8 hpi :No FISH Control vs. 8 hpi :Mock Control          | >0.9999 |
| 8 hpi :No FISH Control vs. 12 hpi :RSV genome-L         | <0.0001 |
| 8 hpi :No FISH Control vs. 12 hpi :No Primary Control   | >0.9999 |
| 8 hpi :No FISH Control vs. 12 hpi :No V5 Control        | >0.9999 |
| 8 hpi :No FISH Control vs. 12 hpi :Scrambled Control    | 0.0532  |
| 8 hpi :No FISH Control vs. 12 hpi :Biotin Control       | 0.0076  |
| 8 hpi :No FISH Control vs. 12 hpi :No FISH Control      | 0.1062  |
| 8 hpi :No FISH Control vs. 12 hpi :Mock Control         | 0.0107  |
| 8 hpi :No FISH Control vs. 18 hpi:RSV genome-L          | <0.0001 |
| 8 hpi :No FISH Control vs. 18 hpi:No Primary Control    | >0.9999 |
| 8 hpi :No FISH Control vs. 18 hpi:No V5 Control         | >0.9999 |
| 8 hpi :No FISH Control vs. 18 hpi:Scrambled Control     | 0.3267  |
| 8 hpi :No FISH Control vs. 18 hpi:Biotin Control        | 0.4359  |
| 8 hpi :No FISH Control vs. 18 hpi:No FISH Control       | >0.9999 |

|                                                          |         |
|----------------------------------------------------------|---------|
| 8 hpi :No FISH Control vs. 18 hpi:Mock Control           | >0.9999 |
| 8 hpi :No FISH Control vs. 24 hpi :RSV genome-L          | <0.0001 |
| 8 hpi :No FISH Control vs. 24 hpi :No Primary Control    | >0.9999 |
| 8 hpi :No FISH Control vs. 24 hpi :No V5 Control         | 0.9966  |
| 8 hpi :No FISH Control vs. 24 hpi :Scrambled Control     | 0.4359  |
| 8 hpi :No FISH Control vs. 24 hpi :Biotin Control        | 0.0143  |
| 8 hpi :No FISH Control vs. 24 hpi :No FISH Control       | >0.9999 |
| 8 hpi :No FISH Control vs. 24 hpi :Mock Control          | >0.9999 |
| 8 hpi :Mock Control vs. 12 hpi :RSV genome-L             | <0.0001 |
| 8 hpi :Mock Control vs. 12 hpi :No Primary Control       | >0.9999 |
| 8 hpi :Mock Control vs. 12 hpi :No V5 Control            | 0.9966  |
| 8 hpi :Mock Control vs. 12 hpi :Scrambled Control        | 0.0107  |
| 8 hpi :Mock Control vs. 12 hpi :Biotin Control           | 0.0012  |
| 8 hpi :Mock Control vs. 12 hpi :No FISH Control          | 0.0247  |
| 8 hpi :Mock Control vs. 12 hpi :Mock Control             | 0.0017  |
| 8 hpi :Mock Control vs. 18 hpi:RSV genome-L              | <0.0001 |
| 8 hpi :Mock Control vs. 18 hpi:No Primary Control        | >0.9999 |
| 8 hpi :Mock Control vs. 18 hpi:No V5 Control             | >0.9999 |
| 8 hpi :Mock Control vs. 18 hpi:Scrambled Control         | 0.1062  |
| 8 hpi :Mock Control vs. 18 hpi:Biotin Control            | 0.1609  |
| 8 hpi :Mock Control vs. 18 hpi:No FISH Control           | >0.9999 |
| 8 hpi :Mock Control vs. 18 hpi:Mock Control              | >0.9999 |
| 8 hpi :Mock Control vs. 24 hpi :RSV genome-L             | <0.0001 |
| 8 hpi :Mock Control vs. 24 hpi :No Primary Control       | >0.9999 |
| 8 hpi :Mock Control vs. 24 hpi :No V5 Control            | 0.9322  |
| 8 hpi :Mock Control vs. 24 hpi :Scrambled Control        | 0.1609  |
| 8 hpi :Mock Control vs. 24 hpi :Biotin Control           | 0.0023  |
| 8 hpi :Mock Control vs. 24 hpi :No FISH Control          | >0.9999 |
| 8 hpi :Mock Control vs. 24 hpi :Mock Control             | >0.9999 |
| 12 hpi :RSV genome-L vs. 12 hpi :No Primary Control      | <0.0001 |
| 12 hpi :RSV genome-L vs. 12 hpi :No V5 Control           | <0.0001 |
| 12 hpi :RSV genome-L vs. 12 hpi :Scrambled Control       | <0.0001 |
| 12 hpi :RSV genome-L vs. 12 hpi :Biotin Control          | <0.0001 |
| 12 hpi :RSV genome-L vs. 12 hpi :No FISH Control         | <0.0001 |
| 12 hpi :RSV genome-L vs. 12 hpi :Mock Control            | <0.0001 |
| 12 hpi :RSV genome-L vs. 18 hpi:RSV genome-L             | <0.0001 |
| 12 hpi :RSV genome-L vs. 18 hpi:No Primary Control       | <0.0001 |
| 12 hpi :RSV genome-L vs. 18 hpi:No V5 Control            | <0.0001 |
| 12 hpi :RSV genome-L vs. 18 hpi:Scrambled Control        | <0.0001 |
| 12 hpi :RSV genome-L vs. 18 hpi:Biotin Control           | <0.0001 |
| 12 hpi :RSV genome-L vs. 18 hpi:No FISH Control          | <0.0001 |
| 12 hpi :RSV genome-L vs. 18 hpi:Mock Control             | <0.0001 |
| 12 hpi :RSV genome-L vs. 24 hpi :RSV genome-L            | <0.0001 |
| 12 hpi :RSV genome-L vs. 24 hpi :No Primary Control      | <0.0001 |
| 12 hpi :RSV genome-L vs. 24 hpi :No V5 Control           | <0.0001 |
| 12 hpi :RSV genome-L vs. 24 hpi :Scrambled Control       | <0.0001 |
| 12 hpi :RSV genome-L vs. 24 hpi :Biotin Control          | <0.0001 |
| 12 hpi :RSV genome-L vs. 24 hpi :No FISH Control         | <0.0001 |
| 12 hpi :RSV genome-L vs. 24 hpi :Mock Control            | <0.0001 |
| 12 hpi :No Primary Control vs. 12 hpi :No V5 Control     | >0.9999 |
| 12 hpi :No Primary Control vs. 12 hpi :Scrambled Control | 0.0532  |
| 12 hpi :No Primary Control vs. 12 hpi :Biotin Control    | 0.0076  |
| 12 hpi :No Primary Control vs. 12 hpi :No FISH Control   | 0.1062  |
| 12 hpi :No Primary Control vs. 12 hpi :Mock Control      | 0.0107  |

|                                                           |         |
|-----------------------------------------------------------|---------|
| 12 hpi :No Primary Control vs. 18 hpi:RSV genome-L        | <0.0001 |
| 12 hpi :No Primary Control vs. 18 hpi:No Primary Control  | >0.9999 |
| 12 hpi :No Primary Control vs. 18 hpi:No V5 Control       | >0.9999 |
| 12 hpi :No Primary Control vs. 18 hpi:Scrambled Control   | 0.3267  |
| 12 hpi :No Primary Control vs. 18 hpi:Biotin Control      | 0.4359  |
| 12 hpi :No Primary Control vs. 18 hpi:No FISH Control     | >0.9999 |
| 12 hpi :No Primary Control vs. 18 hpi:Mock Control        | >0.9999 |
| 12 hpi :No Primary Control vs. 24 hpi :RSV genome-L       | <0.0001 |
| 12 hpi :No Primary Control vs. 24 hpi :No Primary Control | >0.9999 |
| 12 hpi :No Primary Control vs. 24 hpi :No V5 Control      | 0.9966  |
| 12 hpi :No Primary Control vs. 24 hpi :Scrambled Control  | 0.4359  |
| 12 hpi :No Primary Control vs. 24 hpi :Biotin Control     | 0.0143  |
| 12 hpi :No Primary Control vs. 24 hpi :No FISH Control    | >0.9999 |
| 12 hpi :No Primary Control vs. 24 hpi :Mock Control       | >0.9999 |
| 12 hpi :No V5 Control vs. 12 hpi :Scrambled Control       | 0.9046  |
| 12 hpi :No V5 Control vs. 12 hpi :Biotin Control          | 0.5346  |
| 12 hpi :No V5 Control vs. 12 hpi :No FISH Control         | 0.9696  |
| 12 hpi :No V5 Control vs. 12 hpi :Mock Control            | 0.6159  |
| 12 hpi :No V5 Control vs. 18 hpi:RSV genome-L             | <0.0001 |
| 12 hpi :No V5 Control vs. 18 hpi:No Primary Control       | 0.9999  |
| 12 hpi :No V5 Control vs. 18 hpi:No V5 Control            | >0.9999 |
| 12 hpi :No V5 Control vs. 18 hpi:Scrambled Control        | 0.9992  |
| 12 hpi :No V5 Control vs. 18 hpi:Biotin Control           | 0.9999  |
| 12 hpi :No V5 Control vs. 18 hpi:No FISH Control          | >0.9999 |
| 12 hpi :No V5 Control vs. 18 hpi:Mock Control             | >0.9999 |
| 12 hpi :No V5 Control vs. 24 hpi :RSV genome-L            | <0.0001 |
| 12 hpi :No V5 Control vs. 24 hpi :No Primary Control      | >0.9999 |
| 12 hpi :No V5 Control vs. 24 hpi :No V5 Control           | >0.9999 |
| 12 hpi :No V5 Control vs. 24 hpi :Scrambled Control       | 0.9999  |
| 12 hpi :No V5 Control vs. 24 hpi :Biotin Control          | 0.675   |
| 12 hpi :No V5 Control vs. 24 hpi :No FISH Control         | >0.9999 |
| 12 hpi :No V5 Control vs. 24 hpi :Mock Control            | >0.9999 |
| 12 hpi :Scrambled Control vs. 12 hpi :Biotin Control      | >0.9999 |
| 12 hpi :Scrambled Control vs. 12 hpi :No FISH Control     | >0.9999 |
| 12 hpi :Scrambled Control vs. 12 hpi :Mock Control        | >0.9999 |
| 12 hpi :Scrambled Control vs. 18 hpi:RSV genome-L         | 0.0416  |
| 12 hpi :Scrambled Control vs. 18 hpi:No Primary Control   | 0.0322  |
| 12 hpi :Scrambled Control vs. 18 hpi:No V5 Control        | 0.0851  |
| 12 hpi :Scrambled Control vs. 18 hpi:Scrambled Control    | >0.9999 |
| 12 hpi :Scrambled Control vs. 18 hpi:Biotin Control       | >0.9999 |
| 12 hpi :Scrambled Control vs. 18 hpi:No FISH Control      | 0.1062  |
| 12 hpi :Scrambled Control vs. 18 hpi:Mock Control         | 0.4949  |
| 12 hpi :Scrambled Control vs. 24 hpi :RSV genome-L        | <0.0001 |
| 12 hpi :Scrambled Control vs. 24 hpi :No Primary Control  | 0.0851  |
| 12 hpi :Scrambled Control vs. 24 hpi :No V5 Control       | 0.9936  |
| 12 hpi :Scrambled Control vs. 24 hpi :Scrambled Control   | >0.9999 |
| 12 hpi :Scrambled Control vs. 24 hpi :Biotin Control      | >0.9999 |
| 12 hpi :Scrambled Control vs. 24 hpi :No FISH Control     | 0.5554  |
| 12 hpi :Scrambled Control vs. 24 hpi :Mock Control        | 0.5554  |
| 12 hpi :Biotin Control vs. 12 hpi :No FISH Control        | >0.9999 |
| 12 hpi :Biotin Control vs. 12 hpi :Mock Control           | >0.9999 |
| 12 hpi :Biotin Control vs. 18 hpi:RSV genome-L            | 0.2376  |
| 12 hpi :Biotin Control vs. 18 hpi:No Primary Control      | 0.0042  |
| 12 hpi :Biotin Control vs. 18 hpi:No V5 Control           | 0.0135  |

|                                                        |         |
|--------------------------------------------------------|---------|
| 12 hpi :Biotin Control vs. 18 hpi:Scrambled Control    | >0.9999 |
| 12 hpi :Biotin Control vs. 18 hpi:Biotin Control       | >0.9999 |
| 12 hpi :Biotin Control vs. 18 hpi:No FISH Control      | 0.0179  |
| 12 hpi :Biotin Control vs. 18 hpi:Mock Control         | 0.1523  |
| 12 hpi :Biotin Control vs. 24 hpi :RSV genome-L        | <0.0001 |
| 12 hpi :Biotin Control vs. 24 hpi :No Primary Control  | 0.0135  |
| 12 hpi :Biotin Control vs. 24 hpi :No V5 Control       | 0.8553  |
| 12 hpi :Biotin Control vs. 24 hpi :Scrambled Control   | >0.9999 |
| 12 hpi :Biotin Control vs. 24 hpi :Biotin Control      | >0.9999 |
| 12 hpi :Biotin Control vs. 24 hpi :No FISH Control     | 0.1849  |
| 12 hpi :Biotin Control vs. 24 hpi :Mock Control        | 0.1849  |
| 12 hpi :No FISH Control vs. 12 hpi :Mock Control       | >0.9999 |
| 12 hpi :No FISH Control vs. 18 hpi:RSV genome-L        | 0.0189  |
| 12 hpi :No FISH Control vs. 18 hpi:No Primary Control  | 0.0676  |
| 12 hpi :No FISH Control vs. 18 hpi:No V5 Control       | 0.1609  |
| 12 hpi :No FISH Control vs. 18 hpi:Scrambled Control   | >0.9999 |
| 12 hpi :No FISH Control vs. 18 hpi:Biotin Control      | >0.9999 |
| 12 hpi :No FISH Control vs. 18 hpi:No FISH Control     | 0.1951  |
| 12 hpi :No FISH Control vs. 18 hpi:Mock Control        | 0.675   |
| 12 hpi :No FISH Control vs. 24 hpi :RSV genome-L       | <0.0001 |
| 12 hpi :No FISH Control vs. 24 hpi :No Primary Control | 0.1609  |
| 12 hpi :No FISH Control vs. 24 hpi :No V5 Control      | 0.9992  |
| 12 hpi :No FISH Control vs. 24 hpi :Scrambled Control  | >0.9999 |
| 12 hpi :No FISH Control vs. 24 hpi :Biotin Control     | >0.9999 |
| 12 hpi :No FISH Control vs. 24 hpi :No FISH Control    | 0.7312  |
| 12 hpi :No FISH Control vs. 24 hpi :Mock Control       | 0.7312  |
| 12 hpi :Mock Control vs. 18 hpi:RSV genome-L           | 0.1609  |
| 12 hpi :Mock Control vs. 18 hpi:No Primary Control     | 0.0059  |
| 12 hpi :Mock Control vs. 18 hpi:No V5 Control          | 0.0189  |
| 12 hpi :Mock Control vs. 18 hpi:Scrambled Control      | >0.9999 |
| 12 hpi :Mock Control vs. 18 hpi:Biotin Control         | >0.9999 |
| 12 hpi :Mock Control vs. 18 hpi:No FISH Control        | 0.0247  |
| 12 hpi :Mock Control vs. 18 hpi:Mock Control           | 0.1951  |
| 12 hpi :Mock Control vs. 24 hpi :RSV genome-L          | <0.0001 |
| 12 hpi :Mock Control vs. 24 hpi :No Primary Control    | 0.0189  |
| 12 hpi :Mock Control vs. 24 hpi :No V5 Control         | 0.9046  |
| 12 hpi :Mock Control vs. 24 hpi :Scrambled Control     | >0.9999 |
| 12 hpi :Mock Control vs. 24 hpi :Biotin Control        | >0.9999 |
| 12 hpi :Mock Control vs. 24 hpi :No FISH Control       | 0.2341  |
| 12 hpi :Mock Control vs. 24 hpi :Mock Control          | 0.2341  |
| 18 hpi:RSV genome-L vs. 18 hpi:No Primary Control      | <0.0001 |
| 18 hpi:RSV genome-L vs. 18 hpi:No V5 Control           | <0.0001 |
| 18 hpi:RSV genome-L vs. 18 hpi:Scrambled Control       | 0.0032  |
| 18 hpi:RSV genome-L vs. 18 hpi:Biotin Control          | 0.0017  |
| 18 hpi:RSV genome-L vs. 18 hpi:No FISH Control         | <0.0001 |
| 18 hpi:RSV genome-L vs. 18 hpi:Mock Control            | <0.0001 |
| 18 hpi:RSV genome-L vs. 24 hpi :RSV genome-L           | <0.0001 |
| 18 hpi:RSV genome-L vs. 24 hpi :No Primary Control     | <0.0001 |
| 18 hpi:RSV genome-L vs. 24 hpi :No V5 Control          | <0.0001 |
| 18 hpi:RSV genome-L vs. 24 hpi :Scrambled Control      | 0.0017  |
| 18 hpi:RSV genome-L vs. 24 hpi :Biotin Control         | 0.1314  |
| 18 hpi:RSV genome-L vs. 24 hpi :No FISH Control        | <0.0001 |
| 18 hpi:RSV genome-L vs. 24 hpi :Mock Control           | <0.0001 |
| 18 hpi:No Primary Control vs. 18 hpi:No V5 Control     | >0.9999 |

|                                                          |         |
|----------------------------------------------------------|---------|
| 18 hpi:No Primary Control vs. 18 hpi:Scrambled Control   | 0.2341  |
| 18 hpi:No Primary Control vs. 18 hpi:Biotin Control      | 0.3267  |
| 18 hpi:No Primary Control vs. 18 hpi:No FISH Control     | >0.9999 |
| 18 hpi:No Primary Control vs. 18 hpi:Mock Control        | >0.9999 |
| 18 hpi:No Primary Control vs. 24 hpi :RSV genome-L       | <0.0001 |
| 18 hpi:No Primary Control vs. 24 hpi :No Primary Control | >0.9999 |
| 18 hpi:No Primary Control vs. 24 hpi :No V5 Control      | 0.9886  |
| 18 hpi:No Primary Control vs. 24 hpi :Scrambled Control  | 0.3267  |
| 18 hpi:No Primary Control vs. 24 hpi :Biotin Control     | 0.008   |
| 18 hpi:No Primary Control vs. 24 hpi :No FISH Control    | >0.9999 |
| 18 hpi:No Primary Control vs. 24 hpi :Mock Control       | >0.9999 |
| 18 hpi:No V5 Control vs. 18 hpi:Scrambled Control        | 0.4359  |
| 18 hpi:No V5 Control vs. 18 hpi:Biotin Control           | 0.5554  |
| 18 hpi:No V5 Control vs. 18 hpi:No FISH Control          | >0.9999 |
| 18 hpi:No V5 Control vs. 18 hpi:Mock Control             | >0.9999 |
| 18 hpi:No V5 Control vs. 24 hpi :RSV genome-L            | <0.0001 |
| 18 hpi:No V5 Control vs. 24 hpi :No Primary Control      | >0.9999 |
| 18 hpi:No V5 Control vs. 24 hpi :No V5 Control           | 0.9992  |
| 18 hpi:No V5 Control vs. 24 hpi :Scrambled Control       | 0.5554  |
| 18 hpi:No V5 Control vs. 24 hpi :Biotin Control          | 0.0247  |
| 18 hpi:No V5 Control vs. 24 hpi :No FISH Control         | >0.9999 |
| 18 hpi:No V5 Control vs. 24 hpi :Mock Control            | >0.9999 |
| 18 hpi:Scrambled Control vs. 18 hpi:Biotin Control       | >0.9999 |
| 18 hpi:Scrambled Control vs. 18 hpi:No FISH Control      | 0.4949  |
| 18 hpi:Scrambled Control vs. 18 hpi:Mock Control         | 0.9322  |
| 18 hpi:Scrambled Control vs. 24 hpi :RSV genome-L        | <0.0001 |
| 18 hpi:Scrambled Control vs. 24 hpi :No Primary Control  | 0.4359  |
| 18 hpi:Scrambled Control vs. 24 hpi :No V5 Control       | >0.9999 |
| 18 hpi:Scrambled Control vs. 24 hpi :Scrambled Control   | >0.9999 |
| 18 hpi:Scrambled Control vs. 24 hpi :Biotin Control      | >0.9999 |
| 18 hpi:Scrambled Control vs. 24 hpi :No FISH Control     | 0.9536  |
| 18 hpi:Scrambled Control vs. 24 hpi :Mock Control        | 0.9536  |
| 18 hpi:Biotin Control vs. 18 hpi:No FISH Control         | 0.6159  |
| 18 hpi:Biotin Control vs. 18 hpi:Mock Control            | 0.9696  |
| 18 hpi:Biotin Control vs. 24 hpi :RSV genome-L           | <0.0001 |
| 18 hpi:Biotin Control vs. 24 hpi :No Primary Control     | 0.5554  |
| 18 hpi:Biotin Control vs. 24 hpi :No V5 Control          | >0.9999 |
| 18 hpi:Biotin Control vs. 24 hpi :Scrambled Control      | >0.9999 |
| 18 hpi:Biotin Control vs. 24 hpi :Biotin Control         | >0.9999 |
| 18 hpi:Biotin Control vs. 24 hpi :No FISH Control        | 0.981   |
| 18 hpi:Biotin Control vs. 24 hpi :Mock Control           | 0.981   |
| 18 hpi:No FISH Control vs. 18 hpi:Mock Control           | >0.9999 |
| 18 hpi:No FISH Control vs. 24 hpi :RSV genome-L          | <0.0001 |
| 18 hpi:No FISH Control vs. 24 hpi :No Primary Control    | >0.9999 |
| 18 hpi:No FISH Control vs. 24 hpi :No V5 Control         | 0.9997  |
| 18 hpi:No FISH Control vs. 24 hpi :Scrambled Control     | 0.6159  |
| 18 hpi:No FISH Control vs. 24 hpi :Biotin Control        | 0.0322  |
| 18 hpi:No FISH Control vs. 24 hpi :No FISH Control       | >0.9999 |
| 18 hpi:No FISH Control vs. 24 hpi :Mock Control          | >0.9999 |
| 18 hpi:Mock Control vs. 24 hpi :RSV genome-L             | <0.0001 |
| 18 hpi:Mock Control vs. 24 hpi :No Primary Control       | >0.9999 |
| 18 hpi:Mock Control vs. 24 hpi :No V5 Control            | >0.9999 |
| 18 hpi:Mock Control vs. 24 hpi :Scrambled Control        | 0.9696  |
| 18 hpi:Mock Control vs. 24 hpi :Biotin Control           | 0.2341  |



|                                                          |                                          |
|----------------------------------------------------------|------------------------------------------|
| 18 hpi:Mock Control vs. 24 hpi :No FISH Control          | >0.9999                                  |
| 18 hpi:Mock Control vs. 24 hpi :Mock Control             | >0.9999                                  |
| 24 hpi :RSV genome-L vs. 24 hpi :No Primary Control      | <0.0001                                  |
| 24 hpi :RSV genome-L vs. 24 hpi :No V5 Control           | <0.0001                                  |
| 24 hpi :RSV genome-L vs. 24 hpi :Scrambled Control       | <0.0001                                  |
| 24 hpi :RSV genome-L vs. 24 hpi :Biotin Control          | <0.0001                                  |
| 24 hpi :RSV genome-L vs. 24 hpi :No FISH Control         | <0.0001                                  |
| 24 hpi :RSV genome-L vs. 24 hpi :Mock Control            | <0.0001                                  |
| 24 hpi :No Primary Control vs. 24 hpi :No V5 Control     | 0.9992                                   |
| 24 hpi :No Primary Control vs. 24 hpi :Scrambled Control | 0.5554                                   |
| 24 hpi :No Primary Control vs. 24 hpi :Biotin Control    | 0.0247                                   |
| 24 hpi :No Primary Control vs. 24 hpi :No FISH Control   | >0.9999                                  |
| 24 hpi :No Primary Control vs. 24 hpi :Mock Control      | >0.9999                                  |
| 24 hpi :No V5 Control vs. 24 hpi :Scrambled Control      | >0.9999                                  |
| 24 hpi :No V5 Control vs. 24 hpi :Biotin Control         | 0.9322                                   |
| 24 hpi :No V5 Control vs. 24 hpi :No FISH Control        | >0.9999                                  |
| 24 hpi :No V5 Control vs. 24 hpi :Mock Control           | >0.9999                                  |
| 24 hpi :Scrambled Control vs. 24 hpi :Biotin Control     | >0.9999                                  |
| 24 hpi :Scrambled Control vs. 24 hpi :No FISH Control    | 0.981                                    |
| 24 hpi :Scrambled Control vs. 24 hpi :Mock Control       | 0.981                                    |
| 24 hpi :Biotin Control vs. 24 hpi :No FISH Control       | 0.278                                    |
| 24 hpi :Biotin Control vs. 24 hpi :Mock Control          | 0.278                                    |
| 24 hpi :No FISH Control vs. 24 hpi :Mock Control         | >0.9999                                  |
|                                                          |                                          |
| <b>Graph Title</b>                                       | <b>RSV genome-L PLA (Normalized PLA)</b> |
| <b>Comparison</b>                                        | <b>P Value</b>                           |
| 6 hpi                                                    |                                          |
| RSV genome-L vs. No Primary Control                      | 0.0003                                   |
| RSV genome-L vs. No V5 Control                           | <0.0001                                  |
| RSV genome-L vs. Scrambled Control                       | <0.0001                                  |
| RSV genome-L vs. Biotin Control                          | <0.0001                                  |
| RSV genome-L vs. No FISH Control                         | <0.0001                                  |
| No Primary Control vs. No V5 Control                     | 0.895                                    |
| No Primary Control vs. Scrambled Control                 | 0.9837                                   |
| No Primary Control vs. Biotin Control                    | 0.9998                                   |
| No Primary Control vs. No FISH Control                   | 0.8005                                   |
| No V5 Control vs. Scrambled Control                      | 0.9989                                   |
| No V5 Control vs. Biotin Control                         | 0.9676                                   |
| No V5 Control vs. No FISH Control                        | >0.9999                                  |
| Scrambled Control vs. Biotin Control                     | 0.9985                                   |
| Scrambled Control vs. No FISH Control                    | 0.9912                                   |
| Biotin Control vs. No FISH Control                       | 0.9148                                   |
| 8 hpi                                                    |                                          |
| RSV genome-L vs. No Primary Control                      | <0.0001                                  |
| RSV genome-L vs. No V5 Control                           | <0.0001                                  |
| RSV genome-L vs. Scrambled Control                       | <0.0001                                  |
| RSV genome-L vs. Biotin Control                          | 0.0006                                   |
| RSV genome-L vs. No FISH Control                         | <0.0001                                  |
| No Primary Control vs. No V5 Control                     | 0.9994                                   |
| No Primary Control vs. Scrambled Control                 | 0.9997                                   |
| No Primary Control vs. Biotin Control                    | 0.9945                                   |
| No Primary Control vs. No FISH Control                   | >0.9999                                  |
| No V5 Control vs. Scrambled Control                      | >0.9999                                  |
| No V5 Control vs. Biotin Control                         | 0.9518                                   |

|                                          |         |
|------------------------------------------|---------|
| No V5 Control vs. No FISH Control        | 0.9977  |
| Scrambled Control vs. Biotin Control     | 0.9605  |
| Scrambled Control vs. No FISH Control    | 0.9985  |
| Biotin Control vs. No FISH Control       | 0.9982  |
| 12 hpi                                   |         |
| RSV genome-L vs. No Primary Control      | <0.0001 |
| RSV genome-L vs. No V5 Control           | <0.0001 |
| RSV genome-L vs. Scrambled Control       | <0.0001 |
| RSV genome-L vs. Biotin Control          | <0.0001 |
| RSV genome-L vs. No FISH Control         | <0.0001 |
| No Primary Control vs. No V5 Control     | 0.9891  |
| No Primary Control vs. Scrambled Control | 0.057   |
| No Primary Control vs. Biotin Control    | 0.013   |
| No Primary Control vs. No FISH Control   | 0.9978  |
| No V5 Control vs. Scrambled Control      | 0.2467  |
| No V5 Control vs. Biotin Control         | 0.0823  |
| No V5 Control vs. No FISH Control        | >0.9999 |
| Scrambled Control vs. Biotin Control     | 0.9966  |
| Scrambled Control vs. No FISH Control    | 0.17    |
| Biotin Control vs. No FISH Control       | 0.0506  |
| 18 hpi                                   |         |
| RSV genome-L vs. No Primary Control      | 0.9997  |
| RSV genome-L vs. No V5 Control           | 0.9939  |
| RSV genome-L vs. Scrambled Control       | 0.9944  |
| RSV genome-L vs. Biotin Control          | 0.9843  |
| RSV genome-L vs. No FISH Control         | 0.9936  |
| No Primary Control vs. No V5 Control     | 0.9998  |
| No Primary Control vs. Scrambled Control | 0.9998  |
| No Primary Control vs. Biotin Control    | 0.9988  |
| No Primary Control vs. No FISH Control   | 0.9998  |
| No V5 Control vs. Scrambled Control      | >0.9999 |
| No V5 Control vs. Biotin Control         | >0.9999 |
| No V5 Control vs. No FISH Control        | >0.9999 |
| Scrambled Control vs. Biotin Control     | >0.9999 |
| Scrambled Control vs. No FISH Control    | >0.9999 |
| Biotin Control vs. No FISH Control       | >0.9999 |
| 24 hpi                                   |         |
| RSV genome-L vs. No Primary Control      | >0.9999 |
| RSV genome-L vs. No V5 Control           | 0.9891  |
| RSV genome-L vs. Scrambled Control       | 0.9824  |
| RSV genome-L vs. Biotin Control          | 0.533   |
| RSV genome-L vs. No FISH Control         | 0.9992  |
| No Primary Control vs. No V5 Control     | 0.959   |
| No Primary Control vs. Scrambled Control | 0.943   |
| No Primary Control vs. Biotin Control    | 0.3923  |
| No Primary Control vs. No FISH Control   | 0.9925  |
| No V5 Control vs. Scrambled Control      | >0.9999 |
| No V5 Control vs. Biotin Control         | 0.8924  |
| No V5 Control vs. No FISH Control        | 0.9998  |
| Scrambled Control vs. Biotin Control     | 0.9169  |
| Scrambled Control vs. No FISH Control    | 0.9994  |
| Biotin Control vs. No FISH Control       | 0.7627  |

Figure S7B

| Graph Title                                              | NS1 mRNA-L PLA (# of Puncta) |
|----------------------------------------------------------|------------------------------|
| Comparison                                               | P Value                      |
| 6 hpi :NS1 mRNA-L vs. 6 hpi :No Primary Control          | <0.0001                      |
| 6 hpi :NS1 mRNA-L vs. 6 hpi :No V5 Control               | <0.0001                      |
| 6 hpi :NS1 mRNA-L vs. 6 hpi :Scrambled Control           | <0.0001                      |
| 6 hpi :NS1 mRNA-L vs. 6 hpi :Biotin Control              | <0.0001                      |
| 6 hpi :NS1 mRNA-L vs. 6 hpi :No FISH Control             | <0.0001                      |
| 6 hpi :NS1 mRNA-L vs. 6 hpi :Mock Control                | <0.0001                      |
| 6 hpi :NS1 mRNA-L vs. 8 hpi :NS1 mRNA-L                  | <0.0001                      |
| 6 hpi :NS1 mRNA-L vs. 8 hpi :No Primary Control          | <0.0001                      |
| 6 hpi :NS1 mRNA-L vs. 8 hpi :No V5 Control               | <0.0001                      |
| 6 hpi :NS1 mRNA-L vs. 8 hpi :Scrambled Control           | <0.0001                      |
| 6 hpi :NS1 mRNA-L vs. 8 hpi :Biotin Control              | <0.0001                      |
| 6 hpi :NS1 mRNA-L vs. 8 hpi :No FISH Control             | <0.0001                      |
| 6 hpi :NS1 mRNA-L vs. 8 hpi :Mock Control                | <0.0001                      |
| 6 hpi :NS1 mRNA-L vs. 12 hpi :NS1 mRNA-L                 | 0.0076                       |
| 6 hpi :NS1 mRNA-L vs. 12 hpi :No Primary Control         | <0.0001                      |
| 6 hpi :NS1 mRNA-L vs. 12 hpi :No V5 Control              | <0.0001                      |
| 6 hpi :NS1 mRNA-L vs. 12 hpi :Scrambled Control          | <0.0001                      |
| 6 hpi :NS1 mRNA-L vs. 12 hpi :Biotin Control             | <0.0001                      |
| 6 hpi :NS1 mRNA-L vs. 12 hpi :No FISH Control            | <0.0001                      |
| 6 hpi :NS1 mRNA-L vs. 12 hpi :Mock Control               | >0.9999                      |
| 6 hpi :NS1 mRNA-L vs. 18 hpi :NS1 mRNA-L                 | 0.0002                       |
| 6 hpi :NS1 mRNA-L vs. 18 hpi :No Primary Control         | <0.0001                      |
| 6 hpi :NS1 mRNA-L vs. 18 hpi :No V5 Control              | <0.0001                      |
| 6 hpi :NS1 mRNA-L vs. 18 hpi :Scrambled Control          | <0.0001                      |
| 6 hpi :NS1 mRNA-L vs. 18 hpi :Biotin Control             | <0.0001                      |
| 6 hpi :NS1 mRNA-L vs. 18 hpi :No FISH Control            | <0.0001                      |
| 6 hpi :NS1 mRNA-L vs. 18 hpi :Mock Control               | <0.0001                      |
| 6 hpi :NS1 mRNA-L vs. 24 hpi :NS1 mRNA-L                 | 0.9998                       |
| 6 hpi :NS1 mRNA-L vs. 24 hpi :No Primary Control         | <0.0001                      |
| 6 hpi :NS1 mRNA-L vs. 24 hpi :No V5 Control              | <0.0001                      |
| 6 hpi :NS1 mRNA-L vs. 24 hpi :Scrambled Control          | <0.0001                      |
| 6 hpi :NS1 mRNA-L vs. 24 hpi :Biotin Control             | <0.0001                      |
| 6 hpi :NS1 mRNA-L vs. 24 hpi :No FISH Control            | <0.0001                      |
| 6 hpi :NS1 mRNA-L vs. 24 hpi :Mock Control               | <0.0001                      |
| 6 hpi :No Primary Control vs. 6 hpi :No V5 Control       | >0.9999                      |
| 6 hpi :No Primary Control vs. 6 hpi :Scrambled Control   | >0.9999                      |
| 6 hpi :No Primary Control vs. 6 hpi :Biotin Control      | >0.9999                      |
| 6 hpi :No Primary Control vs. 6 hpi :No FISH Control     | >0.9999                      |
| 6 hpi :No Primary Control vs. 6 hpi :Mock Control        | 0.1407                       |
| 6 hpi :No Primary Control vs. 8 hpi :NS1 mRNA-L          | <0.0001                      |
| 6 hpi :No Primary Control vs. 8 hpi :No Primary Control  | >0.9999                      |
| 6 hpi :No Primary Control vs. 8 hpi :No V5 Control       | >0.9999                      |
| 6 hpi :No Primary Control vs. 8 hpi :Scrambled Control   | >0.9999                      |
| 6 hpi :No Primary Control vs. 8 hpi :Biotin Control      | 0.9996                       |
| 6 hpi :No Primary Control vs. 8 hpi :No FISH Control     | >0.9999                      |
| 6 hpi :No Primary Control vs. 8 hpi :Mock Control        | 0.0011                       |
| 6 hpi :No Primary Control vs. 12 hpi :NS1 mRNA-L         | <0.0001                      |
| 6 hpi :No Primary Control vs. 12 hpi :No Primary Control | >0.9999                      |
| 6 hpi :No Primary Control vs. 12 hpi :No V5 Control      | 0.7223                       |
| 6 hpi :No Primary Control vs. 12 hpi :Scrambled Control  | 0.2336                       |
| 6 hpi :No Primary Control vs. 12 hpi :Biotin Control     | 0.062                        |
| 6 hpi :No Primary Control vs. 12 hpi :No FISH Control    | 0.3602                       |

|                                                          |         |
|----------------------------------------------------------|---------|
| 6 hpi :No Primary Control vs. 12 hpi :Mock Control       | <0.0001 |
| 6 hpi :No Primary Control vs. 18 hpi:NS1 mRNA-L          | <0.0001 |
| 6 hpi :No Primary Control vs. 18 hpi:No Primary Control  | >0.9999 |
| 6 hpi :No Primary Control vs. 18 hpi:No V5 Control       | >0.9999 |
| 6 hpi :No Primary Control vs. 18 hpi:Scrambled Control   | 0.6722  |
| 6 hpi :No Primary Control vs. 18 hpi:Biotin Control      | 0.7692  |
| 6 hpi :No Primary Control vs. 18 hpi:No FISH Control     | >0.9999 |
| 6 hpi :No Primary Control vs. 18 hpi:Mock Control        | 0.0002  |
| 6 hpi :No Primary Control vs. 24 hpi :NS1 mRNA-L         | <0.0001 |
| 6 hpi :No Primary Control vs. 24 hpi :No Primary Control | >0.9999 |
| 6 hpi :No Primary Control vs. 24 hpi :No V5 Control      | >0.9999 |
| 6 hpi :No Primary Control vs. 24 hpi :Scrambled Control  | 0.7692  |
| 6 hpi :No Primary Control vs. 24 hpi :Biotin Control     | 0.0966  |
| 6 hpi :No Primary Control vs. 24 hpi :No FISH Control    | >0.9999 |
| 6 hpi :No Primary Control vs. 24 hpi :Mock Control       | 0.8841  |
| 6 hpi :No V5 Control vs. 6 hpi :Scrambled Control        | >0.9999 |
| 6 hpi :No V5 Control vs. 6 hpi :Biotin Control           | >0.9999 |
| 6 hpi :No V5 Control vs. 6 hpi :No FISH Control          | 0.9993  |
| 6 hpi :No V5 Control vs. 6 hpi :Mock Control             | 0.46    |
| 6 hpi :No V5 Control vs. 8 hpi :NS1 mRNA-L               | <0.0001 |
| 6 hpi :No V5 Control vs. 8 hpi :No Primary Control       | >0.9999 |
| 6 hpi :No V5 Control vs. 8 hpi :No V5 Control            | >0.9999 |
| 6 hpi :No V5 Control vs. 8 hpi :Scrambled Control        | >0.9999 |
| 6 hpi :No V5 Control vs. 8 hpi :Biotin Control           | >0.9999 |
| 6 hpi :No V5 Control vs. 8 hpi :No FISH Control          | >0.9999 |
| 6 hpi :No V5 Control vs. 8 hpi :Mock Control             | 0.0099  |
| 6 hpi :No V5 Control vs. 12 hpi :NS1 mRNA-L              | <0.0001 |
| 6 hpi :No V5 Control vs. 12 hpi :No Primary Control      | >0.9999 |
| 6 hpi :No V5 Control vs. 12 hpi :No V5 Control           | 0.9684  |
| 6 hpi :No V5 Control vs. 12 hpi :Scrambled Control       | 0.6199  |
| 6 hpi :No V5 Control vs. 12 hpi :Biotin Control          | 0.2622  |
| 6 hpi :No V5 Control vs. 12 hpi :No FISH Control         | 0.7692  |
| 6 hpi :No V5 Control vs. 12 hpi :Mock Control            | <0.0001 |
| 6 hpi :No V5 Control vs. 18 hpi:NS1 mRNA-L               | <0.0001 |
| 6 hpi :No V5 Control vs. 18 hpi:No Primary Control       | >0.9999 |
| 6 hpi :No V5 Control vs. 18 hpi:No V5 Control            | >0.9999 |
| 6 hpi :No V5 Control vs. 18 hpi:Scrambled Control        | 0.9542  |
| 6 hpi :No V5 Control vs. 18 hpi:Biotin Control           | 0.979   |
| 6 hpi :No V5 Control vs. 18 hpi:No FISH Control          | >0.9999 |
| 6 hpi :No V5 Control vs. 18 hpi:Mock Control             | 0.0019  |
| 6 hpi :No V5 Control vs. 24 hpi :NS1 mRNA-L              | <0.0001 |
| 6 hpi :No V5 Control vs. 24 hpi :No Primary Control      | >0.9999 |
| 6 hpi :No V5 Control vs. 24 hpi :No V5 Control           | >0.9999 |
| 6 hpi :No V5 Control vs. 24 hpi :Scrambled Control       | 0.979   |
| 6 hpi :No V5 Control vs. 24 hpi :Biotin Control          | 0.3602  |
| 6 hpi :No V5 Control vs. 24 hpi :No FISH Control         | >0.9999 |
| 6 hpi :No V5 Control vs. 24 hpi :Mock Control            | 0.9951  |
| 6 hpi :Scrambled Control vs. 6 hpi :Biotin Control       | >0.9999 |
| 6 hpi :Scrambled Control vs. 6 hpi :No FISH Control      | >0.9999 |
| 6 hpi :Scrambled Control vs. 6 hpi :Mock Control         | 0.1679  |
| 6 hpi :Scrambled Control vs. 8 hpi :NS1 mRNA-L           | <0.0001 |
| 6 hpi :Scrambled Control vs. 8 hpi :No Primary Control   | >0.9999 |
| 6 hpi :Scrambled Control vs. 8 hpi :No V5 Control        | >0.9999 |
| 6 hpi :Scrambled Control vs. 8 hpi :Scrambled Control    | >0.9999 |

|                                                         |         |
|---------------------------------------------------------|---------|
| 6 hpi :Scrambled Control vs. 8 hpi :Biotin Control      | 0.9998  |
| 6 hpi :Scrambled Control vs. 8 hpi :No FISH Control     | >0.9999 |
| 6 hpi :Scrambled Control vs. 8 hpi :Mock Control        | 0.0014  |
| 6 hpi :Scrambled Control vs. 12 hpi :NS1 mRNA-L         | <0.0001 |
| 6 hpi :Scrambled Control vs. 12 hpi :No Primary Control | >0.9999 |
| 6 hpi :Scrambled Control vs. 12 hpi :No V5 Control      | 0.7692  |
| 6 hpi :Scrambled Control vs. 12 hpi :Scrambled Control  | 0.2722  |
| 6 hpi :Scrambled Control vs. 12 hpi :Biotin Control     | 0.0761  |
| 6 hpi :Scrambled Control vs. 12 hpi :No FISH Control    | 0.4089  |
| 6 hpi :Scrambled Control vs. 12 hpi :Mock Control       | <0.0001 |
| 6 hpi :Scrambled Control vs. 18 hpi :NS1 mRNA-L         | <0.0001 |
| 6 hpi :Scrambled Control vs. 18 hpi :No Primary Control | >0.9999 |
| 6 hpi :Scrambled Control vs. 18 hpi :No V5 Control      | >0.9999 |
| 6 hpi :Scrambled Control vs. 18 hpi :Scrambled Control  | 0.7223  |
| 6 hpi :Scrambled Control vs. 18 hpi :Biotin Control     | 0.8122  |
| 6 hpi :Scrambled Control vs. 18 hpi :No FISH Control    | >0.9999 |
| 6 hpi :Scrambled Control vs. 18 hpi :Mock Control       | 0.0002  |
| 6 hpi :Scrambled Control vs. 24 hpi :NS1 mRNA-L         | <0.0001 |
| 6 hpi :Scrambled Control vs. 24 hpi :No Primary Control | >0.9999 |
| 6 hpi :Scrambled Control vs. 24 hpi :No V5 Control      | >0.9999 |
| 6 hpi :Scrambled Control vs. 24 hpi :Scrambled Control  | 0.8122  |
| 6 hpi :Scrambled Control vs. 24 hpi :Biotin Control     | 0.117   |
| 6 hpi :Scrambled Control vs. 24 hpi :No FISH Control    | >0.9999 |
| 6 hpi :Scrambled Control vs. 24 hpi :Mock Control       | 0.9124  |
| 6 hpi :Biotin Control vs. 6 hpi :No FISH Control        | >0.9999 |
| 6 hpi :Biotin Control vs. 6 hpi :Mock Control           | 0.2722  |
| 6 hpi :Biotin Control vs. 8 hpi :NS1 mRNA-L             | <0.0001 |
| 6 hpi :Biotin Control vs. 8 hpi :No Primary Control     | >0.9999 |
| 6 hpi :Biotin Control vs. 8 hpi :No V5 Control          | >0.9999 |
| 6 hpi :Biotin Control vs. 8 hpi :Scrambled Control      | >0.9999 |
| 6 hpi :Biotin Control vs. 8 hpi :Biotin Control         | >0.9999 |
| 6 hpi :Biotin Control vs. 8 hpi :No FISH Control        | >0.9999 |
| 6 hpi :Biotin Control vs. 8 hpi :Mock Control           | 0.0034  |
| 6 hpi :Biotin Control vs. 12 hpi :NS1 mRNA-L            | <0.0001 |
| 6 hpi :Biotin Control vs. 12 hpi :No Primary Control    | >0.9999 |
| 6 hpi :Biotin Control vs. 12 hpi :No V5 Control         | 0.8841  |
| 6 hpi :Biotin Control vs. 12 hpi :Scrambled Control     | 0.4089  |
| 6 hpi :Biotin Control vs. 12 hpi :Biotin Control        | 0.1353  |
| 6 hpi :Biotin Control vs. 12 hpi :No FISH Control       | 0.5664  |
| 6 hpi :Biotin Control vs. 12 hpi :Mock Control          | <0.0001 |
| 6 hpi :Biotin Control vs. 18 hpi :NS1 mRNA-L            | <0.0001 |
| 6 hpi :Biotin Control vs. 18 hpi :No Primary Control    | >0.9999 |
| 6 hpi :Biotin Control vs. 18 hpi :No V5 Control         | >0.9999 |
| 6 hpi :Biotin Control vs. 18 hpi :Scrambled Control     | 0.8507  |
| 6 hpi :Biotin Control vs. 18 hpi :Biotin Control        | 0.9124  |
| 6 hpi :Biotin Control vs. 18 hpi :No FISH Control       | >0.9999 |
| 6 hpi :Biotin Control vs. 18 hpi :Mock Control          | 0.0006  |
| 6 hpi :Biotin Control vs. 24 hpi :NS1 mRNA-L            | <0.0001 |
| 6 hpi :Biotin Control vs. 24 hpi :No Primary Control    | >0.9999 |
| 6 hpi :Biotin Control vs. 24 hpi :No V5 Control         | >0.9999 |
| 6 hpi :Biotin Control vs. 24 hpi :Scrambled Control     | 0.9124  |
| 6 hpi :Biotin Control vs. 24 hpi :Biotin Control        | 0.1989  |
| 6 hpi :Biotin Control vs. 24 hpi :No FISH Control       | >0.9999 |
| 6 hpi :Biotin Control vs. 24 hpi :Mock Control          | 0.9684  |

|                                                       |         |
|-------------------------------------------------------|---------|
| 6 hpi :No FISH Control vs. 6 hpi :Mock Control        | 0.0014  |
| 6 hpi :No FISH Control vs. 8 hpi :NS1 mRNA-L          | <0.0001 |
| 6 hpi :No FISH Control vs. 8 hpi :No Primary Control  | >0.9999 |
| 6 hpi :No FISH Control vs. 8 hpi :No V5 Control       | 0.9998  |
| 6 hpi :No FISH Control vs. 8 hpi :Scrambled Control   | >0.9999 |
| 6 hpi :No FISH Control vs. 8 hpi :Biotin Control      | 0.5664  |
| 6 hpi :No FISH Control vs. 8 hpi :No FISH Control     | >0.9999 |
| 6 hpi :No FISH Control vs. 8 hpi :Mock Control        | <0.0001 |
| 6 hpi :No FISH Control vs. 12 hpi :NS1 mRNA-L         | <0.0001 |
| 6 hpi :No FISH Control vs. 12 hpi :No Primary Control | >0.9999 |
| 6 hpi :No FISH Control vs. 12 hpi :No V5 Control      | 0.0418  |
| 6 hpi :No FISH Control vs. 12 hpi :Scrambled Control  | 0.0034  |
| 6 hpi :No FISH Control vs. 12 hpi :Biotin Control     | 0.0004  |
| 6 hpi :No FISH Control vs. 12 hpi :No FISH Control    | 0.0076  |
| 6 hpi :No FISH Control vs. 12 hpi :Mock Control       | <0.0001 |
| 6 hpi :No FISH Control vs. 18 hpi:NS1 mRNA-L          | <0.0001 |
| 6 hpi :No FISH Control vs. 18 hpi:No Primary Control  | >0.9999 |
| 6 hpi :No FISH Control vs. 18 hpi:No V5 Control       | >0.9999 |
| 6 hpi :No FISH Control vs. 18 hpi:Scrambled Control   | 0.0334  |
| 6 hpi :No FISH Control vs. 18 hpi:Biotin Control      | 0.0521  |
| 6 hpi :No FISH Control vs. 18 hpi:No FISH Control     | >0.9999 |
| 6 hpi :No FISH Control vs. 18 hpi:Mock Control        | <0.0001 |
| 6 hpi :No FISH Control vs. 24 hpi :NS1 mRNA-L         | <0.0001 |
| 6 hpi :No FISH Control vs. 24 hpi :No Primary Control | 0.979   |
| 6 hpi :No FISH Control vs. 24 hpi :No V5 Control      | 0.9866  |
| 6 hpi :No FISH Control vs. 24 hpi :Scrambled Control  | 0.0521  |
| 6 hpi :No FISH Control vs. 24 hpi :Biotin Control     | 0.0008  |
| 6 hpi :No FISH Control vs. 24 hpi :No FISH Control    | 0.9917  |
| 6 hpi :No FISH Control vs. 24 hpi :Mock Control       | 0.0966  |
| 6 hpi :Mock Control vs. 8 hpi :NS1 mRNA-L             | 0.2336  |
| 6 hpi :Mock Control vs. 8 hpi :No Primary Control     | 0.2722  |
| 6 hpi :Mock Control vs. 8 hpi :No V5 Control          | 0.3602  |
| 6 hpi :Mock Control vs. 8 hpi :Scrambled Control      | 0.0334  |
| 6 hpi :Mock Control vs. 8 hpi :Biotin Control         | 0.9973  |
| 6 hpi :Mock Control vs. 8 hpi :No FISH Control        | 0.117   |
| 6 hpi :Mock Control vs. 8 hpi :Mock Control           | >0.9999 |
| 6 hpi :Mock Control vs. 12 hpi :NS1 mRNA-L            | <0.0001 |
| 6 hpi :Mock Control vs. 12 hpi :No Primary Control    | 0.0209  |
| 6 hpi :Mock Control vs. 12 hpi :No V5 Control         | >0.9999 |
| 6 hpi :Mock Control vs. 12 hpi :Scrambled Control     | >0.9999 |
| 6 hpi :Mock Control vs. 12 hpi :Biotin Control        | >0.9999 |
| 6 hpi :Mock Control vs. 12 hpi :No FISH Control       | >0.9999 |
| 6 hpi :Mock Control vs. 12 hpi :Mock Control          | <0.0001 |
| 6 hpi :Mock Control vs. 18 hpi:NS1 mRNA-L             | 0.0334  |
| 6 hpi :Mock Control vs. 18 hpi:No Primary Control     | 0.0791  |
| 6 hpi :Mock Control vs. 18 hpi:No V5 Control          | 0.117   |
| 6 hpi :Mock Control vs. 18 hpi:Scrambled Control      | >0.9999 |
| 6 hpi :Mock Control vs. 18 hpi:Biotin Control         | >0.9999 |
| 6 hpi :Mock Control vs. 18 hpi:No FISH Control        | 0.1989  |
| 6 hpi :Mock Control vs. 18 hpi:Mock Control           | 0.9996  |
| 6 hpi :Mock Control vs. 24 hpi :NS1 mRNA-L            | <0.0001 |
| 6 hpi :Mock Control vs. 24 hpi :No Primary Control    | 0.7692  |
| 6 hpi :Mock Control vs. 24 hpi :No V5 Control         | 0.7223  |
| 6 hpi :Mock Control vs. 24 hpi :Scrambled Control     | >0.9999 |

|                                                          |         |
|----------------------------------------------------------|---------|
| 6 hpi :Mock Control vs. 24 hpi :Biotin Control           | >0.9999 |
| 6 hpi :Mock Control vs. 24 hpi :No FISH Control          | 0.6722  |
| 6 hpi :Mock Control vs. 24 hpi :Mock Control             | >0.9999 |
| 8 hpi :NS1 mRNA-L vs. 8 hpi :No Primary Control          | <0.0001 |
| 8 hpi :NS1 mRNA-L vs. 8 hpi :No V5 Control               | <0.0001 |
| 8 hpi :NS1 mRNA-L vs. 8 hpi :Scrambled Control           | <0.0001 |
| 8 hpi :NS1 mRNA-L vs. 8 hpi :Biotin Control              | 0.0002  |
| 8 hpi :NS1 mRNA-L vs. 8 hpi :No FISH Control             | <0.0001 |
| 8 hpi :NS1 mRNA-L vs. 8 hpi :Mock Control                | 0.9866  |
| 8 hpi :NS1 mRNA-L vs. 12 hpi :NS1 mRNA-L                 | <0.0001 |
| 8 hpi :NS1 mRNA-L vs. 12 hpi :No Primary Control         | <0.0001 |
| 8 hpi :NS1 mRNA-L vs. 12 hpi :No V5 Control              | 0.0163  |
| 8 hpi :NS1 mRNA-L vs. 12 hpi :Scrambled Control          | 0.1407  |
| 8 hpi :NS1 mRNA-L vs. 12 hpi :Biotin Control             | 0.4648  |
| 8 hpi :NS1 mRNA-L vs. 12 hpi :No FISH Control            | 0.0791  |
| 8 hpi :NS1 mRNA-L vs. 12 hpi :Mock Control               | 0.0099  |
| 8 hpi :NS1 mRNA-L vs. 18 hpi :NS1 mRNA-L                 | >0.9999 |
| 8 hpi :NS1 mRNA-L vs. 18 hpi :No Primary Control         | <0.0001 |
| 8 hpi :NS1 mRNA-L vs. 18 hpi :No V5 Control              | <0.0001 |
| 8 hpi :NS1 mRNA-L vs. 18 hpi :Scrambled Control          | 0.0209  |
| 8 hpi :NS1 mRNA-L vs. 18 hpi :Biotin Control             | 0.0127  |
| 8 hpi :NS1 mRNA-L vs. 18 hpi :No FISH Control            | <0.0001 |
| 8 hpi :NS1 mRNA-L vs. 18 hpi :Mock Control               | 0.9996  |
| 8 hpi :NS1 mRNA-L vs. 24 hpi :NS1 mRNA-L                 | <0.0001 |
| 8 hpi :NS1 mRNA-L vs. 24 hpi :No Primary Control         | <0.0001 |
| 8 hpi :NS1 mRNA-L vs. 24 hpi :No V5 Control              | <0.0001 |
| 8 hpi :NS1 mRNA-L vs. 24 hpi :Scrambled Control          | 0.0127  |
| 8 hpi :NS1 mRNA-L vs. 24 hpi :Biotin Control             | 0.3145  |
| 8 hpi :NS1 mRNA-L vs. 24 hpi :No FISH Control            | <0.0001 |
| 8 hpi :NS1 mRNA-L vs. 24 hpi :Mock Control               | 0.0058  |
| 8 hpi :No Primary Control vs. 8 hpi :No V5 Control       | >0.9999 |
| 8 hpi :No Primary Control vs. 8 hpi :Scrambled Control   | >0.9999 |
| 8 hpi :No Primary Control vs. 8 hpi :Biotin Control      | >0.9999 |
| 8 hpi :No Primary Control vs. 8 hpi :No FISH Control     | >0.9999 |
| 8 hpi :No Primary Control vs. 8 hpi :Mock Control        | 0.0034  |
| 8 hpi :No Primary Control vs. 12 hpi :NS1 mRNA-L         | <0.0001 |
| 8 hpi :No Primary Control vs. 12 hpi :No Primary Control | >0.9999 |
| 8 hpi :No Primary Control vs. 12 hpi :No V5 Control      | 0.8841  |
| 8 hpi :No Primary Control vs. 12 hpi :Scrambled Control  | 0.4089  |
| 8 hpi :No Primary Control vs. 12 hpi :Biotin Control     | 0.1353  |
| 8 hpi :No Primary Control vs. 12 hpi :No FISH Control    | 0.5664  |
| 8 hpi :No Primary Control vs. 12 hpi :Mock Control       | <0.0001 |
| 8 hpi :No Primary Control vs. 18 hpi :NS1 mRNA-L         | <0.0001 |
| 8 hpi :No Primary Control vs. 18 hpi :No Primary Control | >0.9999 |
| 8 hpi :No Primary Control vs. 18 hpi :No V5 Control      | >0.9999 |
| 8 hpi :No Primary Control vs. 18 hpi :Scrambled Control  | 0.8507  |
| 8 hpi :No Primary Control vs. 18 hpi :Biotin Control     | 0.9124  |
| 8 hpi :No Primary Control vs. 18 hpi :No FISH Control    | >0.9999 |
| 8 hpi :No Primary Control vs. 18 hpi :Mock Control       | 0.0006  |
| 8 hpi :No Primary Control vs. 24 hpi :NS1 mRNA-L         | <0.0001 |
| 8 hpi :No Primary Control vs. 24 hpi :No Primary Control | >0.9999 |
| 8 hpi :No Primary Control vs. 24 hpi :No V5 Control      | >0.9999 |
| 8 hpi :No Primary Control vs. 24 hpi :Scrambled Control  | 0.9124  |
| 8 hpi :No Primary Control vs. 24 hpi :Biotin Control     | 0.1989  |

|                                                         |         |
|---------------------------------------------------------|---------|
| 8 hpi :No Primary Control vs. 24 hpi :No FISH Control   | >0.9999 |
| 8 hpi :No Primary Control vs. 24 hpi :Mock Control      | 0.9684  |
| 8 hpi :No V5 Control vs. 8 hpi :Scrambled Control       | >0.9999 |
| 8 hpi :No V5 Control vs. 8 hpi :Biotin Control          | >0.9999 |
| 8 hpi :No V5 Control vs. 8 hpi :No FISH Control         | >0.9999 |
| 8 hpi :No V5 Control vs. 8 hpi :Mock Control            | 0.0058  |
| 8 hpi :No V5 Control vs. 12 hpi :NS1 mRNA-L             | <0.0001 |
| 8 hpi :No V5 Control vs. 12 hpi :No Primary Control     | >0.9999 |
| 8 hpi :No V5 Control vs. 12 hpi :No V5 Control          | 0.9357  |
| 8 hpi :No V5 Control vs. 12 hpi :Scrambled Control      | 0.5128  |
| 8 hpi :No V5 Control vs. 12 hpi :Biotin Control         | 0.1913  |
| 8 hpi :No V5 Control vs. 12 hpi :No FISH Control        | 0.6722  |
| 8 hpi :No V5 Control vs. 12 hpi :Mock Control           | <0.0001 |
| 8 hpi :No V5 Control vs. 18 hpi:NS1 mRNA-L              | <0.0001 |
| 8 hpi :No V5 Control vs. 18 hpi:No Primary Control      | >0.9999 |
| 8 hpi :No V5 Control vs. 18 hpi:No V5 Control           | >0.9999 |
| 8 hpi :No V5 Control vs. 18 hpi:Scrambled Control       | 0.9124  |
| 8 hpi :No V5 Control vs. 18 hpi:Biotin Control          | 0.9542  |
| 8 hpi :No V5 Control vs. 18 hpi:No FISH Control         | >0.9999 |
| 8 hpi :No V5 Control vs. 18 hpi:Mock Control            | 0.0011  |
| 8 hpi :No V5 Control vs. 24 hpi :NS1 mRNA-L             | <0.0001 |
| 8 hpi :No V5 Control vs. 24 hpi :No Primary Control     | >0.9999 |
| 8 hpi :No V5 Control vs. 24 hpi :No V5 Control          | >0.9999 |
| 8 hpi :No V5 Control vs. 24 hpi :Scrambled Control      | 0.9542  |
| 8 hpi :No V5 Control vs. 24 hpi :Biotin Control         | 0.2722  |
| 8 hpi :No V5 Control vs. 24 hpi :No FISH Control        | >0.9999 |
| 8 hpi :No V5 Control vs. 24 hpi :Mock Control           | 0.9866  |
| 8 hpi :Scrambled Control vs. 8 hpi :Biotin Control      | 0.979   |
| 8 hpi :Scrambled Control vs. 8 hpi :No FISH Control     | >0.9999 |
| 8 hpi :Scrambled Control vs. 8 hpi :Mock Control        | 0.0001  |
| 8 hpi :Scrambled Control vs. 12 hpi :NS1 mRNA-L         | <0.0001 |
| 8 hpi :Scrambled Control vs. 12 hpi :No Primary Control | >0.9999 |
| 8 hpi :Scrambled Control vs. 12 hpi :No V5 Control      | 0.3602  |
| 8 hpi :Scrambled Control vs. 12 hpi :Scrambled Control  | 0.0644  |
| 8 hpi :Scrambled Control vs. 12 hpi :Biotin Control     | 0.0124  |
| 8 hpi :Scrambled Control vs. 12 hpi :No FISH Control    | 0.117   |
| 8 hpi :Scrambled Control vs. 12 hpi :Mock Control       | <0.0001 |
| 8 hpi :Scrambled Control vs. 18 hpi:NS1 mRNA-L          | <0.0001 |
| 8 hpi :Scrambled Control vs. 18 hpi:No Primary Control  | >0.9999 |
| 8 hpi :Scrambled Control vs. 18 hpi:No V5 Control       | >0.9999 |
| 8 hpi :Scrambled Control vs. 18 hpi:Scrambled Control   | 0.3145  |
| 8 hpi :Scrambled Control vs. 18 hpi:Biotin Control      | 0.4089  |
| 8 hpi :Scrambled Control vs. 18 hpi:No FISH Control     | >0.9999 |
| 8 hpi :Scrambled Control vs. 18 hpi:Mock Control        | <0.0001 |
| 8 hpi :Scrambled Control vs. 24 hpi :NS1 mRNA-L         | <0.0001 |
| 8 hpi :Scrambled Control vs. 24 hpi :No Primary Control | >0.9999 |
| 8 hpi :Scrambled Control vs. 24 hpi :No V5 Control      | >0.9999 |
| 8 hpi :Scrambled Control vs. 24 hpi :Scrambled Control  | 0.4089  |
| 8 hpi :Scrambled Control vs. 24 hpi :Biotin Control     | 0.0209  |
| 8 hpi :Scrambled Control vs. 24 hpi :No FISH Control    | >0.9999 |
| 8 hpi :Scrambled Control vs. 24 hpi :Mock Control       | 0.5664  |
| 8 hpi :Biotin Control vs. 8 hpi :No FISH Control        | 0.9993  |
| 8 hpi :Biotin Control vs. 8 hpi :Mock Control           | 0.3602  |
| 8 hpi :Biotin Control vs. 12 hpi :NS1 mRNA-L            | <0.0001 |



|                                                       |         |
|-------------------------------------------------------|---------|
| 8 hpi :Biotin Control vs. 12 hpi :No Primary Control  | 0.9542  |
| 8 hpi :Biotin Control vs. 12 hpi :No V5 Control       | >0.9999 |
| 8 hpi :Biotin Control vs. 12 hpi :Scrambled Control   | 0.9996  |
| 8 hpi :Biotin Control vs. 12 hpi :Biotin Control      | 0.9752  |
| 8 hpi :Biotin Control vs. 12 hpi :No FISH Control     | >0.9999 |
| 8 hpi :Biotin Control vs. 12 hpi :Mock Control        | <0.0001 |
| 8 hpi :Biotin Control vs. 18 hpi:NS1 mRNA-L           | <0.0001 |
| 8 hpi :Biotin Control vs. 18 hpi:No Primary Control   | 0.9973  |
| 8 hpi :Biotin Control vs. 18 hpi:No V5 Control        | 0.9993  |
| 8 hpi :Biotin Control vs. 18 hpi:Scrambled Control    | >0.9999 |
| 8 hpi :Biotin Control vs. 18 hpi:Biotin Control       | >0.9999 |
| 8 hpi :Biotin Control vs. 18 hpi:No FISH Control      | >0.9999 |
| 8 hpi :Biotin Control vs. 18 hpi:Mock Control         | 0.1407  |
| 8 hpi :Biotin Control vs. 24 hpi :NS1 mRNA-L          | <0.0001 |
| 8 hpi :Biotin Control vs. 24 hpi :No Primary Control  | >0.9999 |
| 8 hpi :Biotin Control vs. 24 hpi :No V5 Control       | >0.9999 |
| 8 hpi :Biotin Control vs. 24 hpi :Scrambled Control   | >0.9999 |
| 8 hpi :Biotin Control vs. 24 hpi :Biotin Control      | 0.9917  |
| 8 hpi :Biotin Control vs. 24 hpi :No FISH Control     | >0.9999 |
| 8 hpi :Biotin Control vs. 24 hpi :Mock Control        | >0.9999 |
| 8 hpi :No FISH Control vs. 8 hpi :Mock Control        | 0.0008  |
| 8 hpi :No FISH Control vs. 12 hpi :NS1 mRNA-L         | <0.0001 |
| 8 hpi :No FISH Control vs. 12 hpi :No Primary Control | >0.9999 |
| 8 hpi :No FISH Control vs. 12 hpi :No V5 Control      | 0.6722  |
| 8 hpi :No FISH Control vs. 12 hpi :Scrambled Control  | 0.1989  |
| 8 hpi :No FISH Control vs. 12 hpi :Biotin Control     | 0.0501  |
| 8 hpi :No FISH Control vs. 12 hpi :No FISH Control    | 0.3145  |
| 8 hpi :No FISH Control vs. 12 hpi :Mock Control       | <0.0001 |
| 8 hpi :No FISH Control vs. 18 hpi:NS1 mRNA-L          | <0.0001 |
| 8 hpi :No FISH Control vs. 18 hpi:No Primary Control  | >0.9999 |
| 8 hpi :No FISH Control vs. 18 hpi:No V5 Control       | >0.9999 |
| 8 hpi :No FISH Control vs. 18 hpi:Scrambled Control   | 0.6199  |
| 8 hpi :No FISH Control vs. 18 hpi:Biotin Control      | 0.7223  |
| 8 hpi :No FISH Control vs. 18 hpi:No FISH Control     | >0.9999 |
| 8 hpi :No FISH Control vs. 18 hpi:Mock Control        | 0.0001  |
| 8 hpi :No FISH Control vs. 24 hpi :NS1 mRNA-L         | <0.0001 |
| 8 hpi :No FISH Control vs. 24 hpi :No Primary Control | >0.9999 |
| 8 hpi :No FISH Control vs. 24 hpi :No V5 Control      | >0.9999 |
| 8 hpi :No FISH Control vs. 24 hpi :Scrambled Control  | 0.7223  |
| 8 hpi :No FISH Control vs. 24 hpi :Biotin Control     | 0.0791  |
| 8 hpi :No FISH Control vs. 24 hpi :No FISH Control    | >0.9999 |
| 8 hpi :No FISH Control vs. 24 hpi :Mock Control       | 0.8507  |
| 8 hpi :Mock Control vs. 12 hpi :NS1 mRNA-L            | <0.0001 |
| 8 hpi :Mock Control vs. 12 hpi :No Primary Control    | <0.0001 |
| 8 hpi :Mock Control vs. 12 hpi :No V5 Control         | 0.979   |
| 8 hpi :Mock Control vs. 12 hpi :Scrambled Control     | >0.9999 |
| 8 hpi :Mock Control vs. 12 hpi :Biotin Control        | >0.9999 |
| 8 hpi :Mock Control vs. 12 hpi :No FISH Control       | 0.9996  |
| 8 hpi :Mock Control vs. 12 hpi :Mock Control          | <0.0001 |
| 8 hpi :Mock Control vs. 18 hpi:NS1 mRNA-L             | 0.7223  |
| 8 hpi :Mock Control vs. 18 hpi:No Primary Control     | 0.0004  |
| 8 hpi :Mock Control vs. 18 hpi:No V5 Control          | 0.0008  |
| 8 hpi :Mock Control vs. 18 hpi:Scrambled Control      | 0.9866  |
| 8 hpi :Mock Control vs. 18 hpi:Biotin Control         | 0.9684  |

|                                                           |         |
|-----------------------------------------------------------|---------|
| 8 hpi :Mock Control vs. 18 hpi:No FISH Control            | 0.0019  |
| 8 hpi :Mock Control vs. 18 hpi:Mock Control               | >0.9999 |
| 8 hpi :Mock Control vs. 24 hpi :NS1 mRNA-L                | <0.0001 |
| 8 hpi :Mock Control vs. 24 hpi :No Primary Control        | 0.0418  |
| 8 hpi :Mock Control vs. 24 hpi :No V5 Control             | 0.0334  |
| 8 hpi :Mock Control vs. 24 hpi :Scrambled Control         | 0.9684  |
| 8 hpi :Mock Control vs. 24 hpi :Biotin Control            | >0.9999 |
| 8 hpi :Mock Control vs. 24 hpi :No FISH Control           | 0.0265  |
| 8 hpi :Mock Control vs. 24 hpi :Mock Control              | 0.9124  |
| 12 hpi :NS1 mRNA-L vs. 12 hpi :No Primary Control         | <0.0001 |
| 12 hpi :NS1 mRNA-L vs. 12 hpi :No V5 Control              | <0.0001 |
| 12 hpi :NS1 mRNA-L vs. 12 hpi :Scrambled Control          | <0.0001 |
| 12 hpi :NS1 mRNA-L vs. 12 hpi :Biotin Control             | <0.0001 |
| 12 hpi :NS1 mRNA-L vs. 12 hpi :No FISH Control            | <0.0001 |
| 12 hpi :NS1 mRNA-L vs. 12 hpi :Mock Control               | <0.0001 |
| 12 hpi :NS1 mRNA-L vs. 18 hpi:NS1 mRNA-L                  | <0.0001 |
| 12 hpi :NS1 mRNA-L vs. 18 hpi:No Primary Control          | <0.0001 |
| 12 hpi :NS1 mRNA-L vs. 18 hpi:No V5 Control               | <0.0001 |
| 12 hpi :NS1 mRNA-L vs. 18 hpi:Scrambled Control           | <0.0001 |
| 12 hpi :NS1 mRNA-L vs. 18 hpi:Biotin Control              | <0.0001 |
| 12 hpi :NS1 mRNA-L vs. 18 hpi:No FISH Control             | <0.0001 |
| 12 hpi :NS1 mRNA-L vs. 18 hpi:Mock Control                | <0.0001 |
| 12 hpi :NS1 mRNA-L vs. 24 hpi :NS1 mRNA-L                 | 0.6722  |
| 12 hpi :NS1 mRNA-L vs. 24 hpi :No Primary Control         | <0.0001 |
| 12 hpi :NS1 mRNA-L vs. 24 hpi :No V5 Control              | <0.0001 |
| 12 hpi :NS1 mRNA-L vs. 24 hpi :Scrambled Control          | <0.0001 |
| 12 hpi :NS1 mRNA-L vs. 24 hpi :Biotin Control             | <0.0001 |
| 12 hpi :NS1 mRNA-L vs. 24 hpi :No FISH Control            | <0.0001 |
| 12 hpi :NS1 mRNA-L vs. 24 hpi :Mock Control               | <0.0001 |
| 12 hpi :No Primary Control vs. 12 hpi :No V5 Control      | 0.2722  |
| 12 hpi :No Primary Control vs. 12 hpi :Scrambled Control  | 0.0418  |
| 12 hpi :No Primary Control vs. 12 hpi :Biotin Control     | 0.0074  |
| 12 hpi :No Primary Control vs. 12 hpi :No FISH Control    | 0.0791  |
| 12 hpi :No Primary Control vs. 12 hpi :Mock Control       | <0.0001 |
| 12 hpi :No Primary Control vs. 18 hpi:NS1 mRNA-L          | <0.0001 |
| 12 hpi :No Primary Control vs. 18 hpi:No Primary Control  | >0.9999 |
| 12 hpi :No Primary Control vs. 18 hpi:No V5 Control       | >0.9999 |
| 12 hpi :No Primary Control vs. 18 hpi:Scrambled Control   | 0.2336  |
| 12 hpi :No Primary Control vs. 18 hpi:Biotin Control      | 0.3145  |
| 12 hpi :No Primary Control vs. 18 hpi:No FISH Control     | >0.9999 |
| 12 hpi :No Primary Control vs. 18 hpi:Mock Control        | <0.0001 |
| 12 hpi :No Primary Control vs. 24 hpi :NS1 mRNA-L         | <0.0001 |
| 12 hpi :No Primary Control vs. 24 hpi :No Primary Control | >0.9999 |
| 12 hpi :No Primary Control vs. 24 hpi :No V5 Control      | >0.9999 |
| 12 hpi :No Primary Control vs. 24 hpi :Scrambled Control  | 0.3145  |
| 12 hpi :No Primary Control vs. 24 hpi :Biotin Control     | 0.0127  |
| 12 hpi :No Primary Control vs. 24 hpi :No FISH Control    | >0.9999 |
| 12 hpi :No Primary Control vs. 24 hpi :Mock Control       | 0.46    |
| 12 hpi :No V5 Control vs. 12 hpi :Scrambled Control       | >0.9999 |
| 12 hpi :No V5 Control vs. 12 hpi :Biotin Control          | >0.9999 |
| 12 hpi :No V5 Control vs. 12 hpi :No FISH Control         | >0.9999 |
| 12 hpi :No V5 Control vs. 12 hpi :Mock Control            | <0.0001 |
| 12 hpi :No V5 Control vs. 18 hpi:NS1 mRNA-L               | 0.0011  |
| 12 hpi :No V5 Control vs. 18 hpi:No Primary Control       | 0.5664  |

|                                                          |         |
|----------------------------------------------------------|---------|
| 12 hpi :No V5 Control vs. 18 hpi:No V5 Control           | 0.6722  |
| 12 hpi :No V5 Control vs. 18 hpi:Scrambled Control       | >0.9999 |
| 12 hpi :No V5 Control vs. 18 hpi:Biotin Control          | >0.9999 |
| 12 hpi :No V5 Control vs. 18 hpi:No FISH Control         | 0.8122  |
| 12 hpi :No V5 Control vs. 18 hpi:Mock Control            | 0.8507  |
| 12 hpi :No V5 Control vs. 24 hpi :NS1 mRNA-L             | <0.0001 |
| 12 hpi :No V5 Control vs. 24 hpi :No Primary Control     | 0.9985  |
| 12 hpi :No V5 Control vs. 24 hpi :No V5 Control          | 0.9973  |
| 12 hpi :No V5 Control vs. 24 hpi :Scrambled Control      | >0.9999 |
| 12 hpi :No V5 Control vs. 24 hpi :Biotin Control         | >0.9999 |
| 12 hpi :No V5 Control vs. 24 hpi :No FISH Control        | 0.9951  |
| 12 hpi :No V5 Control vs. 24 hpi :Mock Control           | >0.9999 |
| 12 hpi :Scrambled Control vs. 12 hpi :Biotin Control     | >0.9999 |
| 12 hpi :Scrambled Control vs. 12 hpi :No FISH Control    | >0.9999 |
| 12 hpi :Scrambled Control vs. 12 hpi :Mock Control       | <0.0001 |
| 12 hpi :Scrambled Control vs. 18 hpi:NS1 mRNA-L          | 0.0163  |
| 12 hpi :Scrambled Control vs. 18 hpi:No Primary Control  | 0.1407  |
| 12 hpi :Scrambled Control vs. 18 hpi:No V5 Control       | 0.1989  |
| 12 hpi :Scrambled Control vs. 18 hpi:Scrambled Control   | >0.9999 |
| 12 hpi :Scrambled Control vs. 18 hpi:Biotin Control      | >0.9999 |
| 12 hpi :Scrambled Control vs. 18 hpi:No FISH Control     | 0.3145  |
| 12 hpi :Scrambled Control vs. 18 hpi:Mock Control        | 0.9973  |
| 12 hpi :Scrambled Control vs. 24 hpi :NS1 mRNA-L         | <0.0001 |
| 12 hpi :Scrambled Control vs. 24 hpi :No Primary Control | 0.8841  |
| 12 hpi :Scrambled Control vs. 24 hpi :No V5 Control      | 0.8507  |
| 12 hpi :Scrambled Control vs. 24 hpi :Scrambled Control  | >0.9999 |
| 12 hpi :Scrambled Control vs. 24 hpi :Biotin Control     | >0.9999 |
| 12 hpi :Scrambled Control vs. 24 hpi :No FISH Control    | 0.8122  |
| 12 hpi :Scrambled Control vs. 24 hpi :Mock Control       | >0.9999 |
| 12 hpi :Biotin Control vs. 12 hpi :No FISH Control       | >0.9999 |
| 12 hpi :Biotin Control vs. 12 hpi :Mock Control          | <0.0001 |
| 12 hpi :Biotin Control vs. 18 hpi:NS1 mRNA-L             | 0.1     |
| 12 hpi :Biotin Control vs. 18 hpi:No Primary Control     | 0.0322  |
| 12 hpi :Biotin Control vs. 18 hpi:No V5 Control          | 0.0501  |
| 12 hpi :Biotin Control vs. 18 hpi:Scrambled Control      | >0.9999 |
| 12 hpi :Biotin Control vs. 18 hpi:Biotin Control         | >0.9999 |
| 12 hpi :Biotin Control vs. 18 hpi:No FISH Control        | 0.0929  |
| 12 hpi :Biotin Control vs. 18 hpi:Mock Control           | >0.9999 |
| 12 hpi :Biotin Control vs. 24 hpi :NS1 mRNA-L            | <0.0001 |
| 12 hpi :Biotin Control vs. 24 hpi :No Primary Control    | 0.5503  |
| 12 hpi :Biotin Control vs. 24 hpi :No V5 Control         | 0.4973  |
| 12 hpi :Biotin Control vs. 24 hpi :Scrambled Control     | >0.9999 |
| 12 hpi :Biotin Control vs. 24 hpi :Biotin Control        | >0.9999 |
| 12 hpi :Biotin Control vs. 24 hpi :No FISH Control       | 0.4453  |
| 12 hpi :Biotin Control vs. 24 hpi :Mock Control          | >0.9999 |
| 12 hpi :No FISH Control vs. 12 hpi :Mock Control         | <0.0001 |
| 12 hpi :No FISH Control vs. 18 hpi:NS1 mRNA-L            | 0.0076  |
| 12 hpi :No FISH Control vs. 18 hpi:No Primary Control    | 0.2336  |
| 12 hpi :No FISH Control vs. 18 hpi:No V5 Control         | 0.3145  |
| 12 hpi :No FISH Control vs. 18 hpi:Scrambled Control     | >0.9999 |
| 12 hpi :No FISH Control vs. 18 hpi:Biotin Control        | >0.9999 |
| 12 hpi :No FISH Control vs. 18 hpi:No FISH Control       | 0.46    |
| 12 hpi :No FISH Control vs. 18 hpi:Mock Control          | 0.9866  |
| 12 hpi :No FISH Control vs. 24 hpi :NS1 mRNA-L           | <0.0001 |

|                                                          |         |
|----------------------------------------------------------|---------|
| 12 hpi :No FISH Control vs. 24 hpi :No Primary Control   | 0.9542  |
| 12 hpi :No FISH Control vs. 24 hpi :No V5 Control        | 0.9357  |
| 12 hpi :No FISH Control vs. 24 hpi :Scrambled Control    | >0.9999 |
| 12 hpi :No FISH Control vs. 24 hpi :Biotin Control       | >0.9999 |
| 12 hpi :No FISH Control vs. 24 hpi :No FISH Control      | 0.9124  |
| 12 hpi :No FISH Control vs. 24 hpi :Mock Control         | >0.9999 |
| 12 hpi :Mock Control vs. 18 hpi:NS1 mRNA-L               | 0.0966  |
| 12 hpi :Mock Control vs. 18 hpi:No Primary Control       | <0.0001 |
| 12 hpi :Mock Control vs. 18 hpi:No V5 Control            | <0.0001 |
| 12 hpi :Mock Control vs. 18 hpi:Scrambled Control        | <0.0001 |
| 12 hpi :Mock Control vs. 18 hpi:Biotin Control           | <0.0001 |
| 12 hpi :Mock Control vs. 18 hpi:No FISH Control          | <0.0001 |
| 12 hpi :Mock Control vs. 18 hpi:Mock Control             | <0.0001 |
| 12 hpi :Mock Control vs. 24 hpi :NS1 mRNA-L              | 0.3602  |
| 12 hpi :Mock Control vs. 24 hpi :No Primary Control      | <0.0001 |
| 12 hpi :Mock Control vs. 24 hpi :No V5 Control           | <0.0001 |
| 12 hpi :Mock Control vs. 24 hpi :Scrambled Control       | <0.0001 |
| 12 hpi :Mock Control vs. 24 hpi :Biotin Control          | <0.0001 |
| 12 hpi :Mock Control vs. 24 hpi :No FISH Control         | <0.0001 |
| 12 hpi :Mock Control vs. 24 hpi :Mock Control            | <0.0001 |
| 18 hpi:NS1 mRNA-L vs. 18 hpi:No Primary Control          | <0.0001 |
| 18 hpi:NS1 mRNA-L vs. 18 hpi:No V5 Control               | <0.0001 |
| 18 hpi:NS1 mRNA-L vs. 18 hpi:Scrambled Control           | 0.0014  |
| 18 hpi:NS1 mRNA-L vs. 18 hpi:Biotin Control              | 0.0008  |
| 18 hpi:NS1 mRNA-L vs. 18 hpi:No FISH Control             | <0.0001 |
| 18 hpi:NS1 mRNA-L vs. 18 hpi:Mock Control                | 0.9357  |
| 18 hpi:NS1 mRNA-L vs. 24 hpi :NS1 mRNA-L                 | <0.0001 |
| 18 hpi:NS1 mRNA-L vs. 24 hpi :No Primary Control         | <0.0001 |
| 18 hpi:NS1 mRNA-L vs. 24 hpi :No V5 Control              | <0.0001 |
| 18 hpi:NS1 mRNA-L vs. 24 hpi :Scrambled Control          | 0.0008  |
| 18 hpi:NS1 mRNA-L vs. 24 hpi :Biotin Control             | 0.0521  |
| 18 hpi:NS1 mRNA-L vs. 24 hpi :No FISH Control            | <0.0001 |
| 18 hpi:NS1 mRNA-L vs. 24 hpi :Mock Control               | 0.0003  |
| 18 hpi:No Primary Control vs. 18 hpi:No V5 Control       | >0.9999 |
| 18 hpi:No Primary Control vs. 18 hpi:Scrambled Control   | 0.5128  |
| 18 hpi:No Primary Control vs. 18 hpi:Biotin Control      | 0.6199  |
| 18 hpi:No Primary Control vs. 18 hpi:No FISH Control     | >0.9999 |
| 18 hpi:No Primary Control vs. 18 hpi:Mock Control        | <0.0001 |
| 18 hpi:No Primary Control vs. 24 hpi :NS1 mRNA-L         | <0.0001 |
| 18 hpi:No Primary Control vs. 24 hpi :No Primary Control | >0.9999 |
| 18 hpi:No Primary Control vs. 24 hpi :No V5 Control      | >0.9999 |
| 18 hpi:No Primary Control vs. 24 hpi :Scrambled Control  | 0.6199  |
| 18 hpi:No Primary Control vs. 24 hpi :Biotin Control     | 0.0521  |
| 18 hpi:No Primary Control vs. 24 hpi :No FISH Control    | >0.9999 |
| 18 hpi:No Primary Control vs. 24 hpi :Mock Control       | 0.7692  |
| 18 hpi:No V5 Control vs. 18 hpi:Scrambled Control        | 0.6199  |
| 18 hpi:No V5 Control vs. 18 hpi:Biotin Control           | 0.7223  |
| 18 hpi:No V5 Control vs. 18 hpi:No FISH Control          | >0.9999 |
| 18 hpi:No V5 Control vs. 18 hpi:Mock Control             | 0.0001  |
| 18 hpi:No V5 Control vs. 24 hpi :NS1 mRNA-L              | <0.0001 |
| 18 hpi:No V5 Control vs. 24 hpi :No Primary Control      | >0.9999 |
| 18 hpi:No V5 Control vs. 24 hpi :No V5 Control           | >0.9999 |
| 18 hpi:No V5 Control vs. 24 hpi :Scrambled Control       | 0.7223  |
| 18 hpi:No V5 Control vs. 24 hpi :Biotin Control          | 0.0791  |

|                                                          |         |
|----------------------------------------------------------|---------|
| 18 hpi:No V5 Control vs. 24 hpi :No FISH Control         | >0.9999 |
| 18 hpi:No V5 Control vs. 24 hpi :Mock Control            | 0.8507  |
| 18 hpi:Scrambled Control vs. 18 hpi:Biotin Control       | >0.9999 |
| 18 hpi:Scrambled Control vs. 18 hpi:No FISH Control      | 0.7692  |
| 18 hpi:Scrambled Control vs. 18 hpi:Mock Control         | 0.8841  |
| 18 hpi:Scrambled Control vs. 24 hpi :NS1 mRNA-L          | <0.0001 |
| 18 hpi:Scrambled Control vs. 24 hpi :No Primary Control  | 0.9973  |
| 18 hpi:Scrambled Control vs. 24 hpi :No V5 Control       | 0.9951  |
| 18 hpi:Scrambled Control vs. 24 hpi :Scrambled Control   | >0.9999 |
| 18 hpi:Scrambled Control vs. 24 hpi :Biotin Control      | >0.9999 |
| 18 hpi:Scrambled Control vs. 24 hpi :No FISH Control     | 0.9917  |
| 18 hpi:Scrambled Control vs. 24 hpi :Mock Control        | >0.9999 |
| 18 hpi:Biotin Control vs. 18 hpi:No FISH Control         | 0.8507  |
| 18 hpi:Biotin Control vs. 18 hpi:Mock Control            | 0.8122  |
| 18 hpi:Biotin Control vs. 24 hpi :NS1 mRNA-L             | <0.0001 |
| 18 hpi:Biotin Control vs. 24 hpi :No Primary Control     | 0.9993  |
| 18 hpi:Biotin Control vs. 24 hpi :No V5 Control          | 0.9985  |
| 18 hpi:Biotin Control vs. 24 hpi :Scrambled Control      | >0.9999 |
| 18 hpi:Biotin Control vs. 24 hpi :Biotin Control         | >0.9999 |
| 18 hpi:Biotin Control vs. 24 hpi :No FISH Control        | 0.9973  |
| 18 hpi:Biotin Control vs. 24 hpi :Mock Control           | >0.9999 |
| 18 hpi:No FISH Control vs. 18 hpi:Mock Control           | 0.0003  |
| 18 hpi:No FISH Control vs. 24 hpi :NS1 mRNA-L            | <0.0001 |
| 18 hpi:No FISH Control vs. 24 hpi :No Primary Control    | >0.9999 |
| 18 hpi:No FISH Control vs. 24 hpi :No V5 Control         | >0.9999 |
| 18 hpi:No FISH Control vs. 24 hpi :Scrambled Control     | 0.8507  |
| 18 hpi:No FISH Control vs. 24 hpi :Biotin Control        | 0.1407  |
| 18 hpi:No FISH Control vs. 24 hpi :No FISH Control       | >0.9999 |
| 18 hpi:No FISH Control vs. 24 hpi :Mock Control          | 0.9357  |
| 18 hpi:Mock Control vs. 24 hpi :NS1 mRNA-L               | <0.0001 |
| 18 hpi:Mock Control vs. 24 hpi :No Primary Control       | 0.0099  |
| 18 hpi:Mock Control vs. 24 hpi :No V5 Control            | 0.0076  |
| 18 hpi:Mock Control vs. 24 hpi :Scrambled Control        | 0.8122  |
| 18 hpi:Mock Control vs. 24 hpi :Biotin Control           | >0.9999 |
| 18 hpi:Mock Control vs. 24 hpi :No FISH Control          | 0.0058  |
| 18 hpi:Mock Control vs. 24 hpi :Mock Control             | 0.6722  |
| 24 hpi :NS1 mRNA-L vs. 24 hpi :No Primary Control        | <0.0001 |
| 24 hpi :NS1 mRNA-L vs. 24 hpi :No V5 Control             | <0.0001 |
| 24 hpi :NS1 mRNA-L vs. 24 hpi :Scrambled Control         | <0.0001 |
| 24 hpi :NS1 mRNA-L vs. 24 hpi :Biotin Control            | <0.0001 |
| 24 hpi :NS1 mRNA-L vs. 24 hpi :No FISH Control           | <0.0001 |
| 24 hpi :NS1 mRNA-L vs. 24 hpi :Mock Control              | <0.0001 |
| 24 hpi :No Primary Control vs. 24 hpi :No V5 Control     | >0.9999 |
| 24 hpi :No Primary Control vs. 24 hpi :Scrambled Control | 0.9993  |
| 24 hpi :No Primary Control vs. 24 hpi :Biotin Control    | 0.6722  |
| 24 hpi :No Primary Control vs. 24 hpi :No FISH Control   | >0.9999 |
| 24 hpi :No Primary Control vs. 24 hpi :Mock Control      | >0.9999 |
| 24 hpi :No V5 Control vs. 24 hpi :Scrambled Control      | 0.9985  |
| 24 hpi :No V5 Control vs. 24 hpi :Biotin Control         | 0.6199  |
| 24 hpi :No V5 Control vs. 24 hpi :No FISH Control        | >0.9999 |
| 24 hpi :No V5 Control vs. 24 hpi :Mock Control           | 0.9998  |
| 24 hpi :Scrambled Control vs. 24 hpi :Biotin Control     | >0.9999 |
| 24 hpi :Scrambled Control vs. 24 hpi :No FISH Control    | 0.9973  |
| 24 hpi :Scrambled Control vs. 24 hpi :Mock Control       | >0.9999 |

|                                                    |                                 |
|----------------------------------------------------|---------------------------------|
| 24 hpi :Biotin Control vs. 24 hpi :No FISH Control | 0.5664                          |
| 24 hpi :Biotin Control vs. 24 hpi :Mock Control    | >0.9999                         |
| 24 hpi :No FISH Control vs. 24 hpi :Mock Control   | 0.9996                          |
|                                                    |                                 |
|                                                    |                                 |
| <b>Graph Title</b>                                 | NS1 mRNA-L PLA (Normalized PLA) |
| <b>Comparison</b>                                  | <b>P Value</b>                  |
| 6 hpi                                              |                                 |
| NS1 mRNA-L vs. No Primary Control                  | <0.0001                         |
| NS1 mRNA-L vs. No V5 Control                       | <0.0001                         |
| NS1 mRNA-L vs. Scrambled Control                   | <0.0001                         |
| NS1 mRNA-L vs. Biotin Control                      | <0.0001                         |
| NS1 mRNA-L vs. No FISH Control                     | <0.0001                         |
| No Primary Control vs. No V5 Control               | 0.7602                          |
| No Primary Control vs. Scrambled Control           | >0.9999                         |
| No Primary Control vs. Biotin Control              | 0.9952                          |
| No Primary Control vs. No FISH Control             | 0.9557                          |
| No V5 Control vs. Scrambled Control                | 0.7358                          |
| No V5 Control vs. Biotin Control                   | 0.9638                          |
| No V5 Control vs. No FISH Control                  | 0.2367                          |
| Scrambled Control vs. Biotin Control               | 0.9932                          |
| Scrambled Control vs. No FISH Control              | 0.9641                          |
| Biotin Control vs. No FISH Control                 | 0.7368                          |
| 8 hpi                                              |                                 |
| NS1 mRNA-L vs. No Primary Control                  | 0.2007                          |
| NS1 mRNA-L vs. No V5 Control                       | 0.5055                          |
| NS1 mRNA-L vs. Scrambled Control                   | 0.0006                          |
| NS1 mRNA-L vs. Biotin Control                      | 0.0362                          |
| NS1 mRNA-L vs. No FISH Control                     | 0.0054                          |
| No Primary Control vs. No V5 Control               | 0.9942                          |
| No Primary Control vs. Scrambled Control           | 0.447                           |
| No Primary Control vs. Biotin Control              | 0.9839                          |
| No Primary Control vs. No FISH Control             | 0.8028                          |
| No V5 Control vs. Scrambled Control                | 0.1658                          |
| No V5 Control vs. Biotin Control                   | 0.823                           |
| No V5 Control vs. No FISH Control                  | 0.4574                          |
| Scrambled Control vs. Biotin Control               | 0.8612                          |
| Scrambled Control vs. No FISH Control              | 0.9934                          |
| Biotin Control vs. No FISH Control                 | 0.992                           |
| 12 hpi                                             |                                 |
| NS1 mRNA-L vs. No Primary Control                  | <0.0001                         |
| NS1 mRNA-L vs. No V5 Control                       | 0.4994                          |
| NS1 mRNA-L vs. Scrambled Control                   | 0.6493                          |
| NS1 mRNA-L vs. Biotin Control                      | 0.9568                          |
| NS1 mRNA-L vs. No FISH Control                     | <0.0001                         |
| No Primary Control vs. No V5 Control               | 0.0058                          |
| No Primary Control vs. Scrambled Control           | 0.0025                          |
| No Primary Control vs. Biotin Control              | 0.0002                          |
| No Primary Control vs. No FISH Control             | 0.9955                          |
| No V5 Control vs. Scrambled Control                | >0.9999                         |
| No V5 Control vs. Biotin Control                   | 0.9479                          |
| No V5 Control vs. No FISH Control                  | 0.0316                          |
| Scrambled Control vs. Biotin Control               | 0.9853                          |
| Scrambled Control vs. No FISH Control              | 0.0156                          |

|                                          |         |
|------------------------------------------|---------|
| Biotin Control vs. No FISH Control       | 0.0014  |
| 18 hpi                                   |         |
| NS1 mRNA-L vs. No Primary Control        | 0.7854  |
| NS1 mRNA-L vs. No V5 Control             | 0.8917  |
| NS1 mRNA-L vs. Scrambled Control         | 0.9206  |
| NS1 mRNA-L vs. Biotin Control            | 0.8474  |
| NS1 mRNA-L vs. No FISH Control           | 0.9138  |
| No Primary Control vs. No V5 Control     | >0.9999 |
| No Primary Control vs. Scrambled Control | 0.9996  |
| No Primary Control vs. Biotin Control    | >0.9999 |
| No Primary Control vs. No FISH Control   | 0.9997  |
| No V5 Control vs. Scrambled Control      | >0.9999 |
| No V5 Control vs. Biotin Control         | >0.9999 |
| No V5 Control vs. No FISH Control        | >0.9999 |
| Scrambled Control vs. Biotin Control     | >0.9999 |
| Scrambled Control vs. No FISH Control    | >0.9999 |
| Biotin Control vs. No FISH Control       | >0.9999 |
| 24 hpi                                   |         |
| NS1 mRNA-L vs. No Primary Control        | 0.5273  |
| NS1 mRNA-L vs. No V5 Control             | 0.4757  |
| NS1 mRNA-L vs. Scrambled Control         | 0.9993  |
| NS1 mRNA-L vs. Biotin Control            | 0.9107  |
| NS1 mRNA-L vs. No FISH Control           | 0.9649  |
| No Primary Control vs. No V5 Control     | >0.9999 |
| No Primary Control vs. Scrambled Control | 0.7545  |
| No Primary Control vs. Biotin Control    | 0.0707  |
| No Primary Control vs. No FISH Control   | 0.9483  |
| No V5 Control vs. Scrambled Control      | 0.7073  |
| No V5 Control vs. Biotin Control         | 0.0572  |
| No V5 Control vs. No FISH Control        | 0.9271  |
| Scrambled Control vs. Biotin Control     | 0.7421  |
| Scrambled Control vs. No FISH Control    | 0.9974  |
| Biotin Control vs. No FISH Control       | 0.4428  |

| Figure S7D                               |                             |
|------------------------------------------|-----------------------------|
| Graph Title                              | Poly(A)-L PLA (# of Puncta) |
| Comparison                               | P Value                     |
| 6 hpi                                    |                             |
| PolyA-L vs. No Primary Control           | 0.001                       |
| PolyA-L vs. No V5 Control                | <0.0001                     |
| PolyA-L vs. Scrambled Control            | 0.0029                      |
| PolyA-L vs. Biotin Control               | 0.0078                      |
| PolyA-L vs. No FISH Control              | <0.0001                     |
| PolyA-L vs. Mock Control                 | 0.061                       |
| No Primary Control vs. No V5 Control     | 0.9922                      |
| No Primary Control vs. Scrambled Control | >0.9999                     |
| No Primary Control vs. Biotin Control    | 0.9984                      |
| No Primary Control vs. No FISH Control   | 0.7441                      |
| No Primary Control vs. Mock Control      | 0.9141                      |
| No V5 Control vs. Scrambled Control      | 0.96                        |
| No V5 Control vs. Biotin Control         | 0.8798                      |
| No V5 Control vs. No FISH Control        | 0.9855                      |
| No V5 Control vs. Mock Control           | 0.5178                      |
| Scrambled Control vs. Biotin Control     | >0.9999                     |

|                                          |         |
|------------------------------------------|---------|
| Scrambled Control vs. No FISH Control    | 0.5713  |
| Scrambled Control vs. Mock Control       | 0.9753  |
| Biotin Control vs. No FISH Control       | 0.3954  |
| Biotin Control vs. Mock Control          | 0.9962  |
| No FISH Control vs. Mock Control         | 0.1172  |
| 8 hpi                                    |         |
| PolyA-L vs. No Primary Control           | 0.0144  |
| PolyA-L vs. No V5 Control                | 0.0255  |
| PolyA-L vs. Scrambled Control            | 0.0144  |
| PolyA-L vs. Biotin Control               | 0.3418  |
| PolyA-L vs. No FISH Control              | 0.0714  |
| PolyA-L vs. Mock Control                 | 0.0714  |
| No Primary Control vs. No V5 Control     | >0.9999 |
| No Primary Control vs. Scrambled Control | >0.9999 |
| No Primary Control vs. Biotin Control    | 0.8798  |
| No Primary Control vs. No FISH Control   | 0.9984  |
| No Primary Control vs. Mock Control      | 0.9984  |
| No V5 Control vs. Scrambled Control      | >0.9999 |
| No V5 Control vs. Biotin Control         | 0.9395  |
| No V5 Control vs. No FISH Control        | 0.9998  |
| No V5 Control vs. Mock Control           | 0.9998  |
| Scrambled Control vs. Biotin Control     | 0.8798  |
| Scrambled Control vs. No FISH Control    | 0.9984  |
| Scrambled Control vs. Mock Control       | 0.9984  |
| Biotin Control vs. No FISH Control       | 0.9922  |
| Biotin Control vs. Mock Control          | 0.9922  |
| No FISH Control vs. Mock Control         | >0.9999 |
| 12 hpi                                   |         |
| PolyA-L vs. No Primary Control           | <0.0001 |
| PolyA-L vs. No V5 Control                | <0.0001 |
| PolyA-L vs. Scrambled Control            | <0.0001 |
| PolyA-L vs. Biotin Control               | <0.0001 |
| PolyA-L vs. No FISH Control              | <0.0001 |
| PolyA-L vs. Mock Control                 | <0.0001 |
| No Primary Control vs. No V5 Control     | 0.9129  |
| No Primary Control vs. Scrambled Control | 0.1392  |
| No Primary Control vs. Biotin Control    | 0.0229  |
| No Primary Control vs. No FISH Control   | 0.2467  |
| No Primary Control vs. Mock Control      | 0.0028  |
| No V5 Control vs. Scrambled Control      | 0.7949  |
| No V5 Control vs. Biotin Control         | 0.3688  |
| No V5 Control vs. No FISH Control        | 0.9129  |
| No V5 Control vs. Mock Control           | 0.105   |
| Scrambled Control vs. Biotin Control     | 0.994   |
| Scrambled Control vs. No FISH Control    | >0.9999 |
| Scrambled Control vs. Mock Control       | 0.857   |
| Biotin Control vs. No FISH Control       | 0.9667  |
| Biotin Control vs. Mock Control          | 0.9963  |
| No FISH Control vs. Mock Control         | 0.7145  |
| 18 hpi                                   |         |
| PolyA-L vs. No Primary Control           | <0.0001 |
| PolyA-L vs. No V5 Control                | <0.0001 |
| PolyA-L vs. Scrambled Control            | 0.0274  |
| PolyA-L vs. Biotin Control               | 0.0435  |



|                                          |                                |
|------------------------------------------|--------------------------------|
| PolyA-L vs. No FISH Control              | <0.0001                        |
| PolyA-L vs. Mock Control                 | <0.0001                        |
| No Primary Control vs. No V5 Control     | 0.9751                         |
| No Primary Control vs. Scrambled Control | 0.0119                         |
| No Primary Control vs. Biotin Control    | 0.0057                         |
| No Primary Control vs. No FISH Control   | >0.9999                        |
| No Primary Control vs. Mock Control      | 0.8798                         |
| No V5 Control vs. Scrambled Control      | 0.1475                         |
| No V5 Control vs. Biotin Control         | 0.0901                         |
| No V5 Control vs. No FISH Control        | 0.9962                         |
| No V5 Control vs. Mock Control           | 0.9998                         |
| Scrambled Control vs. Biotin Control     | >0.9999                        |
| Scrambled Control vs. No FISH Control    | 0.028                          |
| Scrambled Control vs. Mock Control       | 0.3039                         |
| Biotin Control vs. No FISH Control       | 0.0144                         |
| Biotin Control vs. Mock Control          | 0.2061                         |
| No FISH Control vs. Mock Control         | 0.96                           |
| 24 hpi                                   |                                |
| PolyA-L vs. No Primary Control           | <0.0001                        |
| PolyA-L vs. No V5 Control                | <0.0001                        |
| PolyA-L vs. Scrambled Control            | 0.0015                         |
| PolyA-L vs. Biotin Control               | 0.0403                         |
| PolyA-L vs. No FISH Control              | <0.0001                        |
| PolyA-L vs. Mock Control                 | <0.0001                        |
| No Primary Control vs. No V5 Control     | 0.9962                         |
| No Primary Control vs. Scrambled Control | 0.0334                         |
| No Primary Control vs. Biotin Control    | 0.0015                         |
| No Primary Control vs. No FISH Control   | 0.9984                         |
| No Primary Control vs. Mock Control      | 0.9855                         |
| No V5 Control vs. Scrambled Control      | 0.1703                         |
| No V5 Control vs. Biotin Control         | 0.014                          |
| No V5 Control vs. No FISH Control        | >0.9999                        |
| No V5 Control vs. Mock Control           | >0.9999                        |
| Scrambled Control vs. Biotin Control     | 0.9707                         |
| Scrambled Control vs. No FISH Control    | 0.1392                         |
| Scrambled Control vs. Mock Control       | 0.2467                         |
| Biotin Control vs. No FISH Control       | 0.0104                         |
| Biotin Control vs. Mock Control          | 0.0247                         |
| No FISH Control vs. Mock Control         | >0.9999                        |
| <b>Graph Title</b>                       | Poly(A)-L PLA (Normalized PLA) |
| <b>Comparison</b>                        | <b>P Value</b>                 |
| 6 hpi                                    |                                |
| poly(A)-L vs. No Primary Control         | 0.0011                         |
| poly(A)-L vs. No V5 Control              | <0.0001                        |
| poly(A)-L vs. Scrambled Control          | <0.0001                        |
| poly(A)-L vs. Biotin Control             | 0.0002                         |
| poly(A)-L vs. No FISH Control            | <0.0001                        |
| No Primary Control vs. No V5 Control     | 0.6882                         |
| No Primary Control vs. Scrambled Control | 0.9406                         |
| No Primary Control vs. Biotin Control    | 0.999                          |
| No Primary Control vs. No FISH Control   | 0.5261                         |
| No V5 Control vs. Scrambled Control      | 0.9943                         |
| No V5 Control vs. Biotin Control         | 0.885                          |
| No V5 Control vs. No FISH Control        | 0.9999                         |

|                                          |         |
|------------------------------------------|---------|
| Scrambled Control vs. Biotin Control     | 0.9942  |
| Scrambled Control vs. No FISH Control    | 0.9688  |
| Biotin Control vs. No FISH Control       | 0.7629  |
| 8 hpi                                    |         |
| poly(A)-L vs. No Primary Control         | 0.6621  |
| poly(A)-L vs. No V5 Control              | 0.6031  |
| poly(A)-L vs. Scrambled Control          | 0.2549  |
| poly(A)-L vs. Biotin Control             | 0.8988  |
| poly(A)-L vs. No FISH Control            | 0.5844  |
| No Primary Control vs. No V5 Control     | >0.9999 |
| No Primary Control vs. Scrambled Control | 0.9859  |
| No Primary Control vs. Biotin Control    | 0.9977  |
| No Primary Control vs. No FISH Control   | >0.9999 |
| No V5 Control vs. Scrambled Control      | 0.9928  |
| No V5 Control vs. Biotin Control         | 0.9946  |
| No V5 Control vs. No FISH Control        | >0.9999 |
| Scrambled Control vs. Biotin Control     | 0.877   |
| Scrambled Control vs. No FISH Control    | 0.9943  |
| Biotin Control vs. No FISH Control       | 0.9931  |
| 12 hpi                                   |         |
| poly(A)-L vs. No Primary Control         | 0.5478  |
| poly(A)-L vs. No V5 Control              | 0.024   |
| poly(A)-L vs. Scrambled Control          | 0.8256  |
| poly(A)-L vs. Biotin Control             | 0.4215  |
| poly(A)-L vs. No FISH Control            | 0.3942  |
| No Primary Control vs. No V5 Control     | <0.0001 |
| No Primary Control vs. Scrambled Control | 0.0442  |
| No Primary Control vs. Biotin Control    | 0.0055  |
| No Primary Control vs. No FISH Control   | 0.9999  |
| No V5 Control vs. Scrambled Control      | 0.4142  |
| No V5 Control vs. Biotin Control         | 0.8197  |
| No V5 Control vs. No FISH Control        | <0.0001 |
| Scrambled Control vs. Biotin Control     | 0.9874  |
| Scrambled Control vs. No FISH Control    | 0.0217  |
| Biotin Control vs. No FISH Control       | 0.0023  |
| 18 hpi                                   |         |
| poly(A)-L vs. No Primary Control         | 0.9727  |
| poly(A)-L vs. No V5 Control              | 0.9948  |
| poly(A)-L vs. Scrambled Control          | 0.9966  |
| poly(A)-L vs. Biotin Control             | 0.9854  |
| poly(A)-L vs. No FISH Control            | 0.9959  |
| No Primary Control vs. No V5 Control     | >0.9999 |
| No Primary Control vs. Scrambled Control | 0.9998  |
| No Primary Control vs. Biotin Control    | >0.9999 |
| No Primary Control vs. No FISH Control   | 0.9998  |
| No V5 Control vs. Scrambled Control      | >0.9999 |
| No V5 Control vs. Biotin Control         | >0.9999 |
| No V5 Control vs. No FISH Control        | >0.9999 |
| Scrambled Control vs. Biotin Control     | >0.9999 |
| Scrambled Control vs. No FISH Control    | >0.9999 |
| Biotin Control vs. No FISH Control       | >0.9999 |
| 24 hpi                                   |         |
| poly(A)-L vs. No Primary Control         | >0.9999 |
| poly(A)-L vs. No V5 Control              | 0.9987  |

|                                          |        |
|------------------------------------------|--------|
| poly(A)-L vs. Scrambled Control          | 0.9249 |
| poly(A)-L vs. Biotin Control             | 0.1914 |
| poly(A)-L vs. No FISH Control            | 0.9949 |
| No Primary Control vs. No V5 Control     | 0.9996 |
| No Primary Control vs. Scrambled Control | 0.8932 |
| No Primary Control vs. Biotin Control    | 0.157  |
| No Primary Control vs. No FISH Control   | 0.9893 |
| No V5 Control vs. Scrambled Control      | 0.7412 |
| No V5 Control vs. Biotin Control         | 0.0748 |
| No V5 Control vs. No FISH Control        | 0.9388 |
| Scrambled Control vs. Biotin Control     | 0.7678 |
| Scrambled Control vs. No FISH Control    | 0.9978 |
| Biotin Control vs. No FISH Control       | 0.4809 |

| Figure S7E  |                     |
|-------------|---------------------|
| Graph Title | NS1 mRNA vs Poly(A) |
| Comparison  | P Value             |
| 6 hpi       | >0.9999             |
| 8 hpi       | 0.3876              |
| 12 hpi      | 0.0637              |
| 18 hpi      | 0.9956              |
| 24 hpi      | 0.7162              |

| Figure S8C                                    |              |
|-----------------------------------------------|--------------|
| Graph Title                                   | Plaque Assay |
| Comparison                                    | P Value      |
| M2-2-Myc mRNA:200 ng vs. M2-2-Myc mRNA:100 ng | 0.7709       |
| M2-2-Myc mRNA:200 ng vs. M2-2-Myc mRNA:50 ng  | 0.1574       |
| M2-2-Myc mRNA:200 ng vs. M2-2-Myc mRNA:0 ng   | <0.0001      |
| M2-2-Myc mRNA:200 ng vs. M2-1-HA mRNA:200 ng  | <0.0001      |
| M2-2-Myc mRNA:200 ng vs. M2-1-HA mRNA:100 ng  | <0.0001      |
| M2-2-Myc mRNA:200 ng vs. M2-1-HA mRNA:50 ng   | <0.0001      |
| M2-2-Myc mRNA:200 ng vs. M2-1-HA mRNA:0 ng    | <0.0001      |
| M2-2-Myc mRNA:100 ng vs. M2-2-Myc mRNA:50 ng  | 0.9274       |
| M2-2-Myc mRNA:100 ng vs. M2-2-Myc mRNA:0 ng   | 0.0012       |
| M2-2-Myc mRNA:100 ng vs. M2-1-HA mRNA:200 ng  | 0.0017       |
| M2-2-Myc mRNA:100 ng vs. M2-1-HA mRNA:100 ng  | 0.0001       |
| M2-2-Myc mRNA:100 ng vs. M2-1-HA mRNA:50 ng   | <0.0001      |
| M2-2-Myc mRNA:100 ng vs. M2-1-HA mRNA:0 ng    | 0.0012       |
| M2-2-Myc mRNA:50 ng vs. M2-2-Myc mRNA:0 ng    | 0.0209       |
| M2-2-Myc mRNA:50 ng vs. M2-1-HA mRNA:200 ng   | 0.0285       |
| M2-2-Myc mRNA:50 ng vs. M2-1-HA mRNA:100 ng   | 0.0021       |
| M2-2-Myc mRNA:50 ng vs. M2-1-HA mRNA:50 ng    | 0.0002       |
| M2-2-Myc mRNA:50 ng vs. M2-1-HA mRNA:0 ng     | 0.0209       |
| M2-2-Myc mRNA:0 ng vs. M2-1-HA mRNA:200 ng    | >0.9999      |
| M2-2-Myc mRNA:0 ng vs. M2-1-HA mRNA:100 ng    | 0.9759       |
| M2-2-Myc mRNA:0 ng vs. M2-1-HA mRNA:50 ng     | 0.5227       |
| M2-2-Myc mRNA:0 ng vs. M2-1-HA mRNA:0 ng      | >0.9999      |
| M2-1-HA mRNA:200 ng vs. M2-1-HA mRNA:100 ng   | 0.9512       |
| M2-1-HA mRNA:200 ng vs. M2-1-HA mRNA:50 ng    | 0.4404       |
| M2-1-HA mRNA:200 ng vs. M2-1-HA mRNA:0 ng     | >0.9999      |
| M2-1-HA mRNA:100 ng vs. M2-1-HA mRNA:50 ng    | 0.969        |
| M2-1-HA mRNA:100 ng vs. M2-1-HA mRNA:0 ng     | 0.9759       |

|                                          |                       |
|------------------------------------------|-----------------------|
| M2-1-HA mRNA:50 ng vs. M2-1-HA mRNA:0 ng | 0.5227                |
| <b>Figure S8A</b>                        |                       |
| <b>Graph Title</b>                       | Veros vs A549s dSTORM |
| <b>Comparison</b>                        | <b>P Value</b>        |
| Veros:6 hpi vs. Veros:8 hpi              | 0.0005                |
| Veros:6 hpi vs. A549s:6 hpi              | 0.759                 |
| Veros:6 hpi vs. A549s:8 hpi              | <0.0001               |
| Veros:8 hpi vs. A549s:6 hpi              | 0.3416                |
| Veros:8 hpi vs. A549s:8 hpi              | 0.1551                |
| A549s:6 hpi vs. A549s:8 hpi              | 0.0163                |

|                    |                |
|--------------------|----------------|
| <b>Figure S8D</b>  |                |
| <b>Graph Title</b> | qRT-PCR        |
| <b>Comparison</b>  | <b>P Value</b> |
| 6:M2-2 vs. 6:GFP   | 0.5399         |
| 6:M2-2 vs. 6:L2K   | 0.6113         |
| 6:M2-2 vs. 8:M2-2  | 0.2516         |
| 6:M2-2 vs. 8:GFP   | 0.5944         |
| 6:M2-2 vs. 8:L2K   | 0.5472         |
| 6:M2-2 vs. 12:M2-2 | 0.0942         |
| 6:M2-2 vs. 12:GFP  | 0.0007         |
| 6:M2-2 vs. 12:L2K  | 0.0002         |
| 6:GFP vs. 6:L2K    | >0.9999        |
| 6:GFP vs. 8:M2-2   | 0.998          |
| 6:GFP vs. 8:GFP    | >0.9999        |
| 6:GFP vs. 8:L2K    | >0.9999        |
| 6:GFP vs. 12:M2-2  | 0.0063         |
| 6:GFP vs. 12:GFP   | <0.0001        |
| 6:GFP vs. 12:L2K   | <0.0001        |
| 6:L2K vs. 8:M2-2   | 0.9933         |
| 6:L2K vs. 8:GFP    | >0.9999        |
| 6:L2K vs. 8:L2K    | >0.9999        |
| 6:L2K vs. 12:M2-2  | 0.0074         |
| 6:L2K vs. 12:GFP   | 0.0001         |
| 6:L2K vs. 12:L2K   | <0.0001        |
| 8:M2-2 vs. 8:GFP   | 0.9948         |
| 8:M2-2 vs. 8:L2K   | 0.9977         |
| 8:M2-2 vs. 12:M2-2 | 0.0028         |
| 8:M2-2 vs. 12:GFP  | <0.0001        |
| 8:M2-2 vs. 12:L2K  | <0.0001        |
| 8:GFP vs. 8:L2K    | >0.9999        |
| 8:GFP vs. 12:M2-2  | 0.0071         |
| 8:GFP vs. 12:GFP   | 0.0001         |
| 8:GFP vs. 12:L2K   | <0.0001        |
| 8:L2K vs. 12:M2-2  | 0.0064         |
| 8:L2K vs. 12:GFP   | <0.0001        |
| 8:L2K vs. 12:L2K   | <0.0001        |
| 12:M2-2 vs. 12:GFP | 0.0414         |
| 12:M2-2 vs. 12:L2K | 0.0077         |
| 12:GFP vs. 12:L2K  | 0.9101         |

**Figure S9C**

| Graph Title                                  | RSV genome-L PLA (# of Puncta) |
|----------------------------------------------|--------------------------------|
| Comparison                                   | P Value                        |
| M2-2 Myc mRNA 6 hpi                          |                                |
| RSVg-L vs. No Primary Control                | <0.0001                        |
| RSVg-L vs. No V5 Control                     | 0.001                          |
| RSVg-L vs. Scrambled Control                 | 0.0039                         |
| RSVg-L vs. Biotin Control                    | 0.0055                         |
| RSVg-L vs. No FISH Control                   | 0.0071                         |
| RSVg-L vs. Mock Infected Control             | 0.9979                         |
| No Primary Control vs. No V5 Control         | 0.9194                         |
| No Primary Control vs. Scrambled Control     | <0.0001                        |
| No Primary Control vs. Biotin Control        | <0.0001                        |
| No Primary Control vs. No FISH Control       | 0.6662                         |
| No Primary Control vs. Mock Infected Control | <0.0001                        |
| No V5 Control vs. Scrambled Control          | <0.0001                        |
| No V5 Control vs. Biotin Control             | <0.0001                        |
| No V5 Control vs. No FISH Control            | 0.9988                         |
| No V5 Control vs. Mock Infected Control      | 0.0087                         |
| Scrambled Control vs. Biotin Control         | >0.9999                        |
| Scrambled Control vs. No FISH Control        | <0.0001                        |
| Scrambled Control vs. Mock Infected Control  | 0.0004                         |
| Biotin Control vs. No FISH Control           | <0.0001                        |
| Biotin Control vs. Mock Infected Control     | 0.0006                         |
| No FISH Control vs. Mock Infected Control    | 0.0433                         |
| M2-2 Myc mRNA 8 hpi                          |                                |
| RSVg-L vs. No Primary Control                | <0.0001                        |
| RSVg-L vs. No V5 Control                     | 0.6271                         |
| RSVg-L vs. Scrambled Control                 | 0.6271                         |
| RSVg-L vs. Biotin Control                    | 0.3397                         |
| RSVg-L vs. No FISH Control                   | <0.0001                        |
| RSVg-L vs. Mock Infected Control             | 0.9348                         |
| No Primary Control vs. No V5 Control         | <0.0001                        |
| No Primary Control vs. Scrambled Control     | <0.0001                        |
| No Primary Control vs. Biotin Control        | 0.0003                         |
| No Primary Control vs. No FISH Control       | 0.9993                         |
| No Primary Control vs. Mock Infected Control | <0.0001                        |
| No V5 Control vs. Scrambled Control          | >0.9999                        |
| No V5 Control vs. Biotin Control             | 0.0025                         |
| No V5 Control vs. No FISH Control            | <0.0001                        |
| No V5 Control vs. Mock Infected Control      | 0.9964                         |
| Scrambled Control vs. Biotin Control         | 0.0025                         |
| Scrambled Control vs. No FISH Control        | <0.0001                        |
| Scrambled Control vs. Mock Infected Control  | 0.9964                         |
| Biotin Control vs. No FISH Control           | 0.002                          |
| Biotin Control vs. Mock Infected Control     | 0.022                          |
| No FISH Control vs. Mock Infected Control    | <0.0001                        |
| M2-1 HA mRNA 6 hpi                           |                                |
| RSVg-L vs. No Primary Control                | <0.0001                        |
| RSVg-L vs. No V5 Control                     | <0.0001                        |
| RSVg-L vs. Scrambled Control                 | 0.0105                         |
| RSVg-L vs. Biotin Control                    | <0.0001                        |
| RSVg-L vs. No FISH Control                   | <0.0001                        |
| RSVg-L vs. Mock Infected Control             | <0.0001                        |
| No Primary Control vs. No V5 Control         | 0.6734                         |

|                                              |         |
|----------------------------------------------|---------|
| No Primary Control vs. Scrambled Control     | <0.0001 |
| No Primary Control vs. Biotin Control        | 0.0071  |
| No Primary Control vs. No FISH Control       | 0.2275  |
| No Primary Control vs. Mock Infected Control | 0.0031  |
| No V5 Control vs. Scrambled Control          | <0.0001 |
| No V5 Control vs. Biotin Control             | 0.4492  |
| No V5 Control vs. No FISH Control            | 0.9912  |
| No V5 Control vs. Mock Infected Control      | 0.3128  |
| Scrambled Control vs. Biotin Control         | 0.022   |
| Scrambled Control vs. No FISH Control        | 0.0002  |
| Scrambled Control vs. Mock Infected Control  | 0.0433  |
| Biotin Control vs. No FISH Control           | 0.8847  |
| Biotin Control vs. Mock Infected Control     | >0.9999 |
| No FISH Control vs. Mock Infected Control    | 0.7759  |
| M2-1 HA mRNA 8 hpi                           |         |
| RSVg-L vs. No Primary Control                | <0.0001 |
| RSVg-L vs. No V5 Control                     | <0.0001 |
| RSVg-L vs. Scrambled Control                 | <0.0001 |
| RSVg-L vs. Biotin Control                    | <0.0001 |
| RSVg-L vs. No FISH Control                   | <0.0001 |
| RSVg-L vs. Mock Infected Control             | <0.0001 |
| No Primary Control vs. No V5 Control         | 0.9994  |
| No Primary Control vs. Scrambled Control     | 0.5614  |
| No Primary Control vs. Biotin Control        | 0.0016  |
| No Primary Control vs. No FISH Control       | 0.835   |
| No Primary Control vs. Mock Infected Control | <0.0001 |
| No V5 Control vs. Scrambled Control          | 0.835   |
| No V5 Control vs. Biotin Control             | 0.0087  |
| No V5 Control vs. No FISH Control            | 0.974   |
| No V5 Control vs. Mock Infected Control      | 0.0001  |
| Scrambled Control vs. Biotin Control         | 0.3128  |
| Scrambled Control vs. No FISH Control        | 0.9994  |
| Scrambled Control vs. Mock Infected Control  | 0.022   |
| Biotin Control vs. No FISH Control           | 0.1225  |
| Biotin Control vs. Mock Infected Control     | 0.9401  |
| No FISH Control vs. Mock Infected Control    | 0.0048  |
| <b>Graph Title</b>                           |         |
| RSV genome-L PLA (Normalized PLA)            |         |
| <b>Comparison</b>                            |         |
| P Value                                      |         |
| M2-2 Myc mRNA 6 hpi                          |         |
| RSVg-L vs. No Primary Control                | 0.1579  |
| RSVg-L vs. No V5 Control                     | 0.2997  |
| RSVg-L vs. Scrambled Control                 | 0.2434  |
| RSVg-L vs. Biotin Control                    | 0.0937  |
| RSVg-L vs. No FISH Control                   | 0.1391  |
| No Primary Control vs. No V5 Control         | 0.9994  |
| No Primary Control vs. Scrambled Control     | <0.0001 |
| No Primary Control vs. Biotin Control        | <0.0001 |
| No Primary Control vs. No FISH Control       | >0.9999 |
| No V5 Control vs. Scrambled Control          | 0.0003  |
| No V5 Control vs. Biotin Control             | <0.0001 |
| No V5 Control vs. No FISH Control            | 0.999   |
| Scrambled Control vs. Biotin Control         | 0.9981  |
| Scrambled Control vs. No FISH Control        | <0.0001 |

|                                          |                              |
|------------------------------------------|------------------------------|
| Biotin Control vs. No FISH Control       | <0.0001                      |
| M2-2 Myc mRNA 8 hpi                      |                              |
| RSVg-L vs. No Primary Control            | 0.0637                       |
| RSVg-L vs. No V5 Control                 | 0.83                         |
| RSVg-L vs. Scrambled Control             | 0.4367                       |
| RSVg-L vs. Biotin Control                | >0.9999                      |
| RSVg-L vs. No FISH Control               | 0.8429                       |
| No Primary Control vs. No V5 Control     | 0.001                        |
| No Primary Control vs. Scrambled Control | <0.0001                      |
| No Primary Control vs. Biotin Control    | 0.089                        |
| No Primary Control vs. No FISH Control   | 0.5952                       |
| No V5 Control vs. Scrambled Control      | 0.9881                       |
| No V5 Control vs. Biotin Control         | 0.7406                       |
| No V5 Control vs. No FISH Control        | 0.15                         |
| Scrambled Control vs. Biotin Control     | 0.3347                       |
| Scrambled Control vs. No FISH Control    | 0.0278                       |
| Biotin Control vs. No FISH Control       | 0.9027                       |
| M2-1 HA mRNA 6 hpi                       |                              |
| RSVg-L vs. No Primary Control            | <0.0001                      |
| RSVg-L vs. No V5 Control                 | 0.0091                       |
| RSVg-L vs. Scrambled Control             | 0.007                        |
| RSVg-L vs. Biotin Control                | 0.0358                       |
| RSVg-L vs. No FISH Control               | 0.0251                       |
| No Primary Control vs. No V5 Control     | 0.8535                       |
| No Primary Control vs. Scrambled Control | 0.8856                       |
| No Primary Control vs. Biotin Control    | 0.6028                       |
| No Primary Control vs. No FISH Control   | 0.68                         |
| No V5 Control vs. Scrambled Control      | >0.9999                      |
| No V5 Control vs. Biotin Control         | 0.9981                       |
| No V5 Control vs. No FISH Control        | 0.9996                       |
| Scrambled Control vs. Biotin Control     | 0.996                        |
| Scrambled Control vs. No FISH Control    | 0.9989                       |
| Biotin Control vs. No FISH Control       | >0.9999                      |
| M2-1 HA mRNA 8 hpi                       |                              |
| RSVg-L vs. No Primary Control            | <0.0001                      |
| RSVg-L vs. No V5 Control                 | 0.0007                       |
| RSVg-L vs. Scrambled Control             | 0.008                        |
| RSVg-L vs. Biotin Control                | 0.0139                       |
| RSVg-L vs. No FISH Control               | <0.0001                      |
| No Primary Control vs. No V5 Control     | 0.9487                       |
| No Primary Control vs. Scrambled Control | 0.6522                       |
| No Primary Control vs. Biotin Control    | 0.5435                       |
| No Primary Control vs. No FISH Control   | >0.9999                      |
| No V5 Control vs. Scrambled Control      | 0.9889                       |
| No V5 Control vs. Biotin Control         | 0.9688                       |
| No V5 Control vs. No FISH Control        | 0.9555                       |
| Scrambled Control vs. Biotin Control     | >0.9999                      |
| Scrambled Control vs. No FISH Control    | 0.6712                       |
| Biotin Control vs. No FISH Control       | 0.5632                       |
|                                          |                              |
| <b>Graph Title</b>                       | NS1 mRNA-L PLA (# of Puncta) |
| <b>Comparison</b>                        | <b>P Value</b>               |
| M2-2-Myc mRNA 6 hpi                      |                              |
| NS1-L vs. No Primary Control             | <0.0001                      |

|                                              |         |
|----------------------------------------------|---------|
| NS1-L vs. No V5 Control                      | 0.0276  |
| NS1-L vs. Scrambled Control                  | 0.6412  |
| NS1-L vs. Biotin Control                     | 0.0104  |
| NS1-L vs. No FISH Control                    | 0.8615  |
| NS1-L vs. Mock Infected Control              | 0.9981  |
| No Primary Control vs. No V5 Control         | 0.5838  |
| No Primary Control vs. Scrambled Control     | 0.0211  |
| No Primary Control vs. Biotin Control        | 0.7744  |
| No Primary Control vs. No FISH Control       | 0.0057  |
| No Primary Control vs. Mock Infected Control | <0.0001 |
| No V5 Control vs. Scrambled Control          | 0.7496  |
| No V5 Control vs. Biotin Control             | >0.9999 |
| No V5 Control vs. No FISH Control            | 0.497   |
| No V5 Control vs. Mock Infected Control      | 0.0048  |
| Scrambled Control vs. Biotin Control         | 0.5548  |
| Scrambled Control vs. No FISH Control        | 0.9998  |
| Scrambled Control vs. Mock Infected Control  | 0.3     |
| Biotin Control vs. No FISH Control           | 0.3107  |
| Biotin Control vs. Mock Infected Control     | 0.0015  |
| No FISH Control vs. Mock Infected Control    | 0.5394  |
| M2-2-Myc mRNA 8 hpi                          |         |
| NS1-L vs. No Primary Control                 | <0.0001 |
| NS1-L vs. No V5 Control                      | <0.0001 |
| NS1-L vs. Scrambled Control                  | <0.0001 |
| NS1-L vs. Biotin Control                     | 0.023   |
| NS1-L vs. No FISH Control                    | 0.3107  |
| NS1-L vs. Mock Infected Control              | 0.0143  |
| No Primary Control vs. No V5 Control         | 0.1873  |
| No Primary Control vs. Scrambled Control     | 0.0358  |
| No Primary Control vs. Biotin Control        | <0.0001 |
| No Primary Control vs. No FISH Control       | <0.0001 |
| No Primary Control vs. Mock Infected Control | <0.0001 |
| No V5 Control vs. Scrambled Control          | 0.9955  |
| No V5 Control vs. Biotin Control             | <0.0001 |
| No V5 Control vs. No FISH Control            | <0.0001 |
| No V5 Control vs. Mock Infected Control      | <0.0001 |
| Scrambled Control vs. Biotin Control         | 0.0013  |
| Scrambled Control vs. No FISH Control        | <0.0001 |
| Scrambled Control vs. Mock Infected Control  | <0.0001 |
| Biotin Control vs. No FISH Control           | <0.0001 |
| Biotin Control vs. Mock Infected Control     | <0.0001 |
| No FISH Control vs. Mock Infected Control    | 0.8849  |
| M2-1-HA mRNA 6 hpi                           |         |
| NS1-L vs. No Primary Control                 | <0.0001 |
| NS1-L vs. No V5 Control                      | <0.0001 |
| NS1-L vs. Scrambled Control                  | <0.0001 |
| NS1-L vs. Biotin Control                     | <0.0001 |
| NS1-L vs. No FISH Control                    | <0.0001 |
| NS1-L vs. Mock Infected Control              | <0.0001 |
| No Primary Control vs. No V5 Control         | 0.9998  |
| No Primary Control vs. Scrambled Control     | 0.8207  |
| No Primary Control vs. Biotin Control        | 0.413   |
| No Primary Control vs. No FISH Control       | 0.0018  |
| No Primary Control vs. Mock Infected Control | 0.0104  |



|                                              |                                 |
|----------------------------------------------|---------------------------------|
| No V5 Control vs. Scrambled Control          | 0.9581                          |
| No V5 Control vs. Biotin Control             | 0.6694                          |
| No V5 Control vs. No FISH Control            | 0.0077                          |
| No V5 Control vs. Mock Infected Control      | 0.0358                          |
| Scrambled Control vs. Biotin Control         | 0.9955                          |
| Scrambled Control vs. No FISH Control        | 0.1405                          |
| Scrambled Control vs. Mock Infected Control  | 0.3601                          |
| Biotin Control vs. No FISH Control           | 0.4685                          |
| Biotin Control vs. Mock Infected Control     | 0.7744                          |
| No FISH Control vs. Mock Infected Control    | 0.9992                          |
| M2-1-HA mRNA 8 hpi                           |                                 |
| NS1-L vs. No Primary Control                 | <0.0001                         |
| NS1-L vs. No V5 Control                      | <0.0001                         |
| NS1-L vs. Scrambled Control                  | <0.0001                         |
| NS1-L vs. Biotin Control                     | <0.0001                         |
| NS1-L vs. No FISH Control                    | 0.9987                          |
| NS1-L vs. Mock Infected Control              | 0.9998                          |
| No Primary Control vs. No V5 Control         | 0.5838                          |
| No Primary Control vs. Scrambled Control     | 0.2441                          |
| No Primary Control vs. Biotin Control        | 0.497                           |
| No Primary Control vs. No FISH Control       | <0.0001                         |
| No Primary Control vs. Mock Infected Control | <0.0001                         |
| No V5 Control vs. Scrambled Control          | 0.998                           |
| No V5 Control vs. Biotin Control             | >0.9999                         |
| No V5 Control vs. No FISH Control            | <0.0001                         |
| No V5 Control vs. Mock Infected Control      | <0.0001                         |
| Scrambled Control vs. Biotin Control         | 0.9995                          |
| Scrambled Control vs. No FISH Control        | <0.0001                         |
| Scrambled Control vs. Mock Infected Control  | <0.0001                         |
| Biotin Control vs. No FISH Control           | <0.0001                         |
| Biotin Control vs. Mock Infected Control     | <0.0001                         |
| No FISH Control vs. Mock Infected Control    | 0.9733                          |
|                                              |                                 |
| <b>Graph Title</b>                           | NS1 mRNA-L PLA (Normalized PLA) |
| <b>Comparison</b>                            | <b>P Value</b>                  |
| M2-2-Myc mRNA 6 hpi                          |                                 |
| NS1-L vs. No Primary Control                 | 0.758                           |
| NS1-L vs. No V5 Control                      | 0.9895                          |
| NS1-L vs. Scrambled Control                  | 0.9998                          |
| NS1-L vs. Biotin Control                     | 0.9996                          |
| NS1-L vs. No FISH Control                    | 0.6786                          |
| No Primary Control vs. No V5 Control         | 0.9786                          |
| No Primary Control vs. Scrambled Control     | 0.5883                          |
| No Primary Control vs. Biotin Control        | 0.9039                          |
| No Primary Control vs. No FISH Control       | 0.0546                          |
| No V5 Control vs. Scrambled Control          | 0.9491                          |
| No V5 Control vs. Biotin Control             | 0.9996                          |
| No V5 Control vs. No FISH Control            | 0.289                           |
| Scrambled Control vs. Biotin Control         | 0.9926                          |
| Scrambled Control vs. No FISH Control        | 0.8321                          |
| Biotin Control vs. No FISH Control           | 0.4764                          |
| M2-2-Myc mRNA 8 hpi                          |                                 |
| NS1-L vs. No Primary Control                 | <0.0001                         |
| NS1-L vs. No V5 Control                      | <0.0001                         |

|                                          |         |
|------------------------------------------|---------|
| NS1-L vs. Scrambled Control              | <0.0001 |
| NS1-L vs. Biotin Control                 | <0.0001 |
| NS1-L vs. No FISH Control                | <0.0001 |
| No Primary Control vs. No V5 Control     | 0.1676  |
| No Primary Control vs. Scrambled Control | 0.7066  |
| No Primary Control vs. Biotin Control    | 0.0057  |
| No Primary Control vs. No FISH Control   | <0.0001 |
| No V5 Control vs. Scrambled Control      | 0.9364  |
| No V5 Control vs. Biotin Control         | 0.8531  |
| No V5 Control vs. No FISH Control        | <0.0001 |
| Scrambled Control vs. Biotin Control     | 0.2864  |
| Scrambled Control vs. No FISH Control    | <0.0001 |
| Biotin Control vs. No FISH Control       | <0.0001 |
| M2-1-HA mRNA 6 hpi                       |         |
| NS1-L vs. No Primary Control             | <0.0001 |
| NS1-L vs. No V5 Control                  | <0.0001 |
| NS1-L vs. Scrambled Control              | 0.0004  |
| NS1-L vs. Biotin Control                 | 0.0001  |
| NS1-L vs. No FISH Control                | 0.0006  |
| No Primary Control vs. No V5 Control     | >0.9999 |
| No Primary Control vs. Scrambled Control | 0.989   |
| No Primary Control vs. Biotin Control    | 0.9994  |
| No Primary Control vs. No FISH Control   | 0.9772  |
| No V5 Control vs. Scrambled Control      | 0.9982  |
| No V5 Control vs. Biotin Control         | >0.9999 |
| No V5 Control vs. No FISH Control        | 0.9945  |
| Scrambled Control vs. Biotin Control     | 0.9998  |
| Scrambled Control vs. No FISH Control    | >0.9999 |
| Biotin Control vs. No FISH Control       | 0.9988  |
| M2-1-HA mRNA 8 hpi                       |         |
| NS1-L vs. No Primary Control             | 0.0561  |
| NS1-L vs. No V5 Control                  | 0.4353  |
| NS1-L vs. Scrambled Control              | 0.456   |
| NS1-L vs. Biotin Control                 | 0.9455  |
| NS1-L vs. No FISH Control                | 0.3035  |
| No Primary Control vs. No V5 Control     | 0.9279  |
| No Primary Control vs. Scrambled Control | 0.9178  |
| No Primary Control vs. Biotin Control    | 0.3953  |
| No Primary Control vs. No FISH Control   | <0.0001 |
| No V5 Control vs. Scrambled Control      | >0.9999 |
| No V5 Control vs. Biotin Control         | 0.9347  |
| No V5 Control vs. No FISH Control        | 0.0014  |
| Scrambled Control vs. Biotin Control     | 0.9434  |
| Scrambled Control vs. No FISH Control    | 0.0015  |
| Biotin Control vs. No FISH Control       | 0.0357  |
